# Supplementary material for: A general intramolecular Friedel–Crafts approach to functionalized pyrrolo[3,2,1-ij]quinolin-4-ones
Source: Royal Society of Chemistry journal article supplement (doi:10.1039/c2cc34650h), 2012-01-01

**Supporting Information**  
**For**  
**A General Intramolecular Friedel-Crafts Approach to Functionalized**  
**Pyrrolo[3,2,1-*ij*]quinolin-4-ones**

Dadasaheb V. Patil, Marchello A. Cavitt, Paul Grzybowski and Stefan France\*  
School of Chemistry and Biochemistry, Georgia Institute of Technology, 901 Atlantic Drive,  
Atlanta, Georgia 30332

stefan.france@chemistry.gatech.edu

**Table of Contents**

|                                                           |    |
|-----------------------------------------------------------|----|
| 1. General Methods.....                                   | 1  |
| 2. Experimental Procedures                                |    |
| a. Synthesis of $\beta$ -amide esters.....                | 2  |
| b. Preparation of Acrylates.....                          | 5  |
| c. In(OTf) <sub>3</sub> -Catalyzed Cyclizations.....      | 13 |
| 3. Control Reactions.....                                 | 21 |
| 4. References.....                                        | 21 |
| 5. NMR Spectra ( <sup>1</sup> H and <sup>13</sup> C)..... | 21 |

**1. General Methods**

All reactions were carried out in pre-dried glassware from the oven and any additional moisture was removed by flame-drying the reaction vessel. Each reaction proceeded under a nitrogen atmosphere with anhydrous solvents, unless stated otherwise. Tetrahydrofuran and diethyl ether were distilled from a sodium/benzophenone ketyl under nitrogen and stored in a Schlenk flask. Benzene, toluene, 1,2-dichloroethane and dichloromethane were purified by distillation from calcium hydride. All other reagents were purchased from Acros, Sigma-Aldrich, Fluka, VWR, Merck, Alfa Aesar, TCI and Strem (for metal catalysts) and used without further purification. Compounds **9** were synthesized according to our reported protocol.<sup>1</sup>

Chromatographic purification was performed as flash chromatography with Silicycle silica gel (40-65 $\mu$ m). For quantitative flash chromatography, technical grades solvents were utilized. Analytical thin-layer chromatography (TLC) was performed on Dynamic Absorbents, Inc. silica gel F<sub>254</sub> TLC glass plates. Visualization was accomplished with UV light, aqueous basic potassium permanganate (KMnO<sub>4</sub>) solution, iodine, aqueous acidic dinitrophenylhydrazine (DNP) solution, aqueous acidic *p*-anisaldehyde (PAA) solution, and an ethanol solution of phosphomolybdic acid (PMA) followed by heating. Each yield refers to an isolated, analytically-pure material.

Infrared (IR) spectra were obtained using a Nicolet 4700 FTIR with an ATR attachment from SmartOrbit Thermoelectronic Corp. The IR bands are characterized as weak (w), medium (m), and strong (s). Proton and carbon nuclear magnetic resonance spectra (<sup>1</sup>H NMR and <sup>13</sup>C NMR) were recorded on a Varian Mercury Vx 300 MHz spectrometer, Varian Mercury Vx 400 MHz spectrometer or Bruker 400 MHz spectrometer with solvent resonances as the internal standard (<sup>1</sup>H NMR: CDCl<sub>3</sub> at 7.26 ppm; <sup>13</sup>C NMR: CDCl<sub>3</sub> at 77.0 ppm). <sup>1</sup>H NMR data are reported as follows: chemical shift (ppm), multiplicity (s = singlet, d = doublet, dd = doublet of doublets, dt = doublet of triplets, ddd = doublet of doublet of doublets, t = triplet, m = multiplet, br = broad), coupling constants (Hz), and integration. Mass spectra

were obtained using a MicroMass Autospec M. The accurate mass analyses were run in EI mode at a mass resolution of 10,000 using PFK (perfluorokerosene) as an internal calibrant.

Diastereomeric ratios for cyclized products **11** were determined by  $^1\text{H}$  NMR based on comparing the signal ratios of the benzylic protons ( $\sim 4.0$ - $5.0$  ppm) for the two diastereomeric protons. These assignments are based on the coupling constants. A single observable diastereomer corresponds to  $>99:1$  *dr*.

## 2. Experimental Procedures

### A. Synthesis of $\beta$ -amide esters

Sodium hydride (1.2 equiv.) was suspended in THF and cooled to 0 °C. In a separate flask, the desired *N*-heterocycle (1.0 equiv.) was dissolved in THF and syringed into the reaction vessel. After 30 min, methyl-3-chloro-3-oxopropanoate (1.25 equiv.) was added quickly. The reaction was stirred for 14 h at room temperature. The reaction mixture was quenched with water. The organic layer was separated, and the aqueous layer was extracted three times with EtOAc. The combined organic layers were washed with brine, dried with anhydrous  $\text{Na}_2\text{SO}_4$ , filtered, and concentrated under reduced pressure. The residue was purified by silica gel flash chromatography for product isolation.

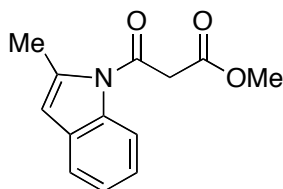

**9a**

**Methyl 3-(2-methyl-1H-indol-1-yl)-3-oxopropanoate (9a):** The general procedure was followed using sodium hydride (1.91 g, 47.7 mmol), 2-methyl-1H-indole (5.00 g, 38.2 mmol), methyl-3-chloro-3-oxopropanoate (4.91 mL, 45.7 mmol), and THF (125 mL). After 14 h, the reaction was quenched, and column chromatography afforded **9a** as a brick red solid (6.05 g, 69%). ( $R_f$  0.40, 30% EtOAc/Hex) [m.p. 74-76°C]  $^1\text{H}$  NMR (400 MHz,  $\text{CDCl}_3$ )  $\delta$  ppm 7.87 - 7.92 (m, 1H), 7.43 - 7.48 (m, 1H), 7.21 - 7.28 (m, 2H), 6.39 (s, 1H), 4.07 (s, 2H), 3.81 (s, 3H), 2.61 (d,  $J$  = 1.12 Hz, 3H).  $^{13}\text{C}$  NMR (101 MHz,  $\text{CDCl}_3$ )  $\delta$  ppm 166.9, 165.9, 137.0, 136.3, 129.8, 123.9, 123.6, 120.0, 114.9, 110.6, 52.7, 45.6, 17.3. IR: 3022.4 (w), 2953.1 (w), 1733.8 (s), 1700.1 (s), 1684.4 (s), 1606.3 (m), 1588.1 (m), 1526.9 (m), 1450.5 (m), 1374.4 (m), 1300.3 (m), 1235.7 (s), 1162.5 (m), 1085.2 (w), 758.3 (s), 668.5 (w), 649.4 (w)  $\text{cm}^{-1}$ . HRMS (ESI)  $M/Z$ + Calc. 231.0895, Obs. 231.0894.

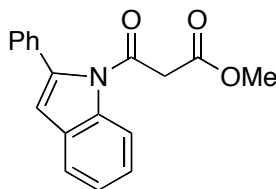

**9b**

**Methyl 3-oxo-3-(2-phenyl-1H-indol-1-yl)propanoate (9b):** The general procedure was followed using sodium hydride (0.414 g, 17.3 mmol), 2-phenyl-1H-indole (3.00 g, 15.5 mmol), methyl-3-chloro-3-oxopropanoate (2.0 mL, 18.7 mmol), and THF (140 mL). After 5 h, the reaction was quenched, and column chromatography afforded **9b** as an orange oil (1.28 g, 28%). ( $R_f$  0.48, 30% EtOAc/Hex)  $^1\text{H}$  NMR (400 MHz,  $\text{CDCl}_3$ )  $\delta$  ppm 8.40 (qd,  $J$  = 0.84, 8.28 Hz, 1H), 7.55 - 7.59 (m, 1H), 7.44 - 7.49 (m, 5H), 7.36 -

7.41 (m, 1H), 7.29 - 7.34 (m, 1H), 6.64 (d,  $J = 0.69$  Hz, 1H), 3.63 (s, 3H), 3.39 (s, 2H).  $^{13}\text{C}$  NMR (101 MHz,  $\text{CDCl}_3$ )  $\delta$  ppm 166.8, 166.7, 139.0, 137.9, 133.3, 129.1, 129.0, 129.0, 125.5, 124.2, 120.5, 120.4, 116.3, 112.5, 52.4, 45.9. IR: 3029.5 (w), 2958.2 (s), 2925.4 (s), 2852.3 (s), 1745.4 (s), 1715.4 (s), 1604.8 (w), 1470.7 (m), 1451.8 (w), 1406.9 (m), 1359.4 (m), 1341.8 (w), 1301.7 (m), 1253.6 (w), 1205.1 (m), 1155.5 (m), 1117.3 (w), 1076.5 (m), 1056.7 (w), 1020.7 (w), 970.1 (m), 919.4 (w), 821.1 (w), 747.8 (m), 700.7 (w)  $\text{cm}^{-1}$ . HRMS (ESI)  $M/Z^+$  Calc. 293.1052, Obs. 293.1053.

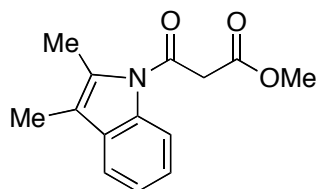

**9c**

**Methyl 3-(2,3-dimethyl-1H-indol-1-yl)-3-oxopropanoate (9c):** The general procedure was followed using sodium hydride (0.330 g, 8.26 mmol), 2,3-dimethyl-1H-indole (1.00 g, 6.89 mmol), methyl-3-chloro-3-oxopropanoate (0.921 mL, 8.61 mmol), and THF (35 mL). After 14 h, the reaction was quenched, and column chromatography afforded **9c** as a pale yellow solid (1.05 g, 62%). ( $R_f$  0.26, 20% EtOAc/Hex) [m.p. 75-77°C]  $^1\text{H}$  NMR (300 MHz,  $\text{CDCl}_3$ )  $\delta$  ppm 7.77-7.84 (m, 1H), 7.26-7.32 (m, 1H), 7.17 (m, 2H), 3.88 (s, 2H), 3.72 (s, 3H), 2.34 (s, 3H), 2.03 (s, 3H).  $^{13}\text{C}$  NMR (75 MHz,  $\text{CDCl}_3$ )  $\delta$  ppm 8.2, 13.5, 45.2, 52.1, 114.5, 115.8, 117.7, 122.9, 123.6, 130.8, 131.6, 135.0, 165.3, 166.7. IR: 2989.2 (w), 2959.3 (w), 2925.6 (w), 1741.6 (s), 1681.3 (s), 1615.5 (w), 1449.6 (m), 1433.5 (m), 1361.6 (s), 1329.6 (m), 1259.5 (s), 1229.0 (w), 1162.2 (s), 1127.1 (m), 1100.2 (w), 1069.9 (w), 1019.5 (s), 928.9 (m), 833.2 (w), 759.5 (s), 691.3 (m), 613.1 (m)  $\text{cm}^{-1}$ . HRMS (ESI)  $M/Z^+$  Calc. 245.1052, Obs. 245.1053.

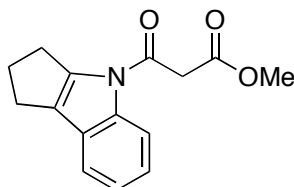

**9d**

**Methyl 3-(2,3-dihydrocyclopenta[b]indol-4(1H)-yl)-3-oxopropanoate (9d):** The general procedure was followed using sodium hydride (0.764 g, 19.1 mmol), 1,2,3,4-tetrahydrocyclopenta[b]indole (2.5 g, 15.9 mmol), methyl-3-chloro-3-oxopropanoate (2.1 mL, 19.1 mmol), and THF (45 mL). After 16 h, the reaction was quenched, and column chromatography afforded **9d** as a brick red solid (3.47 g, 85%). ( $R_f$  0.30, 25% EtOAc/Hex) [m.p. 120-122°C]  $^1\text{H}$  NMR (300 MHz,  $\text{CDCl}_3$ )  $\delta$  ppm 8.41 (d,  $J = 5.46$  Hz, 1H), 7.31 - 7.37 (m, 1H), 7.21 - 7.30 (m, 2H), 3.86 (s, 2H), 3.79 (s, 3H), 2.92 - 3.00 (m, 2H), 2.70 - 2.78 (m, 2H), 2.45 - 2.57 (m, 2H).  $^{13}\text{C}$  NMR (75 MHz,  $\text{CDCl}_3$ )  $\delta$  ppm 167.0, 164.3, 140.9, 128.3, 126.9, 124.7, 124.2, 123.9, 118.5, 117.3, 52.7, 43.8, 29.5, 27.6, 23.6. IR: 3116.2 (w), 2988.6 (w), 2947.9 (w), 2928.3 (w), 2869.6 (w), 1752.8 (s), 1693.5 (s), 1608.7 (m), 1447.9 (m), 1434.9 (s), 1379.7 (m), 1346.6 (w), 1325.2 (w), 1260.4 (s), 1161.9 (m), 1122.1 (m), 1074.0 (m), 1029.6 (m), 768.6 (s), 749.6 (m), 686.1 (m)  $\text{cm}^{-1}$ . HRMS (ESI)  $M/Z^+$  Calc. 257.1052, Obs. 257.1045.

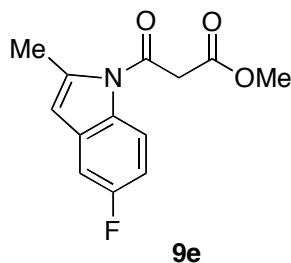

**Methyl 3-(5-fluoro-2-methyl-1H-indol-1-yl)-3-oxopropanoate (9e):** The general procedure was followed using potassium hydride (0.711 g, 17.7 mmol), 5-fluoro-2-methyl-1H-indole (2.03 g, 13.6 mmol), methyl-3-chloro-3-oxopropanoate (1.9 mL, 17.7 mmol), and THF (18 mL). After 14 h, the reaction was quenched, and column chromatography afforded **9e** as a red solid (0.805 g, 24%). ( $R_f$  0.20, 20% EtOAc/Hex) [m.p. 80-82°C]  $^1\text{H NMR}$  (300 MHz,  $\text{CDCl}_3$ )  $\delta$  ppm 7.96 (dd,  $J = 4.45, 9.11$  Hz, 1H), 7.08 (dd,  $J = 2.60, 8.54$  Hz, 1H), 6.95 (dt,  $J = 2.64, 9.09$  Hz, 1H), 6.35 (s, 1H), 4.03 (s, 2H), 3.80 (s, 3H), 2.59 (s, 3H).  $^{13}\text{C NMR}$  (75 MHz,  $\text{CDCl}_3$ )  $\delta$  ppm 166.8, 165.6, 161.2, 158.0, 138.1, 133.0, 130.9, 130.8, 116.5 and 116.4 (doublet), 111.6, 111.3, 110.6 and 110.5 (doublet), 105.8, 105.4, 52.8, 45.4, 17.3. IR: 3013.0 (w), 2956.9 (w), 1752.2 (s), 1682.4 (s), 1603.6 (m), 1476.2 (m), 1438.8 (m), 1376.3 (m), 1301.9 (w), 1259.5 (w), 1187.8 (m), 1157.8 (s), 1129.8 (m), 1000.5 (m), 958.5 (m), 870.7 (m), 797.1 (m), 780.4 (m), 668.4 (m)  $\text{cm}^{-1}$ . HRMS (ESI) M/Z+ Calc. 249.0801, Obs. 249.0809.

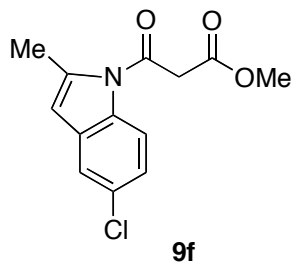

**Methyl 3-(5-chloro-2-methyl-1H-indol-1-yl)-3-oxopropanoate (9f):** The general procedure was followed using sodium hydride (0.2908 g, 7.27 mmol), 5-chloro-2-methyl-1H-indole (1.00 g, 6.06 mmol), methyl-3-chloro-3-oxopropanoate (0.811 mL, 7.57 mmol), and THF (30 mL). After 16 h, the reaction was quenched, and column chromatography afforded **9f** as a reddish brown solid (0.114 g, 11%). ( $R_f$  0.25, 20% EtOAc/Hex) [m.p. 46-48°C]  $^1\text{H NMR}$  (300 MHz,  $\text{CDCl}_3$ )  $\delta$  ppm 7.88 (dd,  $J = 0.44, 8.90$  Hz, 1H), 7.35 (d,  $J = 2.05$  Hz, 1H), 7.16 (dd,  $J = 2.09, 8.90$  Hz, 1H), 6.27 (d,  $J = 0.62$  Hz, 1H), 3.99 (s, 2H), 3.79 (s, 3H), 2.55 (s, 3H).  $^{13}\text{C NMR}$  (75 MHz,  $\text{CDCl}_3$ )  $\delta$  ppm 166.6, 165.6, 137.8, 134.9, 130.9, 129.1, 123.9, 119.4, 116.3, 109.9, 52.7, 45.3, 17.2. IR: 2993.0 (w), 2953.8 (w), 1746.0 (s), 1697.9 (s), 1594.7 (m), 1446.3 (s), 1362.6 (s), 1334.8 (m), 1309.2 (m), 1254.0 (s), 1159.8 (s), 1075.0 (w), 1041.4 (w), 1000.9 (w), 919.6 (w), 807.6 (w), 723.6 (w)  $\text{cm}^{-1}$ . HRMS (ESI) M/Z+ Calc. 265.0501, Obs. 265.0499.

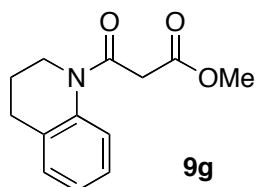

**Methyl 3-(3,4-dihydroquinolin-1(2H)-yl)-3-oxopropanoate (9g):** A mixture of potassium carbonate (6.23 g, 44.0 mmol) and 1,2,3,4-tetrahydroquinoline (3.0 g, 22.5 mmol), methyl-3-chloro-3-oxopropanoate (2.7 mL, 24.8 mmol) and acetonitrile (60 mL) were heated to reflux. After 14 h, the reaction mixture was cooled, filtered and dried *in vacuo*. The residue was dissolved in EtOAc/Hex (1:2.5). The organic layer

was separated, and the aqueous layer was extracted three times with EtOAc. The combined organic layers were dried with anhydrous sodium sulfate, filtered, and concentrated. Column chromatography afforded **9g** as a reddish orange oil (3.76 g, 72%). ( $R_f$  0.30, 25% EtOAc/Hex)  $^1\text{H NMR}$  (300 MHz,  $\text{CDCl}_3$ )  $\delta$  ppm 7.07 - 7.19 (m, 4H), 3.74 - 3.83 (m, 2H), 3.65 (s, 3H), 3.58 (s, 2H), 2.69 (t,  $J=6.49$  Hz, 2H), 1.94 (quin,  $J=6.65$  Hz, 2H).  $^{13}\text{C NMR}$  (75 MHz,  $\text{CDCl}_3$ )  $\delta$  ppm 168.1, 165.5, 128.4, 126.3, 125.8, 123.9, 52.2, 42.7, 41.4, 26.4, 23.7. IR: 3004.1 (w), 2951.0 (w), 2889.1 (w), 1739.3 (s), 1651.4 (s), 1603.6 (w), 1580.9 (w), 1491.8 (s), 1435.5 (w), 1386.9 (m), 1326.1 (w), 1201.5 (m), 1155.7 (m), 1074.0 (w), 1019.9 (m), 949.0 (w), 763.0 (s)  $\text{cm}^{-1}$ . HRMS (ESI)  $M/Z+$  Calc. 233.1052, Obs. 233.1031.

## B. Preparation of Acrylates

**General Method A:**<sup>2</sup> The  $\beta$ -amide ester (1.0 equiv.), aldehyde (1.3 equiv.), glacial acetic acid (0.5 equiv.), and piperidine (0.1 equiv.) were heated to a reflux in benzene using a Dean-Stark trap for 14 h. After cooling the reaction mixture to room temperature, water was added to the reaction vessel, and the organic layer was collected. Subsequently, the aqueous phase was extracted with EtOAc three times. The combined organic layers were washed with 1M HCl and saturated sodium bicarbonate. The combined organic layers were dried with  $\text{Na}_2\text{SO}_4$ , filtered, concentrated, and purified by silica gel column chromatography (gradient EtOAc/Hex).

**General Method B:**<sup>3</sup> A round bottom flask was charged with the  $\beta$ -amide ester (1.0 equiv.) and THF (25 mL). After cooling the solution to 0 °C, titanium(IV) chloride tetrahydrofuran complex (2.0 equiv.) and  $\text{CCl}_4$  (2.0 equiv.) were added to the reaction vessel. After 1 h at 0 °C, the aldehyde (1.0 equiv.) was added slowly, and the reaction was stirred for an hour. Then, pyridine (4.0 equiv.) was added to the solution dropwise. The reaction mixture was warmed to room temperature and allowed to stir for 14 h. The reaction was quenched with water and the organic layer was collected. The aqueous layer was extracted with ether, and the combined organic layers were washed with saturated  $\text{NaHCO}_3$  and brine. The organic layer was dried with  $\text{Mg}_2\text{SO}_4$ , filtered, concentrated, and purified by silica gel column chromatography (gradient EtOAc/Hex).

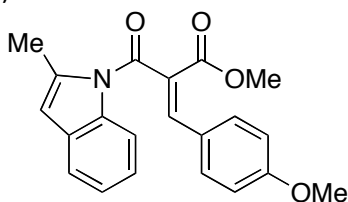

(Z)-10a

**(Z)-Methyl 3-(4-methoxyphenyl)-2-(2-methyl-1H-indol-1-yl)-3-oxopropanoate (10a):** Methyl 3-(2-methyl-1H-indol-1-yl)-3-oxopropanoate (1.80 g, 7.78 mmol), 4-methoxybenzaldehyde (1.2 mL, 10.1 mmol), glacial acetic acid (0.262 g, 4.37 mmol), piperidine (80  $\mu\text{L}$ , 0.810 mmol) and benzene (120 mL) were mixed according to general method A to afford **10a** as an orange oil (2.50 g, 92%) after 18 h. ( $R_f$  0.24, 20% EtOAc/Hex) (*Diastereomer!*)  $^1\text{H NMR}$  (300 MHz,  $\text{CDCl}_3$ )  $\delta$  ppm 8.43 (br. s., 0.81), 7.87 (s, 1.13), 7.72 (s, 0.15), 7.33 - 7.47 (m, 3.50), 7.21 - 7.30 (m, 2.08), 6.89 (d,  $J = 8.79$  Hz, 0.27), 6.75 (d,  $J = 8.76$  Hz, 2.10), 6.35 (s, 1.00), 3.87 (d,  $J = 0.70$  Hz, 0.25), 3.83 (s, 0.26), 3.81 (s, 0.31), 3.77 (s, 2.63), 3.72 (s, 2.94), 2.48 (br. s., 2.87).  $^{13}\text{C NMR}$  (75 MHz,  $\text{CDCl}_3$ )  $\delta$  ppm 166.3, 165.1, 161.8, 142.9, 142.5, 131.9, 131.4, 129.8, 125.6, 124.7, 119.6, 114.5, 114.3, 55.2, 52.7, 16.7. IR: 3065.3 (w), 2951.7 (w), 2939.1 (w), 1720.6 (s), 1682.4 (s), 1600.9 (s), 1511.8 (s), 1452.5 (s), 1385.8 (m), 1321.3 (m), 1290.4 (m), 1258.9 (s), 1203.7 (m),

1172.3 (s), 1123.0 (m), 1056.1 (w), 1027.6 (m), 917.2 (w), 831.4 (m), 763.9 (s), 751.0 (s), 700.6 (m)  $\text{cm}^{-1}$ .  
**HRMS (ESI) M/Z+** Calc. 349.1314, Obs. 349.1319.

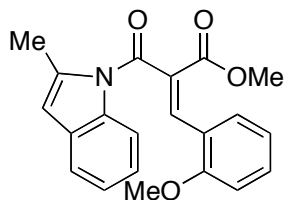

**(Z)-10b**

**(Z)-Methyl 3-(2-methoxyphenyl)-2-(2-methyl-1H-indole-1-carbonyl)acrylate (10b):** Methyl 3-(2-methyl-1H-indol-1-yl)-3-oxopropanoate (0.200 g, 0.865 mmol), 2-methoxybenzaldehyde (0.153 g, 1.12 mmol), glacial acetic acid (0.026 g, 0.433 mmol), piperidine (0.0147 g, 0.173 mmol) and benzene (20 mL) were mixed according to general method A to afford **10b** as a yellow solid (0.231 g, 75%) after 16 h. ( $R_f$  0.69, 30% EtOAc/Hex) [**m.p.** 102-104 °C] (Temperature for the  $^1\text{H}$  NMR and  $^{13}\text{C}$  NMR = 70 °C)  $^1\text{H}$  NMR (400 MHz,  $\text{CDCl}_3$ )  $\delta$  ppm 8.30 (s, 1H), 8.22 (d,  $J$  = 7.28 Hz, 1H), 7.43 - 7.48 (m, 1H), 7.36 - 7.42 (m, 1H), 7.28 - 7.34 (m, 1H), 7.22 - 7.28 (m, 2H), 6.87 (d,  $J$  = 8.34 Hz, 1H), 6.82 (t,  $J$  = 7.84 Hz, 1H), 6.36 (s, 1H), 3.83 (s, 3H), 3.74 (s, 3H), 2.60 (d,  $J$  = 0.94 Hz, 3H).  $^{13}\text{C}$  NMR (101 MHz,  $\text{CDCl}_3$ )  $\delta$  ppm 165.9, 165.2, 158.3, 139.7, 137.1, 132.2, 130.2, 129.9, 129.2, 123.8, 123.5, 122.2, 120.9, 119.6, 115.6, 111.2, 110.0, 55.3, 52.4, 16.5. **IR:** 3051.9 (w), 3003.8 (w), 2951.9 (m), 2840.2 (m), 1713.4 (s), 1680.3 (s), 1618.7 (m), 1596.8 (s), 1574.7 (m), 1487.0 (m), 1455.4 (s), 1435.7 (s), 1383.5 (s), 1307.0 (s), 1261.0 (s), 1240.3 (s), 1194.9 (s), 1164.3 (m), 1116.8 (m), 1083.5 (m), 1050.6 (w), 1024.7 (m), 993.0 (w), 840.3 (w), 804.0 (w), 749.2 (s), 730.4 (s), 648.0 (w)  $\text{cm}^{-1}$ . **HRMS (ESI) M/Z+** Calc. 349.1314, Obs. 349.1315.

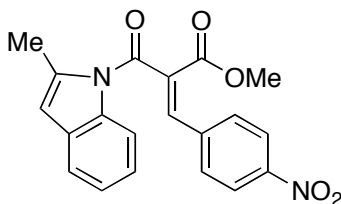

**(Z)-10c**

**(Z)-Methyl 2-(2-methyl-1H-indole-1-carbonyl)-3-(4-nitrophenyl)acrylate (10c):** Methyl 3-(2-methyl-1H-indol-1-yl)-3-oxopropanoate (0.300 g, 1.30 mmol), 4-nitrobenzaldehyde (0.255 mg, 1.69 mmol), glacial acetic acid (0.0357 g, 0.596 mmol), piperidine (14.0  $\mu\text{L}$ , 0.130 mmol) and benzene (25 mL) were mixed according to general method A to afford **10c** as an orange solid (0.300 g, 64%) after 18 h. ( $R_f$  0.45, 20% EtOAc/Hex) [**m.p.** 109-111 °C] (Temperature for the  $^1\text{H}$  NMR and  $^{13}\text{C}$  NMR = 70 °C)  $^1\text{H}$  NMR (400 MHz,  $\text{CDCl}_3$ )  $\delta$  ppm 8.03 - 8.09 (m, 3H), 7.94 (s, 1H), 7.49 - 7.54 (m, 2H), 7.38 - 7.42 (m, 1H), 7.20 - 7.25 (m, 2H), 6.34 (d,  $J$  = 0.94 Hz, 1H), 3.85 (s, 3H), 2.51 (s, 3H).  $^{13}\text{C}$  NMR (101 MHz,  $\text{CDCl}_3$ )  $\delta$  ppm 164.4, 164.0, 148.8, 139.9, 138.5, 136.7, 132.8, 130.0, 129.9, 124.3, 124.1, 123.9, 120.0, 115.0, 111.2, 52.9, 16.4. **IR:** 3108.3 (w), 2953.4 (w), 2929.6 (w), 1726.0 (s), 1678.5 (s), 1596.9 (m), 1521.3 (s), 1456.1 (s), 1436.1 (m), 1384.8 (s), 1291.1 (s), 1256.0 (s), 1200.9 (s), 1111.8 (w), 1083.9 (w), 1027.5 (w), 992.3 (w), 852.1 (w), 825.8 (w), 749.1 (s), 691.0 (w)  $\text{cm}^{-1}$ . **HRMS (ESI) M/Z+** Calc. 364.1059, Obs. 364.1076.

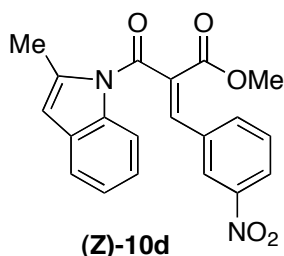

**(Z)-Methyl 2-(2-methyl-1H-indole-1-carbonyl)-3-(3-nitrophenyl)acrylate (10d):** Methyl 3-(2-methyl-1H-indol-1-yl)-3-oxopropanoate (0.350 g, 1.513 mmol), 3-nitrobenzaldehyde (0.297 mg, 1.97 mmol), glacial acetic acid (0.0417 g, 0.696 mmol), piperidine (15  $\mu$ L, 0.151 mmol) and benzene (20 mL) were mixed according to general method A to afford **10d** as a pale yellow solid (0.220 g, 40 %) after 20 h. ( $R_f$  0.40, 20% EtOAc/Hex) [m.p. 112-114 °C] (Temperature for the  $^1\text{H}$  NMR and  $^{13}\text{C}$  NMR = 60 °C)  $^1\text{H}$  NMR (400 MHz,  $\text{CDCl}_3$ )  $\delta$  ppm 8.21 - 8.24 (m, 1H), 8.10 (ddd,  $J$  = 1.00, 2.16, 8.25 Hz, 1H), 8.03 (br. s., 1H), 7.94 (s, 1H), 7.63 - 7.67 (m, 1H), 7.35 - 7.41 (m, 2H), 7.18 - 7.25 (m, 2H), 6.33 (d,  $J$  = 0.88 Hz, 1H), 3.86 (s, 3H), 2.54 (s, 3H).  $^{13}\text{C}$  NMR (101 MHz,  $\text{CDCl}_3$ )  $\delta$  ppm 164.6, 164.2, 148.7, 139.9, 136.7, 134.4, 134.2, 132.1, 130.1, 130.0, 124.9, 124.3, 124.2, 124.2, 120.0, 115.1, 111.3, 53.1, 16.7. IR: 3083.4 (w), 2954.9 (w), 2928.5 (w), 1727.7 (s), 1678.7 (s), 1630.1 (w), 1597.5 (w), 1576.9 (w), 1532.1 (s), 1456.4 (s), 1437.6 (m), 1386.4 (s), 1351.2 (s), 1308.8 (s), 1258.6 (s), 1203.4 (s), 1086.2 (w), 1027.7 (w), 992.8 (w), 824.9 (w), 808.9 (w), 751.6 (m), 736.8 (m), 676.3 (w)  $\text{cm}^{-1}$ . HRMS (ESI)  $M/Z^+$  Calc. 364.1059, Obs. 364.1065.

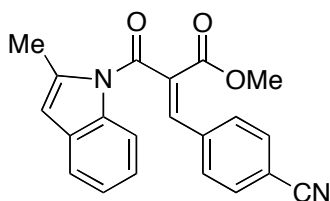

**(Z)-Methyl 3-(4-cyanophenyl)-2-(2-methyl-1H-indole-1-carbonyl)acrylate (10e):** Methyl 3-(2-methyl-1H-indol-1-yl)-3-oxopropanoate (0.350 g, 1.51 mmol), 4-cyanobenzaldehyde (0.258 mg, 1.97 mmol), glacial acetic acid (0.0417 g, 0.696 mmol), piperidine (15  $\mu$ L, 0.151 mmol) and benzene (20 mL) were mixed according to general method A to afford **10e** as an off-white solid (0.325 g, 62%) after 18 h. ( $R_f$  0.35, 20% EtOAc/Hex) [m.p. 122-124 °C]  $^1\text{H}$  NMR (300 MHz,  $\text{CDCl}_3$ )  $\delta$  ppm 8.81 - 8.05 (br. s., 1H), 7.38 - 7.53 (m, 6H), 7.20 - 7.28 (m, 2H), 6.35 (s, 1H), 3.82 (s, 3H), 2.46 (br. s., 3H).  $^{13}\text{C}$  NMR (75 MHz,  $\text{CDCl}_3$ )  $\delta$  ppm 164.6, 164.0, 140.4, 136.4, 132.5, 131.5, 129.6, 124.2, 119.9, 117.7, 113.8, 111.2, 53.1, 16.7. IR: 3056.6 (w), 2954.9 (w), 2928.2 (w), 2229.5 (m), 1725.7 (s), 1677.7 (s), 1627.5 (m), 1596.9 (m), 1576.6 (m), 1504.2 (w), 1456.0 (s), 1435.5 (m), 1384.3 (s), 1303.3 (s), 1256.1 (s), 1201.7 (s), 1152.5 (w), 1117.1 (w), 1084.3 (m), 1027.4 (m), 992.3 (m), 936.0 (w), 830.2 (m), 750.5 (s)  $\text{cm}^{-1}$ . HRMS (ESI)  $M/Z^+$  Calc. 344.1161, Obs. 344.1169.

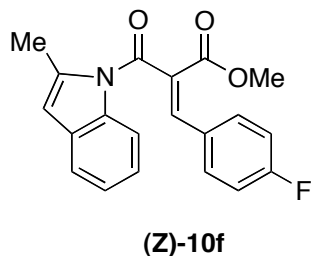

**(Z)-Methyl 3-(4-fluorophenyl)-2-(2-methyl-1H-indole-1-carbonyl)acrylate (10f):** Methyl 3-(2-methyl-1H-indol-1-yl)-3-oxopropanoate (0.350 g, 1.51 mmol), 4-fluorobenzaldehyde (0.210 mL, 2.00 mmol), glacial acetic acid (0.0417 g, 0.695 mmol), piperidine (15  $\mu$ L, 0.151 mmol) and benzene (25 mL) were mixed according to general method A to afford **10f** as a yellow solid (0.293 g, 57%) after 18 h. ( $R_f$  0.40, 20% EtOAc/Hex) [m.p. 76-78 °C] (Temperature for the  $^1\text{H NMR}$  and  $^{13}\text{C NMR}$  = 60 °C)  $^1\text{H NMR}$  (300 MHz,  $\text{CDCl}_3$ )  $\delta$  ppm 8.20 (br. s., 1H), 7.89 (s, 1H), 7.34 - 7.45 (m, 3H), 7.17 - 7.30 (m, 2H), 6.92 (t,  $J$  = 8.59 Hz, 2H), 6.34 (s, 1H), 3.80 (s, 3H), 2.50 (s, 3H).  $^{13}\text{C NMR}$  (75 MHz,  $\text{CDCl}_3$ )  $\delta$  ppm 165.7, 165.5, 164.7, 162.4, 141.8, 136.9, 131.9 and 131.7 (doublet), 129.9, 124.2 and 124.0 (doublet), 119.8, 116.4, 116.1, 115.5, 110.9, 52.7, 16.6. IR: 3076.2 (w), 2951.8 (w), 1724.8 (s), 1683.9 (s), 1627.8 (w), 1598.7 (s), 1508.9 (s), 1456.5 (s), 1436.7 (m), 1386.76 (s), 1301.0 (m), 1260.4 (s), 1197.7 (s), 1162.4 (s), 834.7 (m), 750.5 (s), 668.5 (m)  $\text{cm}^{-1}$ . HRMS (ESI) M/Z+ Calc. 337.1114, Obs. 349.1107.

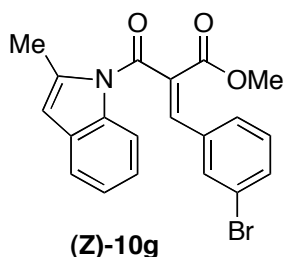

**(Z)-Methyl 3-(3-bromophenyl)-2-(2-methyl-1H-indole-1-carbonyl)acrylate (10g):** Methyl 3-(2-methyl-1H-indol-1-yl)-3-oxopropanoate (0.350 g, 1.51 mmol), 3-bromobenzaldehyde (0.230 mL, 1.97 mmol), glacial acetic acid (0.0417 g, 0.696 mmol), piperidine (15  $\mu$ L, 0.151 mmol) and benzene (20 mL) were mixed according to general method A to afford **10g** as a pale gray solid (0.430 g, 72 %) after 18 h. ( $R_f$  0.40, 20% EtOAc/Hex) [m.p. 107-109 °C] (Temperature for the  $^1\text{H NMR}$  and  $^{13}\text{C NMR}$  = 60 °C)  $^1\text{H NMR}$  (400 MHz,  $\text{CDCl}_3$ )  $\delta$  ppm 8.08 - 8.19 (m, 1H), 7.86 (s, 1H), 7.52 - 7.56 (m, 1H), 7.39 - 7.44 (m, 2H), 7.27 - 7.33 (m, 1H), 7.21 - 7.27 (m, 2H), 7.05 - 7.11 (m, 1H), 6.35 (d,  $J$  = 0.75 Hz, 1H), 3.85 (s, 3H), 2.54 (s, 3H).  $^{13}\text{C NMR}$  (101 MHz,  $\text{CDCl}_3$ )  $\delta$  ppm 165.0, 164.4, 141.2, 136.8, 136.5, 134.5, 133.5, 132.5, 130.5, 130.3, 130.0, 127.5, 124.2, 124.0, 123.0, 119.8, 115.3, 111.0, 52.8, 16.6. IR: 2962.5 (w), 2926.4 (w), 1726.6 (s), 1681.3 (s), 1625.7 (m), 1596.8 (w), 1561.3 (w), 1456.4 (s), 1435.7 (m), 1384.9 (s), 1311.0 (s), 1258.9 (s), 1198.1 (s), 1076.9 (w), 1027.7 (w), 994.3 (w), 786.6 (w), 750.3 (s), 680.8 (w)  $\text{cm}^{-1}$ . HRMS (ESI) M/Z+ Calc. 397.0314, Obs. 397.0316.

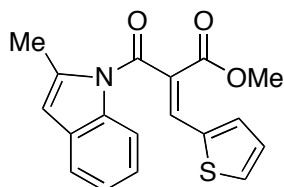

**(Z)-Methyl 2-(2-methyl-1H-indole-1-carbonyl)-3-(thiophen-2-yl)acrylate (10h):** Methyl 3-(2-methyl-1H-indol-1-yl)-3-oxopropanoate (0.350 g, 1.51 mmol), thiophene-2-carbaldehyde (0.220 mg, 1.97 mmol), glacial acetic acid (0.0417 g, 0.696 mmol), piperidine (15  $\mu$ L, 0.150 mmol) and benzene (20 mL) were mixed according to general method A to afford **10h** as an off-white solid (0.396 g, 81%) after 18 h. ( $R_f$  0.45, 20% EtOAc/Hex) [m.p. 153-155 °C]  $^1\text{H NMR}$  (300 MHz,  $\text{CDCl}_3$ )  $\delta$  ppm 8.28 (br. s., 1H), 8.04 (d,  $J$  = 0.37 Hz, 1H), 7.42 - 7.48 (m, 1H), 7.36 (d,  $J$  = 5.06 Hz, 1H), 7.29 - 7.33 (m, 1H), 7.23 - 7.29 (m, 2H), 6.95 - 7.00 (m, 1H), 6.39 (s, 1H), 3.79 (s, 3H), 2.50 (s, 3H).  $^{13}\text{C NMR}$  (75 MHz,  $\text{CDCl}_3$ )  $\delta$  ppm 165.3, 164.9, 136.9,



135.7, 135.1, 134.6, 132.5, 129.9, 128.0, 124.9, 124.2, 124.0, 119.7, 115.9, 111.0, 108.0, 52.8, 16.8. **IR:** 3104.8 (w), 2952.1 (w), 2927.5 (w), 1719.0 (s), 1675.8 (s), 1611.7 (s), 1455.9 (s), 1385.9 (s), 1342.5 (m), 1303.5 (s), 1253.5 (s), 1202.6 (s), 1086.3 (w), 1051.6 (w), 1027.9 (w), 992.9 (w), 858.1 (w), 750.5 (s), 717.4 (m)  $\text{cm}^{-1}$ . **HRMS (ESI) M/Z+** Calc. 325.0773, Obs. 325.0780.

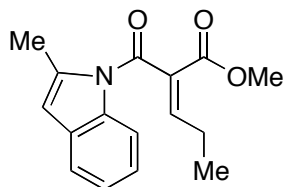

**(Z)-10i**

**(Z)-methyl 2-(2-methyl-1H-indole-1-carbonyl)pent-2-enoate (10i):** Methyl 3-(2-methyl-1H-indol-1-yl)-3-oxopropanoate (0.500 g, 2.16 mmol), propanaldehyde (0.155 mL, 2.16 mmol),  $\text{TiCl}_4 \cdot \text{THF}$  (1.44 g, 4.32 mmol),  $\text{CCl}_4$  (0.418 mL, 4.32 mmol), pyridine (0.699 mL, 8.65 mmol) and THF (35 mL) were combined according to general method B to yield **10i** as a clear oil (0.421 g, 72%) after 14 h. ( $R_f$  0.55, 20% EtOAc/Hex)  **$^1\text{H NMR}$**  (300 MHz,  $\text{CDCl}_3$ )  $\delta$  ppm 8.13 (br. s., 1H), 7.50 - 7.58 (m, 1H), 7.27 - 7.36 (m, 3H), 6.48 (d,  $J = 0.77$  Hz, 1H), 3.82 (s, 3H), 2.60 (s, 3H), 2.28 (quin,  $J = 7.63$  Hz, 2H), 1.13 (t,  $J = 7.53$  Hz, 3H).  **$^{13}\text{C NMR}$**  (75 MHz,  $\text{CDCl}_3$ )  $\delta$  ppm 165.1, 164.2, 150.7, 136.8, 136.5, 131.5, 129.8, 123.8, 123.7, 119.8, 115.2, 110.4, 52.5, 23.1, 16.9, 12.3. **IR:** 2973.6 (w), 2936.1 (w), 1726.6 (s), 1685.9 (s), 1643.0 (w), 1596.5 (w), 1575.5 (w), 1456.3 (s), 1436.9 (m), 1384.1 (s), 1310.8 (s), 1289.7 (s), 1243.9 (s), 1205.4 (w), 1036.7 (w), 989.8 (w), 783.4 (w), 750.3 (s)  $\text{cm}^{-1}$ . **HRMS (ESI) M/Z+** Calc. 271.1208, Obs. 271.1218.

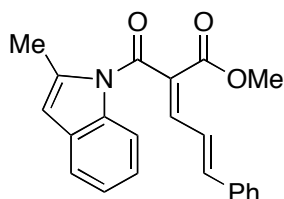

**(Z)-10j**

**(2Z, 4E)-Methyl 2-(2-methyl-1H-indole-1-carbonyl)-5-phenylpenta-2,4-dienoate (10j):** Methyl 3-(2-methyl-1H-indol-1-yl)-3-oxopropanoate (0.300 g, 1.30 mmol), cinnamaldehyde (0.21 mL, 1.69 mmol), glacial acetic acid (0.0357 g, 0.596 mmol), piperidine (13.97  $\mu\text{L}$ , 0.1297 mmol) and benzene (25 mL) were mixed according to general method A to afford **10j** as a reddish orange oil (0.256 g, 57%) after 20 h. ( $R_f$  0.48, 20% EtOAc/Hex)  **$^1\text{H NMR}$**  (300 MHz,  $\text{CDCl}_3$ )  $\delta$  ppm 8.10 - 8.18 (m, 1H), 7.76 (d,  $J = 11.73$  Hz, 1H), 7.45 - 7.51 (m, 1H), 7.34 - 7.42 (m, 2H), 7.23 - 7.34 (m, 5H), 7.12 (d,  $J = 15.39$  Hz, 1H), 6.82 - 6.95 (m, 1H), 6.42 (s, 1H), 3.74 (s, 3H), 2.54 (d,  $J = 0.99$  Hz, 3H).  **$^{13}\text{C NMR}$**  (75 MHz,  $\text{CDCl}_3$ )  $\delta$  ppm 165.1, 164.8, 145.4, 145.0, 136.7, 136.6, 135.1, 130.0, 129.7, 129.7, 129.0, 128.8, 128.5, 127.8, 123.9, 123.7, 122.2, 119.8, 115.3, 110.4, 52.6, 16.7. **IR:** 3030.0 (w), 2949.9 (w), 1721.0 (s), 1682.4 (s), 1614.7 (m), 1590.8 (m), 1456.2 (s), 1435.3 (m), 1384.9 (s), 1308.3 (s), 1278.6 (s), 1237.6 (s), 1202.0 (w), 1077.2 (w), 993.8 (w), 836.1 (w), 750.7 (s), 691.5 (w)  $\text{cm}^{-1}$ . **HRMS (ESI) M/Z+** Calc. 345.1365, Obs. 345.1383.

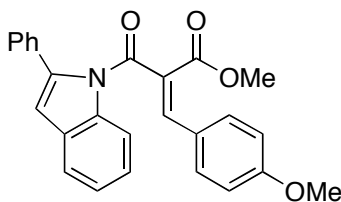

**(Z)-10k**

**(Z)-Methyl 3-(4-methoxyphenyl)-2-(2-phenyl-1H-indole-1-carbonyl)acrylate (10k):** Methyl 3-oxo-3-(2-phenyl-1H-indol-1-yl)propanoate (1.28 g, 4.36 mmol), 4-methoxybenzaldehyde (0.70 mL, 5.75 mmol), glacial acetic acid (0.131 g, 2.18 mmol), piperidine (50  $\mu$ L, 0.506 mmol) and benzene (120 mL) were mixed according to general method A to afford **10k** as a dark brown solid (0.456 g, 25%) after 18 h. ( $R_f$  0.37, 20% EtOAc/Hex) [m.p. 105-107 °C]  $^1\text{H NMR}$  (300 MHz,  $\text{CDCl}_3$ )  $\delta$  ppm 8.63 (d,  $J$  = 8.17 Hz, 1H), 7.40 - 7.51 (m, 2H), 7.29 - 7.38 (m, 2H), 7.19 - 7.27 (m, 2H), 7.16 (s, 1H), 7.00 - 7.13 (m, 4H), 6.54 - 6.61 (m, 2H), 6.34 (s, 1H), 3.73 (s, 3H), 3.71 (s, 3H).  $^{13}\text{C NMR}$  (75 MHz,  $\text{CDCl}_3$ )  $\delta$  ppm 166.8, 164.4, 161.5, 143.1, 139.8, 138.2, 133.4, 131.6, 129.6, 128.6, 127.8, 125.4, 125.2, 125.0, 124.3, 120.2, 116.6, 114.0, 111.9, 55.3, 52.3. IR: 3065.3 (w), 2951.7 (w), 2939.1 (w), 1720.6 (s), 1682.4 (s), 1600.9 (s), 1511.8 (s), 1452.5 (s), 1385.8 (m), 1321.3 (m), 1290.4 (m), 1258.9 (s), 1203.7 (m), 1172.3 (s), 1123.0 (m), 1056.1 (w), 1027.6 (m), 917.2 (w), 831.4 (m), 763.9 (s), 751.0 (s), 700.6 (m)  $\text{cm}^{-1}$ . HRMS (ESI)  $M/Z+$  Calc. 411.1471, Obs. 411.1480.

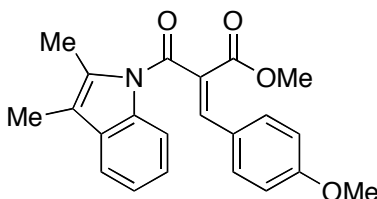

**(Z)-10l**

**(Z)-Methyl 2-(2,3-dimethyl-1H-indole-1-carbonyl)-3-(4-methoxyphenyl)acrylate (10l):** Methyl 3-(2,3-dimethyl-1H-indol-1-yl)-3-oxopropanoate (1.00 g, 4.08 mmol), 4-methoxybenzaldehyde (0.617 mL, 5.10 mmol), glacial acetic acid (0.112 g, 1.88 mmol), piperidine (0.0340 g, 0.407 mmol) and benzene (35 mL) were mixed according to general method A to afford **10l** as a yellow solid (1.080 g, 73%) after 18 h. ( $R_f$  0.25, 20% EtOAc/Hex) [m.p. 94-96 °C]  $^1\text{H NMR}$  (300 MHz,  $\text{CDCl}_3$ )  $\delta$  ppm 8.63 (br. s, 1H), 7.87 (br. s, 1H), 7.33 - 7.48 (m, 3H), 7.28 (br. s, 2H), 6.73 (d,  $J$  = 8.50 Hz, 2H), 3.77 (s, 3H), 3.67 (d,  $J$  = 1.21 Hz, 3H), 2.25 - 2.53 (s, 3H), 2.15 (s, 3H).  $^{13}\text{C NMR}$  (75 MHz,  $\text{CDCl}_3$ )  $\delta$  ppm 165.9, 165.2, 161.9, 142.5, 136.1, 131.8, 131.5, 126.6, 125.3, 124.3, 123.6, 117.9, 116.5, 114.6, 55.2, 52.4, 13.4, 8.6. IR: 3008.4 (w), 2933.3 (w), 2839.7 (w), 1721.5 (s), 1675.4 (s), 1601.6 (s), 1513.5 (s), 1458.5 (s), 1396.3 (m), 1306.8 (s), 1258.4 (s), 1203.4 (m), 1174.8 (s), 1133.5 (w), 1028.0 (w), 907.9 (w), 832.0 (w), 750.0 (s)  $\text{cm}^{-1}$ . HRMS (ESI)  $M/Z+$  Calc. 363.1471, Obs. 363.1470.

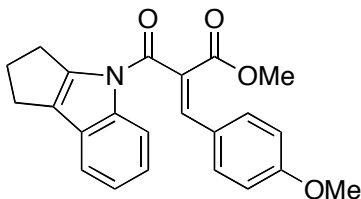

**(Z)-10m**

**(Z)-Methyl 3-(4-methoxyphenyl)-2-(1,2,3,4-tetrahydrocyclopenta[b]indole-4-carbonyl)acrylate (10m):**

Methyl 3-(2,3-dihydrocyclopenta[b]indol-4(1H)-yl)-3-oxopropanoate (0.175 g, 0.681 mmol), 4-methoxybenzaldehyde (0.107 mL, 0.885 mmol), glacial acetic acid (0.0187 g, 0.313 mmol), piperidine (6.8  $\mu$ L, 0.0680 mmol) and benzene (15 mL) were mixed according to general method A to afford **10m** as a white solid (0.0520 g, 20%) after 18 h. ( $R_f$  0.40, 20% EtOAc/Hex) [m.p. 156-158 °C]  $^1\text{H NMR}$  (300 MHz,  $\text{CDCl}_3$ )  $\delta$  ppm 8.64 - 8.72 (m, 1H), 7.82 (s, 1H), 7.24 - 7.44 (m, 5H), 6.75 - 6.82 (m, 2H), 3.80 (s, 3H), 3.75 (s, 3H), 2.60 - 2.80 (m, 4H), 2.25 - 2.50 (m, 2H).  $^{13}\text{C NMR}$  (75 MHz,  $\text{CDCl}_3$ )  $\delta$  ppm 165.5, 165.3, 161.8, 142.9, 141.7, 140.9, 132.0, 128.1, 127.4, 124.9, 124.5, 124.3, 124.2, 118.5, 117.7, 114.7, 55.3, 52.7, 28.9, 27.5, 23.8. IR: 2950.7 (w), 2857.5 (w), 1720.8 (m), 1681.7 (s), 1602.0 (s), 1513.5 (s), 1450.13 (m), 1392.8 (m), 1258.2 (s), 1173.02 (s), 1120.5 (w), 1103.5 (w), 1043.3 (w), 983.9 (w), 831.7 (w), 751.0 (m)  $\text{cm}^{-1}$ . HRMS (ESI) M/Z+ Calc. 375.1471, Obs. 375.1474.

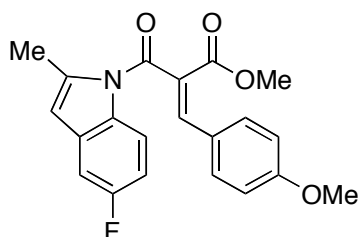

(Z)-10m

**(Z)-Methyl 2-(5-fluoro-2-methyl-1H-indole-1-carbonyl)-3-(4-methoxyphenyl)acrylate (10n):**

Methyl 3-(5-fluoro-2-methyl-1H-indol-1-yl)-3-oxopropanoate (0.301 g, 1.21 mmol), 4-methoxybenzaldehyde (0.180 mL, 1.48 mmol), glacial acetic acid (0.0520 g, 0.873 mmol), piperidine (25  $\mu$ L, 0.253 mmol) and benzene (30 mL) were mixed according to general method A to afford **10n** as a pale brick solid (0.382 g, 86%) after 18 h. ( $R_f$  0.43, 30% EtOAc/Hex) [m.p. 95-97 °C] (Temperature for the  $^1\text{H NMR}$  and  $^{13}\text{C NMR}$  = 60 °C)  $^1\text{H NMR}$  (300 MHz,  $\text{CDCl}_3$ )  $\delta$  ppm 8.25 (br s, 1H), 7.85 (s, 1H), 7.28 - 7.39 (m, 2H), 7.05 (dd,  $J$  = 2.57, 8.61 Hz, 1H), 6.95 (dt,  $J$  = 2.58, 9.12 Hz, 1H), 6.70 - 6.79 (m, 2H), 6.27 (s, 1H), 3.78 (s, 3H), 3.71 (s, 3H), 2.46 (s, 3H).  $^{13}\text{C NMR}$  (75 MHz,  $\text{CDCl}_3$ )  $\delta$  ppm 166.0, 165.0, 162.1, 161.5, 158.3, 143.0, 133.3, 131.8, 131.1 and 131.0 (doublet), 125.8, 124.9, 116.9, 114.6, 111.5, 111.2, 110.3, 105.5, 105.2, 55.2, 52.5, 16.5. IR: 2948.8 (w), 2903.6 (w), 1720.7 (m), 1685.4 (m), 1602.5 (s), 1513.7 (s), 1472.7 (m), 1448.5 (m), 1389.2 (m), 1301.5 (m), 1274.6 (s), 1260.5 (s), 1176.5 (s), 995.0 (w), 957.3 (w), 832.8 (w), 764.3 (s), 750.0 (s)  $\text{cm}^{-1}$ . HRMS (ESI) M/Z+ Calc. 367.1220, Obs. 367.1226.

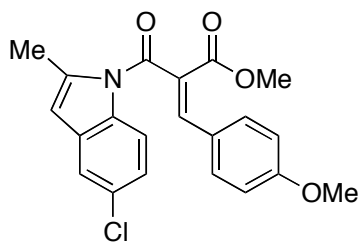

(Z)-10o

**(Z)-Methyl 2-(5-chloro-2-methyl-1H-indole-1-carbonyl)-3-(4-methoxyphenyl)acrylate (10o):**

Methyl 3-(5-chloro-2-methyl-1H-indol-1-yl)-3-oxopropanoate (0.565 g, 2.14 mmol), 4-methoxybenzaldehyde (0.337 mL, 2.77 mmol), glacial acetic acid (0.0589 g, 0.982 mmol), piperidine (21  $\mu$ L, 0.214 mmol) and benzene (30 mL) were mixed according to general method A to afford **10o** as an off-white solid (0.300 g, 37%) after 20 h. ( $R_f$  0.40, 20% EtOAc/Hex) [m.p. 111-113 °C] (Temperature for the  $^1\text{H NMR}$  and  $^{13}\text{C NMR}$  = 60 °C)  $^1\text{H NMR}$  (300 MHz,  $\text{CDCl}_3$ )  $\delta$  ppm 8.20 (d,  $J$  = 8.54 Hz, 1H), 7.86 (s, 1H), 7.30 - 7.40 (m, 3H), 7.20 (dd,  $J$  = 2.11, 8.85 Hz, 1H), 6.72 - 6.79 (m, 2H), 6.26 (s, 1H), 3.78 (s, 3H), 3.72 (s, 3H), 2.47 (s, 3H).  $^{13}\text{C}$

**NMR** (75 MHz, CDCl<sub>3</sub>) δ ppm 166.1, 164.9, 162.1, 143.2, 138.0, 135.4, 131.8, 131.2, 129.5, 125.8, 124.9, 124.1, 119.3, 116.7, 114.7, 109.8, 55.2, 52.5, 16.5. **IR**: 2952.3 (w), 2839.8 (w), 2360.1 (m), 2342.4 (m), 1718.7 (s), 1683.4 (s), 1597.9 (s), 1512.5 (s), 1442.9 (s), 1385.6 (s), 1345.9 (w), 1294.5 (m), 1255.6 (s), 1201.3 (m), 1171.5 (s), 1124.2 (w), 1072.5 (w), 1021.4 (w), 995.1 (w), 914.0 (w), 829.9 (m), 800.5 (w), 732.0 (w), 668.6 (w) cm<sup>-1</sup>. **HRMS (ESI)** M/Z+ Calc. 383.0924, Obs. 383.0922.

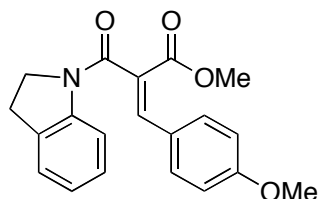

**12a**

**Methyl 2-(indoline-1-carbonyl)-3-(4-methoxyphenyl)acrylate (12a):** Methyl 3-(indolin-1-yl)-3-oxopropanoate (0.350 g, 1.60 mmol), 4-methoxybenzaldehyde (0.252 mL, 2.08 mmol), glacial acetic acid (0.0440 g, 0.734 mmol), piperidine (16 μL, 0.160 mmol) and benzene (30 mL) were mixed according to general method A to afford **12a** as an orange oil (0.390 g, 72%) after 20 h. (R<sub>f</sub> 0.35, 20% EtOAc/Hex) (*Diastereomers!*) **<sup>1</sup>H NMR** (300 MHz, CDCl<sub>3</sub>) δ ppm 8.41 (d, *J* = 8.03 Hz, 1.00), 7.82 (s, 0.20), 7.70 (s, 1.14), 7.43 - 7.54 (m, 2.47), 7.28 - 7.33 (m, 0.81), 7.16 - 7.22 (m, 1.27), 7.01 - 7.13 (m, 1.44), 6.80 - 6.88 (m, 2.53), 4.36 - 4.50 (m, 0.18), 4.18 - 4.31 (m, 0.20), 3.94 (br.s., 1.16), 3.83 (s, 3.16), 3.61 - 3.80 (m, 3.87), 3.71 - 3.76 (m, 1.78), 2.92 - 3.22 (m, 2.49). **<sup>13</sup>C NMR** (101 MHz, CDCl<sub>3</sub>) δ ppm 165.4, 165.0, 161.9, 142.6, 142.4, 140.6, 132.0, 131.8, 127.7, 126.0, 125.8, 124.6, 124.4, 117.5, 114.8, 114.5, 55.3, 52.4, 48.4, 28.0. **IR**: 3004.8 (w), 2951.7 (w), 2839.7 (w), 1716.9 (s), 1645.7 (s), 1598.9 (s), 1512.6 (s), 1482.3 (s), 1413.3 (m), 1255.3 (s), 1174.5 (s), 1126.4 (m), 1057.9 (m), 1027.4 (m), 832.3 (m), 755.8 (s), 668.5 (m) cm<sup>-1</sup>. **HRMS (ESI)** M/Z+ Calc. 337.1314, Obs. 337.1319.

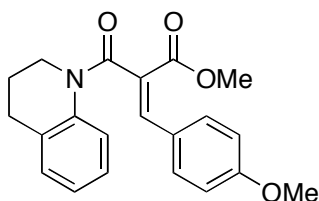

**(Z)-12b**

**(Z)-Methyl 3-(4-methoxyphenyl)-2-(1,2,3,4-tetrahydroquinoline-1-carbonyl)acrylate (12b):** Methyl 3-(3,4-dihydroquinolin-1(2*H*)-yl)-3-oxopropanoate (0.3500 g, 1.5010 mmol), 4-methoxybenzaldehyde (0.2370 mL, 1.9510 mmol), glacial acetic acid (0.0414 g, 0.6900 mmol), piperidine (14.80 μL, 0.1501 mmol) and benzene (30 mL) were mixed according to general method A to afford **12b** as a orange oil (0.4230 g, *Crude* = 80%) after 15 h. (R<sub>f</sub> 0.35, 20% EtOAc/Hex) **HRMS (ESI)** M/Z+ Calc. 351.1471, Obs. 351.1499.

### C. In(OTf)<sub>3</sub>-Catalyzed Cyclizations

**General Procedure:** To a mixture of In(OTf)<sub>3</sub> (0.10-0.15 equiv.) in 1,2-DCE (or toluene) heated to a reflux, dissolved **10** (or **12**) (1.0 equiv) was syringed into the reaction vessel. The reaction was monitored by TLC and quenched with water. The phases were separated, and the product was extracted from the aqueous phase with DCM. The combined organic layers were washed with brine, dried over Mg<sub>2</sub>SO<sub>4</sub>, filtered, and concentrated for column chromatography using silica gel.

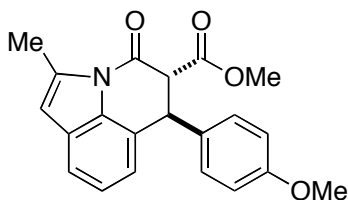

**11a**

**Methyl 6-(4-methoxyphenyl)-2-methyl-4-oxo-5,6-dihydro-4H-pyrrolo[3,2,1-*ij*]quinoline-5-carboxylate (11a):** Methyl 3-(4-methoxyphenyl)-2-(2-methyl-1H-indole-1-carbonyl)acrylate (0.258 g, 0.739 mmol), In(OTf)<sub>3</sub> (0.0428 g, 0.0760 mmol) and 1,2-DCE (13 mL) were combined according to the general procedure to afford **11a** as a brown solid (0.161 g, 63%) after 3 h. (*R<sub>f</sub>* 0.35, 20% EtOAc/Hex) [m.p. 122-124 °C] *Diastereomeric ratio:* (50:1). <sup>1</sup>H NMR (300 MHz, CDCl<sub>3</sub>) δ ppm 7.31 - 7.37 (m, 1H), 7.14 - 7.20 (m, 2H), 7.08 - 7.13 (m, 1H), 6.84 - 6.92 (m, 2H), 6.71 (d, *J* = 7.48 Hz, 1H), 6.41 (d, *J* = 1.25 Hz, 1H), 4.96 (d, *J* = 10.85 Hz, 1H), 4.19 (d, *J* = 10.88 Hz, 1H), 3.81 (s, 3H), 3.68 (s, 3H), 2.71 (d, *J* = 1.03 Hz, 3H). <sup>13</sup>C NMR (75 MHz, CDCl<sub>3</sub>) δ ppm 169.0, 164.0, 159.0, 137.2, 134.9, 130.9, 129.6, 127.4, 124.0, 122.7, 121.0, 118.4, 114.3, 109.4, 58.8, 55.2, 52.6, 45.3, 15.2. IR: 2954.7 (w), 2922.5 (w), 2850.5 (w), 1749.6 (s), 1709.3 (s), 1611.6 (w), 1513.5 (s), 1443.5 (s), 1381.8 (s), 1340.9 (s), 1252.6 (s), 1178.9 (w), 1153.2 (m), 1032.8 (m), 818.6 (m), 764.7 (m), 749.1 (s) cm<sup>-1</sup>. HRMS (ESI) *M/Z*+ Calc. 349.1314, Obs. 349.1310.

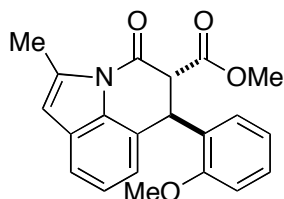

**11b**

**Methyl 6-(2-methoxyphenyl)-2-methyl-4-oxo-5,6-dihydro-4H-pyrrolo[3,2,1-*ij*]quinoline-5-carboxylate (11b):** Methyl 3-(2-methoxyphenyl)-2-(2-methyl-1H-indole-1-carbonyl)acrylate (0.060 g, 0.172 mmol), In(OTf)<sub>3</sub> (0.0145 g, 0.0250 mmol) and toluene (4 mL) were combined according to the general procedure to afford **11b** as a clear oil (0.0522 g, 87% for combined *cis* and *trans* isomers) after 3 h. (*R<sub>f</sub>* 0.35, 20% EtOAc/Hex) *Diastereomeric ratio:* (3.7:1). (*trans*-Diastereomer chemical shifts reported) <sup>1</sup>H NMR (400 MHz, CDCl<sub>3</sub>) δ ppm 7.33 (d, *J* = 7.72 Hz, 1H), 7.23 - 7.29 (m, 1H), 7.11 (t, *J* = 7.62 Hz, 1H), 6.83 - 6.94 (m, 3H), 6.76 (d, *J* = 7.47 Hz, 1H), 6.40 (d, *J* = 1.13 Hz, 1H), 5.26 (d, *J* = 7.72 Hz, 1H), 4.41 (d, *J* = 7.65 Hz, 1H), 3.75 (s, 3H), 3.67 (s, 3H), 2.72 (d, *J* = 0.94 Hz, 3H). <sup>13</sup>C NMR (101 MHz, CDCl<sub>3</sub>) δ ppm 169.4, 164.4, 157.3, 137.2, 135.1, 129.7, 129.0, 127.7, 127.4, 124.0, 121.8, 120.9, 120.6, 118.1, 111.2, 109.2, 56.2, 55.4, 52.7, 41.8, 15.2. IR: 3065.0 (w), 3032.3 (w), 3003.1 (m), 2954.0 (m), 2839.0 (m), 1745.7 (s), 1707.2 (s), 1627.5 (w), 1600.6 (w), 1586.6 (w), 1573.3 (w), 1493.3 (m), 1443.7 (m), 1380.9 (m), 1338.7 (m), 1287.0 (m), 1210.6 (s), 1154.0 (m), 1119.0 (m), 1047.7 (w), 1026.1 (m), 967.6 (m), 911.8 (m), 820.2 (w), 748.8 (m), 732.9 (m) cm<sup>-1</sup>. HRMS (ESI) *M/Z*+ Calc. 349.1314, Obs. 349.1328.

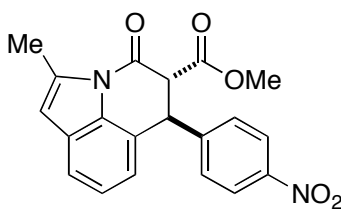

**11c**

**trans-Methyl 2-methyl-6-(4-nitrophenyl)-4-oxo-5,6-dihydro-4H-pyrrolo[3,2,1-*ij*]quinoline-5-carboxylate (11c):** Methyl 2-(2-methyl-1*H*-indole-1-carbonyl)-3-(4-nitrophenyl)acrylate (0.070 g, 0.1922 mmol), In(OTf)<sub>3</sub> (0.0162 g, 0.0288 mmol) and toluene (4 mL) were combined according to the general procedure to afford **11c** as an orange oil (0.0548 g, 78% for combined *cis* and *trans* isomers) after 14 h. (*R<sub>f</sub>* 0.40, 20% EtOAc/Hex) *Diastereomeric ratio*: (2.4:1) (*trans*-Diastereomer chemical shifts reported) **<sup>1</sup>H NMR** (300 MHz, CDCl<sub>3</sub>) δ ppm 8.19 - 8.28 (m, 2H), 7.42 - 7.50 (m, 2H), 7.39 (d, *J* = 7.77 Hz, 1H), 7.15 (t, *J* = 7.64 Hz, 1H), 6.64 (d, *J* = 7.48 Hz, 1H), 6.45 (d, *J* = 1.21 Hz, 1H), 5.16 (d, *J* = 10.44 Hz, 1H), 4.21 (d, *J* = 10.44 Hz, 1H), 3.69 (s, 3H), 2.71 (d, *J* = 1.17 Hz, 3H). **<sup>13</sup>C NMR** (75 MHz, CDCl<sub>3</sub>) δ ppm 168.4, 163.0, 147.6, 146.8, 137.6, 129.6, 127.8, 124.3, 124.2, 120.8, 120.6, 119.2, 109.6, 58.0, 53.0, 45.8, 15.2. **IR**: 3066.3 (w), 2955.2 (w), 2923.9 (w), 2850.9 (w), 1746.1 (s), 1709.3 (s), 1606.7 (w), 1519.4 (s), 1444.4 (s), 1381.0 (s), 1345.7 (s), 1285.8 (m), 1268.1 (m), 1211.2 (w), 1154.5 (s), 1109.6 (w), 1048.0 (w), 1008.1 (w), 967.4 (w), 863.3 (m), 819.5 (m), 748.9 (s), 735.0 (s), 706.7 (m), 611.3 (w) cm<sup>-1</sup>. **HRMS (ESI) M/Z+** Calc. 364.1059, Obs. 364.1048.

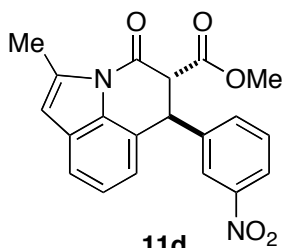

**11d**

**Methyl 2-methyl-6-(3-nitrophenyl)-4-oxo-5,6-dihydro-4H-pyrrolo[3,2,1-*ij*]quinoline-5-carboxylate (11d):** Methyl 2-(2-methyl-1*H*-indole-1-carbonyl)-3-(3-nitrophenyl)acrylate (0.100 g, 0.275 mmol), In(OTf)<sub>3</sub> (0.0231 g, 0.0411 mmol) and 1,2-DCE (4 mL) were combined according to the general procedure to afford **11d** as an off-white solid (0.0861 g, 86% for combined *cis* and *trans* isomers) after 13 h. (*R<sub>f</sub>* 0.35, 20% EtOAc/Hex) [*m.p.* 106-108 °C] *Diastereomeric ratio*: (2.2:1). (*trans*-Diastereomer chemical shifts reported) **<sup>1</sup>H NMR** (300 MHz, CDCl<sub>3</sub>) δ ppm 8.19 - 8.28 (m, 2H), 7.42 - 7.50 (m, 2H), 7.39 (d, *J* = 7.77 Hz, 1H), 7.15 (t, *J* = 7.64 Hz, 1H), 6.64 (d, *J* = 7.48 Hz, 1H), 6.43 - 6.46 (m, 1H), 5.16 (d, *J* = 10.44 Hz, 1H), 4.21 (d, *J* = 10.44 Hz, 1H), 3.69 (s, 3H), 2.71 (d, *J* = 1.17 Hz, 3H). **<sup>13</sup>C NMR** (75 MHz, CDCl<sub>3</sub>) δ ppm 168.4, 163.0, 147.6, 146.8, 137.6, 129.6, 127.8, 125.0, 124.3, 124.2, 120.8, 120.6, 119.2, 109.6, 58.0, 53.0, 45.8, 15.2. **IR**: 3066.6 (w), 2955.3 (w), 2923.4 (w), 1746.0 (s), 1708.6 (s), 1530.3 (s), 1444.0 (s), 1380.6 (s), 1346.0 (s), 1286.5 (m), 1267.1 (m), 1154.2 (s), 1052.1 (w), 1003.0 (w), 966.4 (w), 904.1 (w), 817.3 (m), 738.9 (s), 709.5 (m), 613.4 (m) cm<sup>-1</sup>. **HRMS (ESI) M/Z+** Calc. 364.1059, Obs. 364.1055.

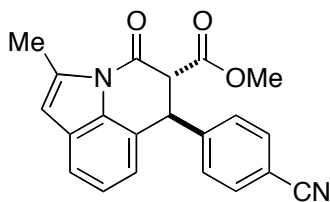

**11e**

**Methyl 6-(4-cyanophenyl)-2-methyl-4-oxo-5,6-dihydro-4H-pyrrolo[3,2,1-*ij*]quinoline-5-carboxylate (11e):** Methyl 3-(4-cyanophenyl)-2-(2-methyl-1H-indole-1-carbonyl)acrylate (0.0900 g, 0.263 mmol), In(OTf)<sub>3</sub> (0.0220 g, 0.0392 mmol) and 1,2-DCE (4 mL) were combined according to the general procedure to afford **11e** as a pale orange solid (0.0704 g, 78% for combined *cis* and *trans* isomers) after 14 h. (*R<sub>f</sub>* 0.35, 20% EtOAc/Hex) [m.p. 155-157 °C] *Diastereomeric ratio*: (1.85:1). (*trans*-diastereomer chemical shifts reported) <sup>1</sup>H NMR (300 MHz, CDCl<sub>3</sub>) δ ppm 7.66 (d, *J* = 8.25 Hz, 2H), 7.38 (d, *J* = 7.88 Hz, 3H), 7.14 (t, *J* = 7.62 Hz, 1H), 6.64 (d, *J* = 7.44 Hz, 1H), 6.44 (d, *J* = 0.92 Hz, 1H), 5.09 (d, *J* = 10.30 Hz, 1H), 4.18 (d, *J* = 10.30 Hz, 1H), 3.69 (s, 3H), 2.71 (s, 3H). <sup>13</sup>C NMR (75 MHz, CDCl<sub>3</sub>) δ ppm 168.4, 163.1, 144.8, 137.5, 132.8, 129.4, 127.7, 124.3, 120.8, 120.6, 119.1, 118.4, 112.0, 109.6, 58.0, 52.9, 46.0, 15.2. IR: 2955.3 (w), 2922.9 (w), 2229.2 (w), 1748.4 (s), 1712.4 (s), 1532.6 (w), 1445.2 (s), 1383.0 (s), 1344.2 (m), 1275.0 (s), 1262.2 (s), 1156.3 (m), 819.0 (w), 749.7 (s) cm<sup>-1</sup>. HRMS (ESI) *M/Z*+ Calc. 344.1161, Obs. 344.1172.

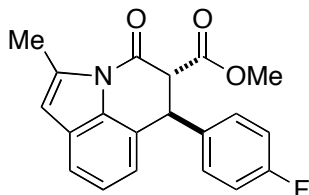

**11f**

**Methyl 6-(4-fluorophenyl)-2-methyl-4-oxo-5,6-dihydro-4H-pyrrolo[3,2,1-*ij*]quinoline-5-carboxylate (11f):** Methyl 3-(4-fluorophenyl)-2-(2-methyl-1H-indole-1-carbonyl)acrylate (0.0760 g, 0.225 mmol), In(OTf)<sub>3</sub> (0.0188 g, 0.0330 mmol) and 1,2-DCE (8 mL) were combined according to the general procedure to afford **11f** as a yellow solid (0.0716 g, 94% for combined *cis* and *trans* isomers) after 1 h. (*R<sub>f</sub>* 0.68, 30% EtOAc/Hex) [m.p. 153-155 °C] *Diastereomeric ratio*: (2.6:1) (*trans*-Diastereomer chemical shifts reported) <sup>1</sup>H NMR (300 MHz, CDCl<sub>3</sub>) δ ppm 7.36 (d, *J* = 7.77 Hz, 1H), 7.19 - 7.25 (m, 2H), 7.13 (t, *J* = 7.62 Hz, 1H), 7.00 - 7.09 (m, 2H), 6.68 (d, *J* = 7.44 Hz, 1H), 6.42 (d, *J* = 1.17 Hz, 1H), 5.01 (d, *J* = 10.85 Hz, 1H), 4.18 (d, *J* = 10.85 Hz, 1H), 3.68 (s, 3H), 2.71 (s, 3H). <sup>13</sup>C NMR (75 MHz, CDCl<sub>3</sub>) δ ppm 168.8, 163.7, 137.3, 134.8, 130.2 and 130.1 (doublet), 127.5, 124.2, 122.1, 120.9, 118.7, 116.1, 115.8, 109.5, 77.2, 58.7, 52.7, 45.4, 15.2. IR: 3058.4 (w), 2954.5 (w), 2923.0 (w), 1746.8 (s), 1708.7 (s), 1605.3 (w), 1509.8 (s), 1443.8 (s), 1380.9 (s), 1340.0 (s), 1267.9 (m), 1224.3 (s), 1159.1 (s), 1097.6 (w), 1051.5 (w), 1010.0 (w), 967.1 (w), 818.5 (m), 748.7 (s) cm<sup>-1</sup>. HRMS (ESI) *M/Z*+ Calc. 337.1114, Obs. 337.1115.

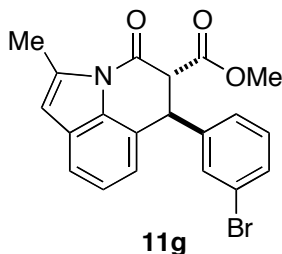

**11g**

**Methyl 6-(3-bromophenyl)-2-methyl-4-oxo-5,6-dihydro-4H-pyrrolo[3,2,1-ij]quinoline-5-carboxylate (11g):** Methyl 3-(3-bromophenyl)-2-(2-methyl-1H-indole-1-carbonyl)acrylate (0.100 g, 0.252 mmol), In(OTf)<sub>3</sub> (0.0213 g, 0.0377 mmol) and 1,2-DCE (4 mL) were combined according to the general procedure to afford **11g** as a pale yellow solid (0.0614 g, 61%) after 14 h. (*R<sub>f</sub>* 0.40, 20% EtOAc/Hex) [m.p. 123-125 °C] *Diastereomeric ratio*: (8.3:1). (*trans*-Diastereomer chemical shifts reported) <sup>1</sup>H NMR (300 MHz, CDCl<sub>3</sub>) δ ppm 7.41 - 7.49 (m, 2H), 7.33 - 7.39 (m, 1H), 7.10 - 7.27 (m, 3H), 6.69 (d, *J* = 7.48 Hz, 1H), 6.43 (d, *J* = 0.92 Hz, 1H), 4.98 (d, *J* = 10.59 Hz, 1H), 4.19 (d, *J* = 10.63 Hz, 1H), 3.70 (s, 3H), 2.71 (s, 3H). <sup>13</sup>C NMR (75 MHz, CDCl<sub>3</sub>) δ ppm 168.7, 163.4, 141.6, 137.3, 134.8, 131.5, 131.1, 130.5, 127.5, 127.2, 124.2, 122.9, 121.4, 120.9, 118.8, 109.5, 58.3, 52.8, 45.7, 15.2. IR: 2961.7 (w), 2921.4 (w), 1750.2 (s), 1711.7 (s), 1570.7 (w), 1474.8 (w), 1444.8 (s), 1381.9 (s), 1341.5 (s), 1275.8 (s), 1261.6 (m), 1155.6 (m), 764.3 (s), 749.7 (s) cm<sup>-1</sup>. HRMS (ESI) *M/Z*+ Calc. 397.0314, Obs. 397.0315.

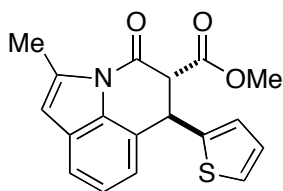

**11h**

***trans*-Methyl 2-methyl-4-oxo-6-(thiophen-2-yl)-5,6-dihydro-4H-pyrrolo[3,2,1-ij]quinoline-5-carboxylate (11h):** Methyl 2-(2-methyl-1H-indole-1-carbonyl)-3-(thiophen-2-yl)acrylate (0.0900 g, 0.277 mmol), In(OTf)<sub>3</sub> (0.0233 g, 0.0415 mmol) and 1,2-DCE (4 mL) were combined according to the general procedure to afford **11h** as an off-white solid (0.0459 g, 51%) after 14 h. (*R<sub>f</sub>* 0.40, 20% EtOAc/Hex) [m.p. 153-155 °C] (*Single Diastereomer*) <sup>1</sup>H NMR (300 MHz, CDCl<sub>3</sub>) δ ppm 7.37 (d, *J* = 7.70 Hz, 1H), 7.23 - 7.28 (m, 1H), 7.17 (t, *J* = 7.62 Hz, 1H), 6.91 - 6.99 (m, 3H), 6.42 (s, 1H), 5.32 (d, *J* = 9.45 Hz, 1H), 4.25 (d, *J* = 9.45 Hz, 1H), 3.72 (s, 3H), 2.70 (s, 3H). <sup>13</sup>C NMR (75 MHz, CDCl<sub>3</sub>) δ ppm 169.0, 163.8, 142.6, 137.8, 134.8, 128.0, 127.4, 127.0, 125.7, 124.6, 122.2, 121.3, 119.4, 109.9, 59.7, 53.3, 41.7, 15.6. IR: 2961.2 (w), 2927.0 (w), 1751.0 (s), 1712.1 (s), 1445.7 (s), 1382.5 (s), 1341.1 (s), 1275.5 (s), 1267.3 (m), 1156.4 (m), 1042.5 (w), 1004.0 (w), 748.9 (s), 702.5 (w) cm<sup>-1</sup>. HRMS (ESI) *M/Z*+ Calc. 325.0773, Obs. 325.0754.

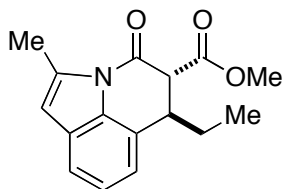

**11i**

**Methyl 6-ethyl-2-methyl-4-oxo-5,6-dihydro-4H-pyrrolo[3,2,1-ij]quinoline-5-carboxylate (11i):** Methyl 2-(2-methyl-1H-indole-1-carbonyl)pent-2-enoate (0.090 g, 0.332 mmol), In(OTf)<sub>3</sub> (0.0559 g, 0.0995 mmol) and toluene (5 mL) were combined according to the general procedure to afford **11i** as a clear oil (0.0754 g, 84%) after 12 h. (*R<sub>f</sub>* 0.40, 20% EtOAc/Hex) [m.p. 108-110 °C] *Diastereomeric ratio*: (25:1). (*trans*-Diastereomer chemical shifts reported) <sup>1</sup>H NMR (300 MHz, CDCl<sub>3</sub>) δ ppm 7.33 (d, *J* = 7.48 Hz, 1H), 7.18 (t, *J* = 7.55 Hz, 1H), 7.06 (d, *J* = 6.00 Hz, 1H), 6.35 - 6.39 (m, 1H), 3.86 (d, *J* = 4.69 Hz, 1H), 3.61 - 3.71 (m, 4H), 2.66 - 2.73 (m, 3H), 1.78 - 1.95 (m, 1H), 1.61 - 1.77 (m, 1H), 0.95 (t, *J* = 7.40 Hz, 3H). <sup>13</sup>C NMR (75 MHz, CDCl<sub>3</sub>) δ ppm 169.6, 164.3, 136.9, 134.6, 127.5, 123.7, 121.7, 120.6, 118.1, 109.2, 55.8, 52.8, 41.5, 27.2, 15.1, 10.6. IR: 2963.1 (w), 2927.6 (w), 1743.0 (w), 1715.0 (s), 1629.2 (s), 1573.2 (w), 1447.6 (w),



1381.4 (s), 1328.6 (m), 1274.9 (m), 1259.8 (m), 1194.6 (w), 1160.3 (w), 821.1 (w), 763.4 (m), 750.0 (s)  $\text{cm}^{-1}$ . **HRMS (ESI) M/Z+** Calc. 271.1208, Obs. 271.1208.

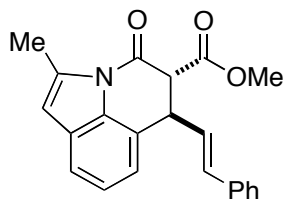

**11j**

**(E)-methyl 2-methyl-4-oxo-6-styryl-5,6-dihydro-4H-pyrrolo[3,2,1-ij]quinoline-5-carboxylate (11j):** Methyl 2-(2-methyl-1H-indole-1-carbonyl)-5-phenylpenta-2,4-dienoate (0.0700 g, 0.203 mmol),  $\text{In}(\text{OTf})_3$  (0.0341 g, 0.0608 mmol) and toluene (4 mL) were combined according to the general procedure to afford **11j** as a pale yellow solid (0.0457 g, 65%) after 14 h. ( $R_f$  0.35, 20% EtOAc/Hex) [**m.p.** 98-100 °C] *Diastereomeric ratio:* (20:1). (*trans*-Diastereomer chemical shifts reported)  **$^1\text{H NMR}$**  (300 MHz,  $\text{CDCl}_3$ )  $\delta$  ppm 7.26 - 7.43 (m, 6H), 7.21 (t,  $J = 7.57$  Hz, 1H), 7.08 (d,  $J = 7.40$  Hz, 1H), 6.63 (d,  $J = 15.68$  Hz, 1H), 6.40 (d,  $J = 1.14$  Hz, 1H), 6.24 (dd,  $J = 8.65, 15.68$  Hz, 1H), 4.58 (t,  $J = 9.44$  Hz, 1H), 4.00 (d,  $J = 10.22$  Hz, 1H), 3.78 (s, 3H), 2.70 (d,  $J = 1.10$  Hz, 3H).  **$^{13}\text{C NMR}$**  (75 MHz,  $\text{CDCl}_3$ )  $\delta$  ppm 169.0, 164.0, 137.2, 136.2, 134.6, 134.5, 128.6, 128.0, 127.6, 126.5, 126.4, 124.1, 121.0, 120.5, 118.8, 109.3, 56.7, 52.8, 43.9, 15.2. **IR:** 3026.9 (w), 2952.8 (w), 2922.4 (w), 1749.6 (s), 1709.8 (s), 1444.3 (s), 1380.9 (s), 1340.2 (m), 1276.0 (m), 1260.8 (m), 1200.1 (w), 1151.3 (m), 968.1 (w), 813.1 (w), 749.0 (s), 695.0 (m)  $\text{cm}^{-1}$ . **HRMS (ESI) M/Z+** Calc. 345.1365, Obs. 345.1360.

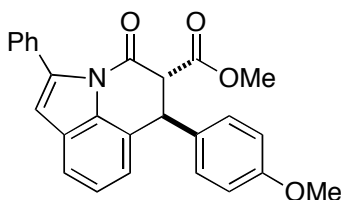

**11k**

**Methyl 6-(4-methoxyphenyl)-4-oxo-2-phenyl-5,6-dihydro-4H-pyrrolo[3,2,1-ij]quinoline-5-carboxylate (11k):** Methyl 3-(4-methoxyphenyl)-2-(2-phenyl-1H-indole-1-carbonyl)acrylate (0.160 g, 0.390 mmol),  $\text{In}(\text{OTf})_3$  (0.0223 g, 0.0400 mmol) and 1,2-DCE (13 mL) were combined according to the general procedure to afford **11k** as a reddish orange solid (0.155 g, 97%) after 3 h. ( $R_f$  0.33, 20% EtOAc/Hex) [**m.p.** 108-110 °C] *Diastereomeric ratio:* (17.3:1). (*trans*-Diastereomer chemical shifts reported)  **$^1\text{H NMR}$**  (300 MHz,  $\text{CDCl}_3$ )  $\delta$  ppm 8.16 - 8.22 (m, 1H), 7.71 - 7.76 (m, 1H), 7.16 - 7.45 (m, 7H), 7.02 - 7.09 (m, 2H), 6.71 - 6.77 (m, 2H), 5.19 (d,  $J = 4.40$  Hz, 1H), 4.05 (d,  $J = 4.43$  Hz, 1H), 3.86 (s, 3H), 3.73 (s, 3H).  **$^{13}\text{C NMR}$**  (75 MHz,  $\text{CDCl}_3$ )  $\delta$  ppm 168.0, 164.9, 158.9, 139.4, 134.4, 132.0, 131.7, 130.5, 128.4, 128.4, 128.4, 127.0, 124.9, 124.5, 120.2, 116.7, 114.3, 114.1, 63.0, 55.2, 53.3, 42.7. **IR:** 3056.9 (w), 2953.2 (w), 2837.9 (w), 1730.5 (s), 1610.2 (s), 1511.9 (s), 1454.6 (s), 1392.4 (s), 1345.1 (m), 1305.2 (m), 1246.7 (s), 1145.4 (s), 1103.0 (w), 1029.6 (s), 830.8 (m), 748.6 (s), 699.8 (s), 628.6 (m)  $\text{cm}^{-1}$ . **HRMS (ESI) M/Z+** Calc. 411.1471, Obs. 411.1470.

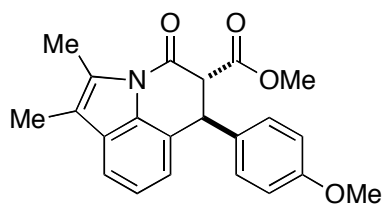

11l

**Methyl 6-(4-methoxyphenyl)-1,2-dimethyl-4-oxo-5,6-dihydro-4H-pyrrolo[3,2,1-*ij*]quinoline-5-carboxylate (11l):** Methyl 2-(2,3-dimethyl-1H-indole-1-carbonyl)-3-(4-methoxyphenyl)acrylate (0.0900 g, 0.2476 mmol), In(OTf)<sub>3</sub> (0.0208 g, 0.0371 mmol) and DCE (5 mL) were combined according to the general procedure to afford **11l** as a clear oil (0.7740 g, 86%) after 4 h. *R<sub>f</sub>* 0.40 (20% EtOAc/Hex). *Diastereomeric ratio:* (Single Diastereomer observed) <sup>1</sup>H NMR (400 MHz, CDCl<sub>3</sub>) δ ppm 7.31 (d, *J* = 7.72 Hz, 1H), 7.12 - 7.19 (m, 3H), 6.85 - 6.89 (m, 2H), 6.72 (d, *J* = 7.47 Hz, 1H), 4.94 (d, *J* = 10.60 Hz, 1H), 4.17 (d, *J* = 10.60 Hz, 1H), 3.81 (s, 3H), 3.68 (s, 3H), 2.64 (d, *J* = 0.82 Hz, 3H), 2.22 (d, *J* = 0.88 Hz, 3H). <sup>13</sup>C NMR (101 MHz, CDCl<sub>3</sub>) δ ppm 169.2, 163.6, 159.0, 134.0, 132.3, 131.2, 129.5, 129.1, 123.9, 122.5, 121.1, 116.9, 116.7, 114.3, 58.9, 55.2, 52.6, 45.2, 12.4, 8.6. IR: 3035.9 (w), 2999.5 (w), 2953.5 (m), 2924.2 (m), 2837.8 (m), 1747.0 (s), 1700.9 (s), 1627.9 (w), 1610.8 (m), 1585.2 (w), 1512.4 (s), 1452.4 (s), 1378.4 (s), 1353.9 (s), 1338.2 (s), 1286.7 (m), 1250.0 (s), 1211.6 (m), 1178.1 (m), 1155.5 (s), 1136.1 (w), 1112.2 (w), 1030.9 (m), 980.7 (w), 912.6 (w), 850.7 (w), 822.5 (w), 792.4 (w), 768.1 (w), 746.4 (m), 731.9 (m), 610.7 (w) cm<sup>-1</sup>. HRMS (ESI) *M/Z*+ Calc. 363.1471, Obs. 363.1465.

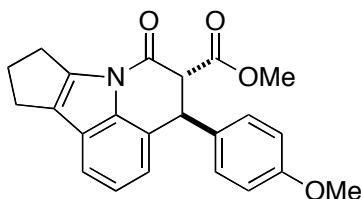

11m

**trans-Methyl 4-(4-methoxyphenyl)-6-oxo-4,5,6,8,9,10-hexahydrocyclopenta[4,5]pyrrolo[3,2,1-*ij*]quinoline-5-carboxylate (11m):** Methyl 3-(4-methoxyphenyl)-2-(1,2,3,4-tetrahydrocyclopenta[*b*]indole-4-carbonyl)acrylate (0.0450 g, 0.120 mmol), In(OTf)<sub>3</sub> (0.0101 g, 0.0178 mmol) and toluene (3 mL) were combined according to the general procedure to afford **11m** as a white solid (0.0369 g, 82%) after 12 h. (*R<sub>f</sub>* 0.40, 20% EtOAc/Hex) [*m.p.* 140-142 °C] (Single Diastereomer observed) <sup>1</sup>H NMR (300 MHz, CDCl<sub>3</sub>) δ ppm 7.39 - 7.47 (m, 2H), 7.13 - 7.29 (m, 2H), 7.03 - 7.09 (m, 1H), 6.76 - 6.82 (m, 2H), 3.91 (s, 1H), 3.89 (d, *J* = 0.40 Hz, 3H), 3.75 (s, 3H), 3.74 (s, 1H), 2.49 (td, *J* = 5.46, 13.07 Hz, 1H), 2.29 - 2.41 (m, 1H), 2.03 - 2.27 (m, 2H), 1.75 - 1.87 (m, 2H). <sup>13</sup>C NMR (75 MHz, CDCl<sub>3</sub>) δ ppm 170.4, 169.2, 160.6, 147.1, 141.0, 140.0, 133.9, 128.1, 126.3, 125.9, 123.3, 117.4, 114.6, 109.6, 91.5, 67.9, 59.9, 55.5, 53.0, 51.7, 37.7, 36.3, 26.3. IR: 3059.4 (w), 2953.0 (w), 2867.2 (w), 1737.7 (s), 1708.1 (s), 1601.1 (m), 1579.5 (w), 1487.4 (m), 1474.2 (m), 1480.2 (m), 1352.9 (m), 1331.6 (m), 1304.1 (m), 1272.9 (s), 1227.6 (s), 1174.0 (m), 1156.2 (m), 1111.4 (w), 1096.0 (w), 1029.9 (s), 863.2 (w), 844.6 (w), 821.6 (w), 752.2 (s), 734.8 (s), 712.7 (m) cm<sup>-1</sup>. HRMS (ESI) *M/Z*+ Calc. 375.1471, Obs. 375.1476.

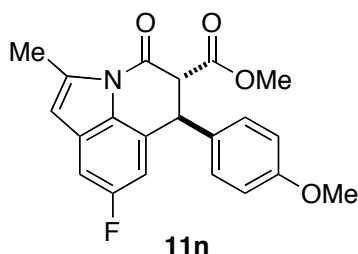

**trans-Methyl 8-fluoro-6-(4-methoxyphenyl)-2-methyl-4-oxo-5,6-dihydro-4H-pyrrolo[3,2,1-*ij*]quinoline-5-carboxylate (11n):** Methyl 2-(5-fluoro-2-methyl-1*H*-indole-1-carbonyl)-3-(4-methoxyphenyl)acrylate (0.0750 g, 0.204 mmol), In(OTf)<sub>3</sub> (0.0180 g, 0.0320 mmol) and 1,2-DCE (7 mL) were combined according to the general procedure to afford **11n** as a yellow solid (0.660 g, 88%) after 12 h. (*R<sub>f</sub>* 0.40, 20% EtOAc/Hex) [m.p. 106-108 °C] (Single Diastereomer Observed) <sup>1</sup>H NMR (400 MHz, CDCl<sub>3</sub>) δ ppm 7.13 - 7.18 (m, 2H), 7.01 (ddd, *J* = 0.63, 2.21, 8.96 Hz, 1H), 6.86 - 6.91 (m, 2H), 6.43 - 6.48 (m, 1H), 6.37 - 6.39 (m, 1H), 4.92 (d, *J* = 10.79 Hz, 1H), 4.17 (d, *J* = 10.85 Hz, 1H), 3.81 (s, 3H), 3.68 (s, 3H), 2.70 (d, *J* = 1.19 Hz, 3H). <sup>13</sup>C NMR (101 MHz, CDCl<sub>3</sub>) δ ppm 168.8, 163.7, 161.7, 159.3, 159.2, 138.7, 131.1, 130.3, 129.5, 128.1 and 128.0 (doublet), 124.0 and 123.9 (doublet), 114.4, 109.2, 109.2, 109.1, 108.9, 104.7, 104.4, 58.5, 55.2, 52.7, 45.3, 15.2. IR: 3001.9 (w), 2954.8 (w), 2838.9 (w), 1747.3 (s), 1709.5 (s), 1632.7 (m), 1610.7 (m), 1513.3 (s), 1479.6 (s), 1435.4 (s), 1381.4 (s), 1327.8 (m), 1254.6 (s), 1210.5 (s), 1156.7 (s), 1112.8 (s), 1031.8 (s), 961.2 (m), 852.7 (s), 832.2 (s), 741.1 (s), 714.0 (m), 619.6 (m) cm<sup>-1</sup>. HRMS (ESI) *M/Z*+ Calc. 367.1220, Obs. 367.1227.

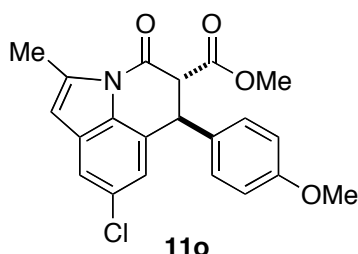

**Methyl 8-chloro-6-(4-methoxyphenyl)-2-methyl-4-oxo-5,6-dihydro-4H-pyrrolo[3,2,1-*ij*]quinoline-5-carboxylate (11o):** Methyl 2-(5-chloro-2-methyl-1*H*-indole-1-carbonyl)-3-(4-methoxyphenyl)acrylate (0.0100 g, 0.261 mmol), In(OTf)<sub>3</sub> (0.0220 g, 0.0391 mmol) and toluene (5 mL) were combined according to the general procedure to afford **11o** as a white solid (0.0900 g, 90%) after 4 h. (*R<sub>f</sub>* 0.45, 20% EtOAc/Hex) [m.p. 132-134 °C] (Single Diastereomer observed) <sup>1</sup>H NMR (300 MHz, CDCl<sub>3</sub>) δ ppm 7.29 - 7.33 (m, 1H), 7.11 - 7.18 (m, 2H), 6.85 - 6.93 (m, 2H), 6.68 (d, *J* = 1.10 Hz, 1H), 6.35 (d, *J* = 1.14 Hz, 1H), 4.91 (d, *J* = 10.74 Hz, 1H), 4.16 (d, *J* = 10.77 Hz, 1H), 3.81 (s, 3H), 3.67 (s, 3H), 2.69 (s, 3H). <sup>13</sup>C NMR (75 MHz, CDCl<sub>3</sub>) δ ppm 168.6, 163.7, 159.2, 138.5, 133.2, 130.1, 129.7, 129.5, 128.4, 123.9, 121.1, 118.3, 114.4, 108.6, 58.5, 55.2, 52.7, 45.2, 15.2. IR 2954.9 (w), 2838.0 (w), 1747.7 (s), 1710.5 (s), 1611.3 (m), 1513.0 (s), 1462.4 (m), 1427.7 (m), 1371.8 (s), 1251.1 (s), 1210.2 (m), 1178.1 (m), 1152.2 (s), 1031.1 (m), 886.2 (m), 858.6 (m), 829.4 (m), 763.7 (w), 737.9 (s), 701.6 (m) cm<sup>-1</sup>. HRMS (ESI) *M/Z*+ Calc. 383.0924, Obs. 383.0923.



### 3. Control Reactions

#### **TfOH Control Reaction:**

To a mixture of TfOH (0.0010 g, 0.0068 mmol) in 1,2-DCE heated to a reflux, dissolved (*Z*)-Methyl 2-(2-methyl-1*H*-indole-1-carbonyl)-3-(4-nitrophenyl)acrylate (0.250 g, 0.6866 mmol) was syringed into the reaction vessel. The reaction mixture was stirred at reflux for 16 h. The reaction afforded only starting material as observed by crude <sup>1</sup>H NMR.

#### **DBU Epimerization Reaction:**

The diastereomeric mixture of Methyl 2-methyl-6-(4-nitrophenyl)-4-oxo-5,6-dihydro-4*H*-pyrrolo[3,2,1-*ij*]quinoline-5-carboxylate (0.06 g, 0.16478 mmol), DBU (0.0075 g, 0.0494 mmol) and 1,2-DCE (3 mL) were combined and stirred at room temperature for 14 h. The reaction afforded *trans* as a single observable diastereomer (>99:1 *dr*) from <sup>1</sup>H NMR of the crude reaction mixture.

### 4. References

1. Patil, D. V.; Cavitt, M. A.; Grzybowski, P. L.; France, S. *Chem. Commun.* **2011**, 47, 10278.
2. Frontier, A. J.; Vaidya, T.; Atesin, A. C.; Herrick, I. R.; Eisenberg, R. *Angew. Chem. Int. Ed.* **2010**, 49, 3363.
3. Aggarwal, V. K.; Beffield, A. J. *Org. Lett.* **2003**, 5, 5075.

### 5. NMR Spectra (<sup>1</sup>H and <sup>13</sup>C)

Std Proton parameters  
Sample: NB-5-DWP-123-A-H  
File: xp  
Pulse Sequence: s2pu1  
Solvent: cdcl3  
Ambient temperature  
Operator: dpat11  
Mercury-300 v1202w  
Relax. delay 1.000 sec  
Pulse 30.0 degrees  
Acq. time 3.550 sec  
Width 4803.1 Hz  
16 repetitions  
OSSERVE H1: 300.2184960 MHz  
DATA PROCESSING  
File size 65536  
Total time 1 min, 16 sec

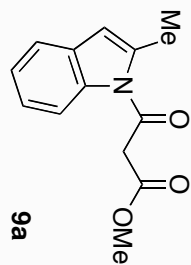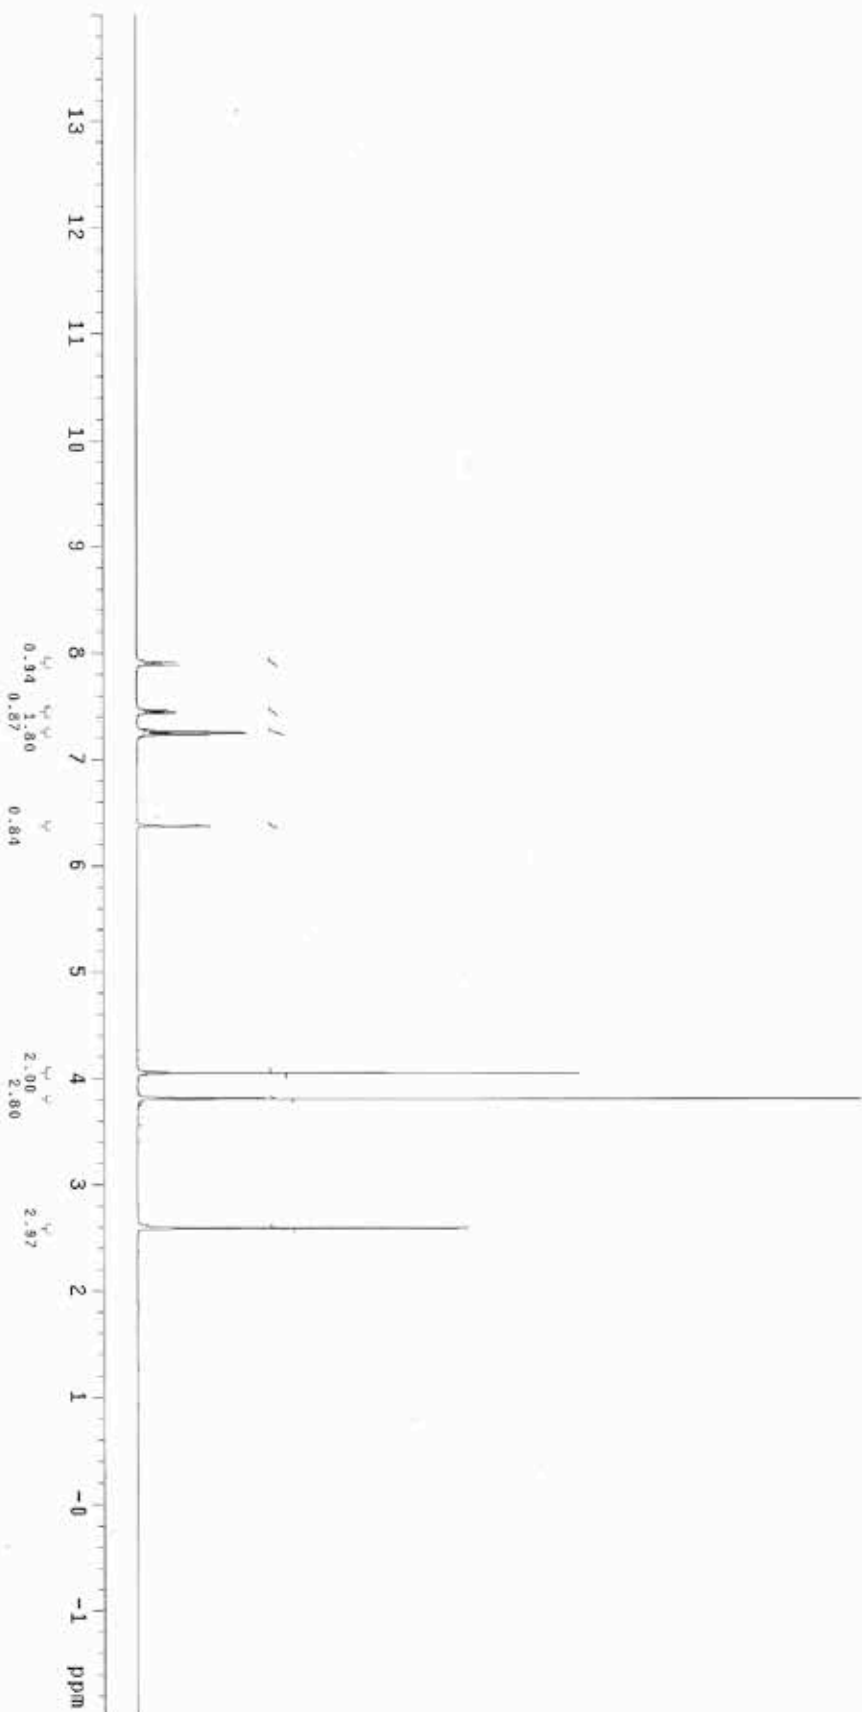

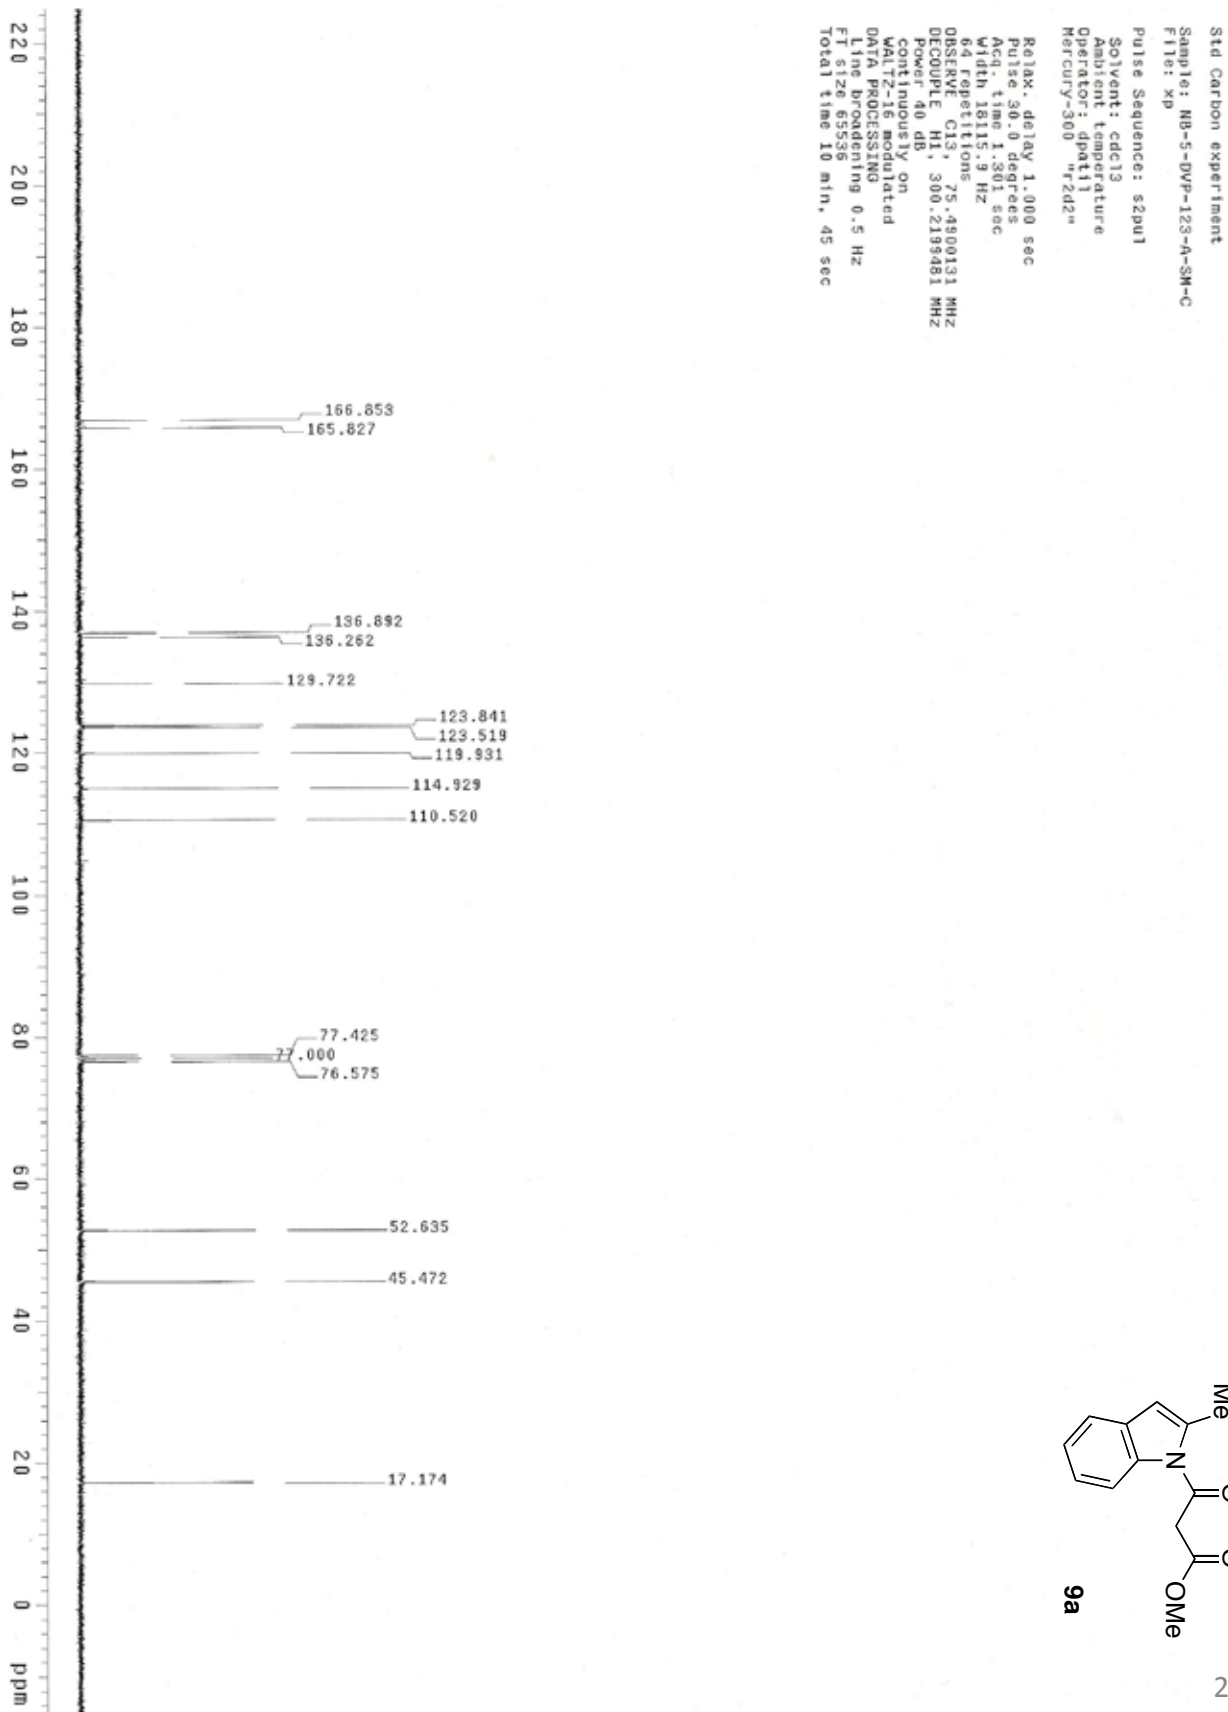

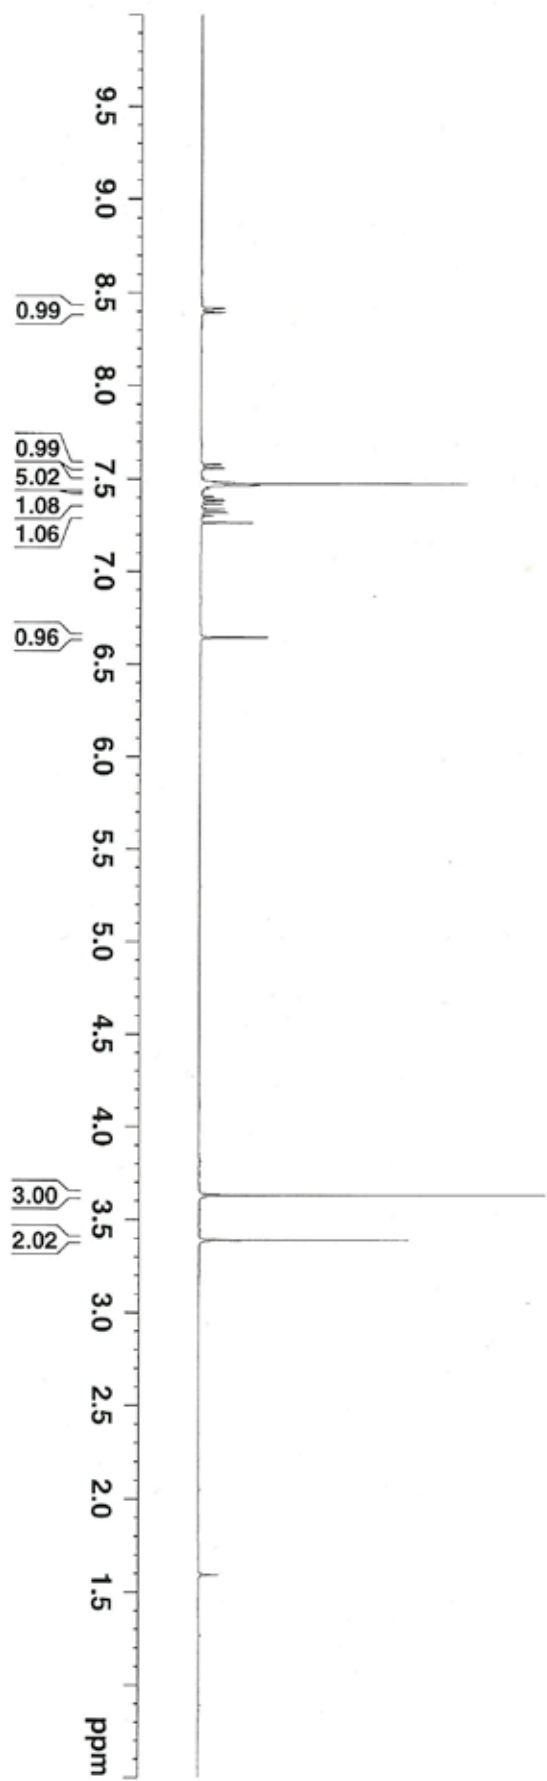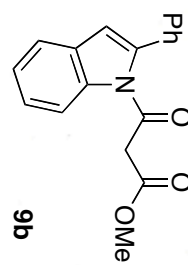



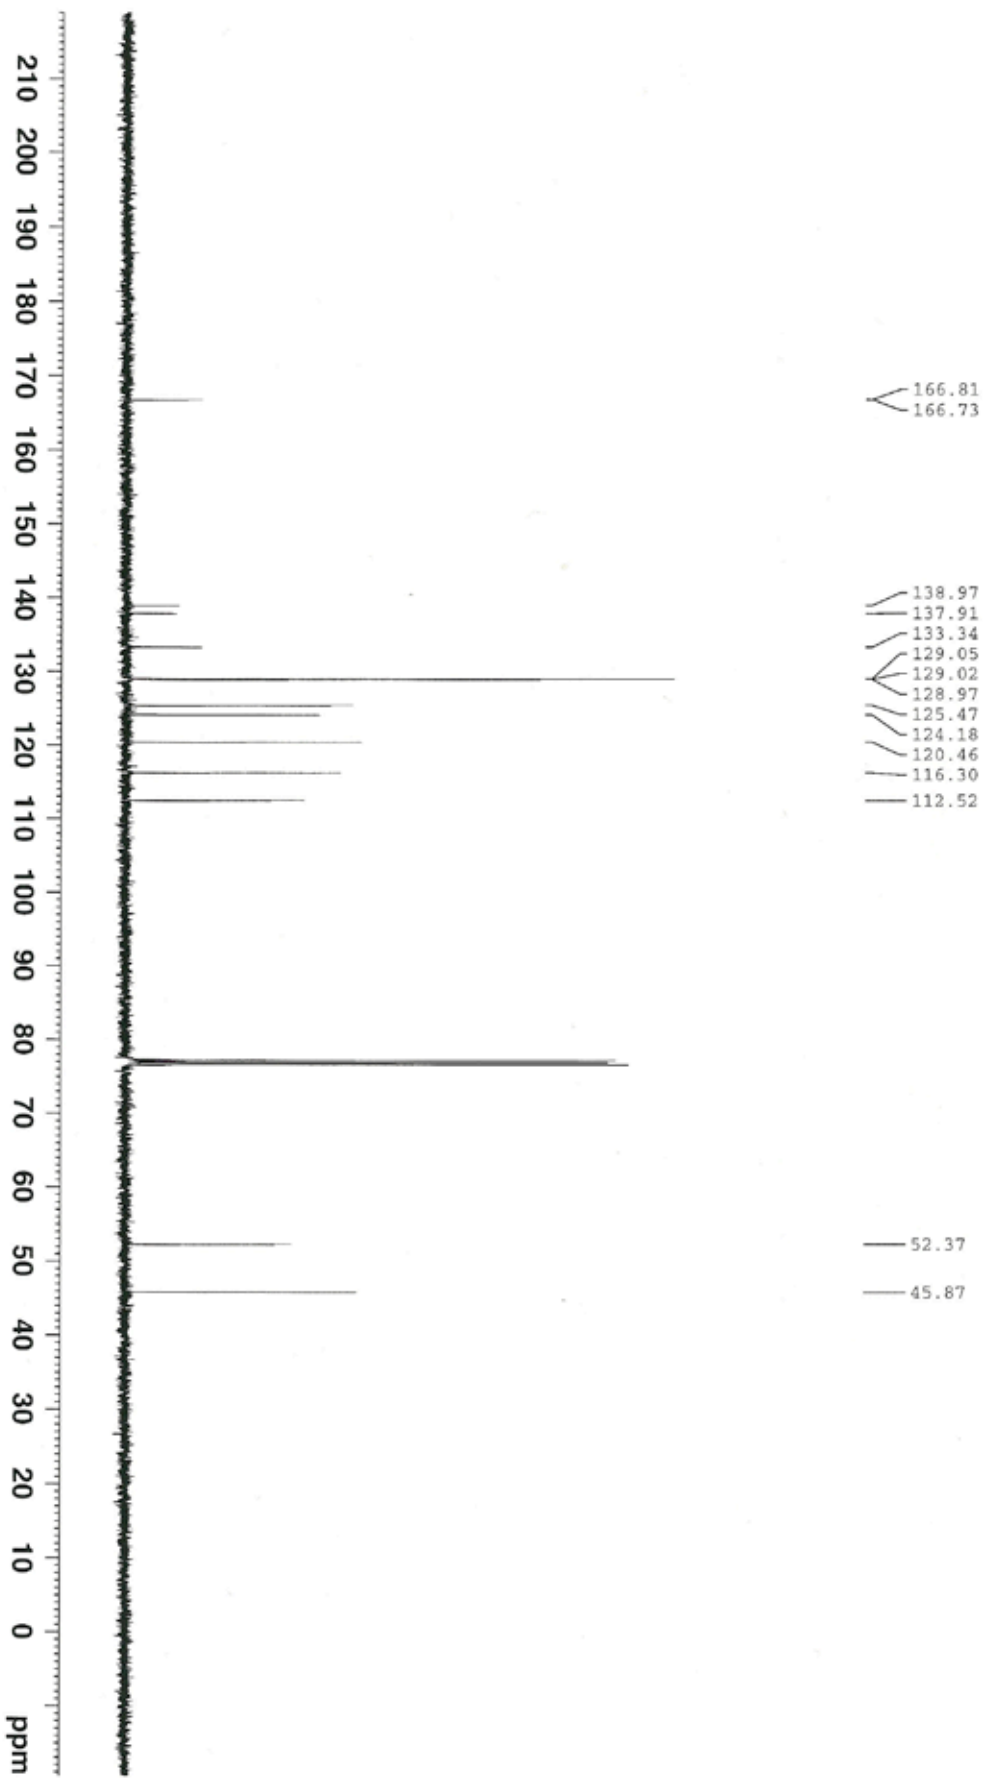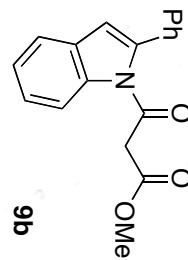

Std Proton parameters  
Sample: NB-5-DVP-28-H  
File: xp  
Pulse Sequence: s2pu1  
Solvent: cdcl3  
Ambient temperature  
Operator: dpat11  
Mercury-300 "r2d2"  
Relax. delay 1.000 sec  
Pulse 30.0 degrees  
Acq. time 3.550 sec  
Width 4803.1 Hz  
18 repetitions  
ORSERVE HI, 300.2237154 MHz  
DATA PROCESSING  
F1 size 65936  
Total time 1 min, 16 sec

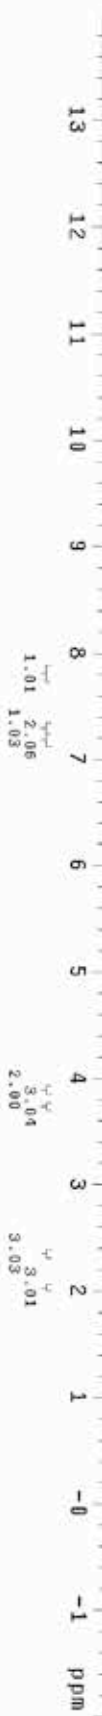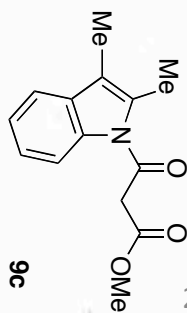

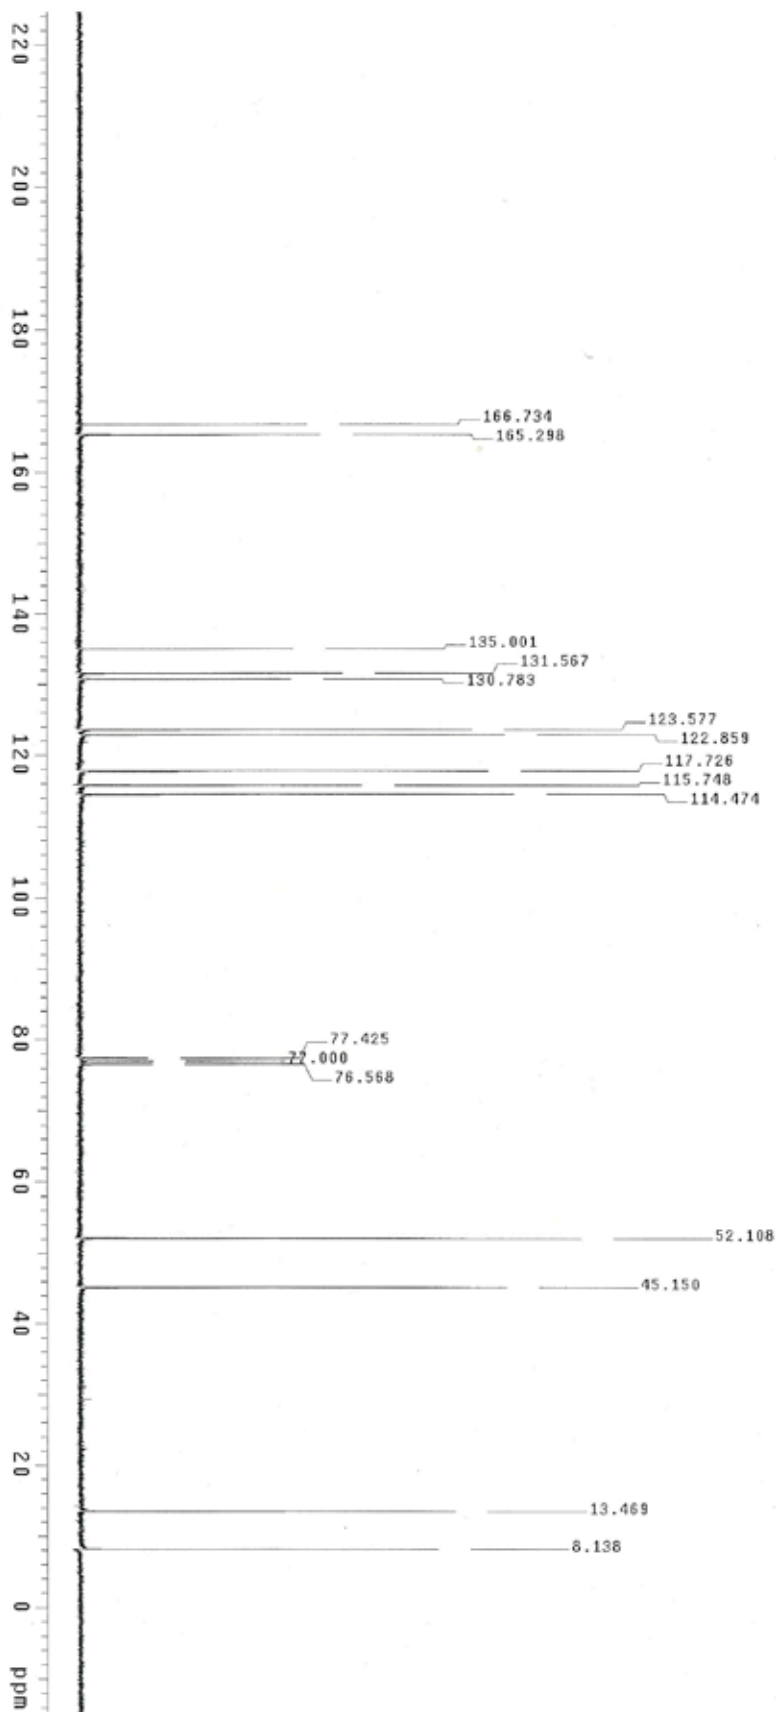

Std Carbon experiment  
Sample: NB-5-DVP-28-H  
File: xp  
Pulse Sequence: s2pu1  
Solvent: cdcl3  
Acq. time: 1.301 sec  
Width: 18115.9 Hz  
80 repetitions: 75.4819452 MHz  
OBSERVE: C13, 300.2251667 MHz  
DECOUPLE: H1, 300.2251667 MHz  
Power: 40 dB  
continuously on  
WALTZ-16 modulated  
DATA PROCESSING  
Line broadening: 0.5 Hz  
F1 size: 65536  
Total time: 10 min, 45 sec

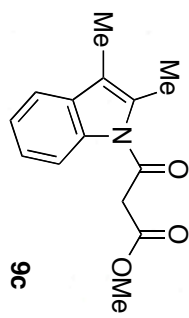

Sample: N8-5-DVP-185-8-H  
File: xp  
Pulse Sequence: zgpg30  
Solvent: CDCl3  
Ambient Temperature  
Operator: opad11  
Mercury-300 "r202"  
Relax. delay 1.000 sec  
Pulse 30.0 degrees  
Acq. time 3.550 sec  
Width 4803.1 Hz  
38 repetitions  
OBSERVE H1, 300.2185002 MHz  
DATA PROCESSING  
FT size 65536  
Total time 9 min, 31 sec

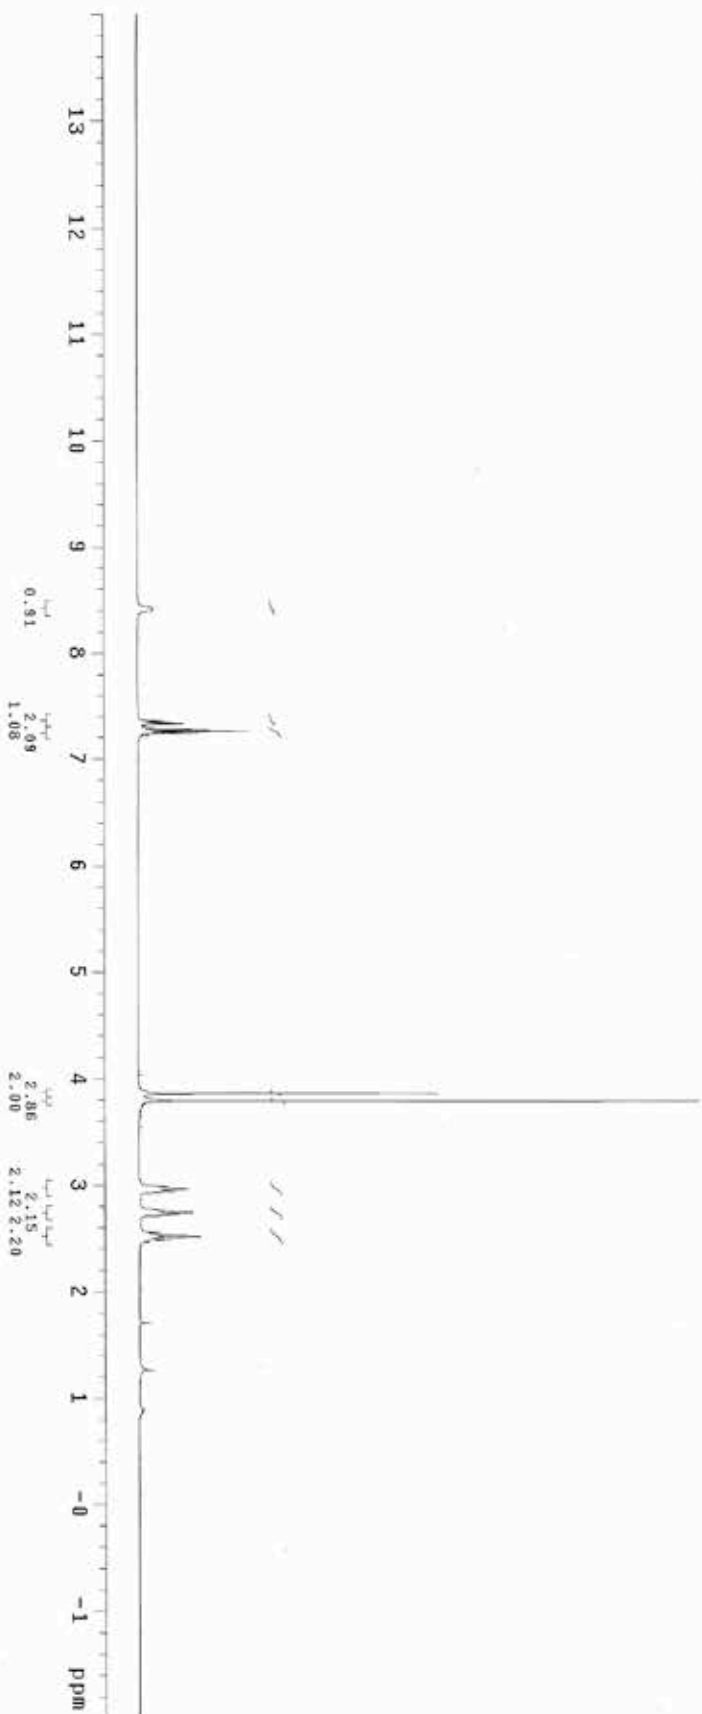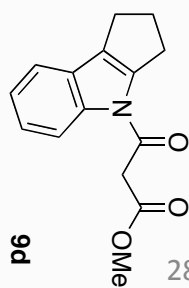

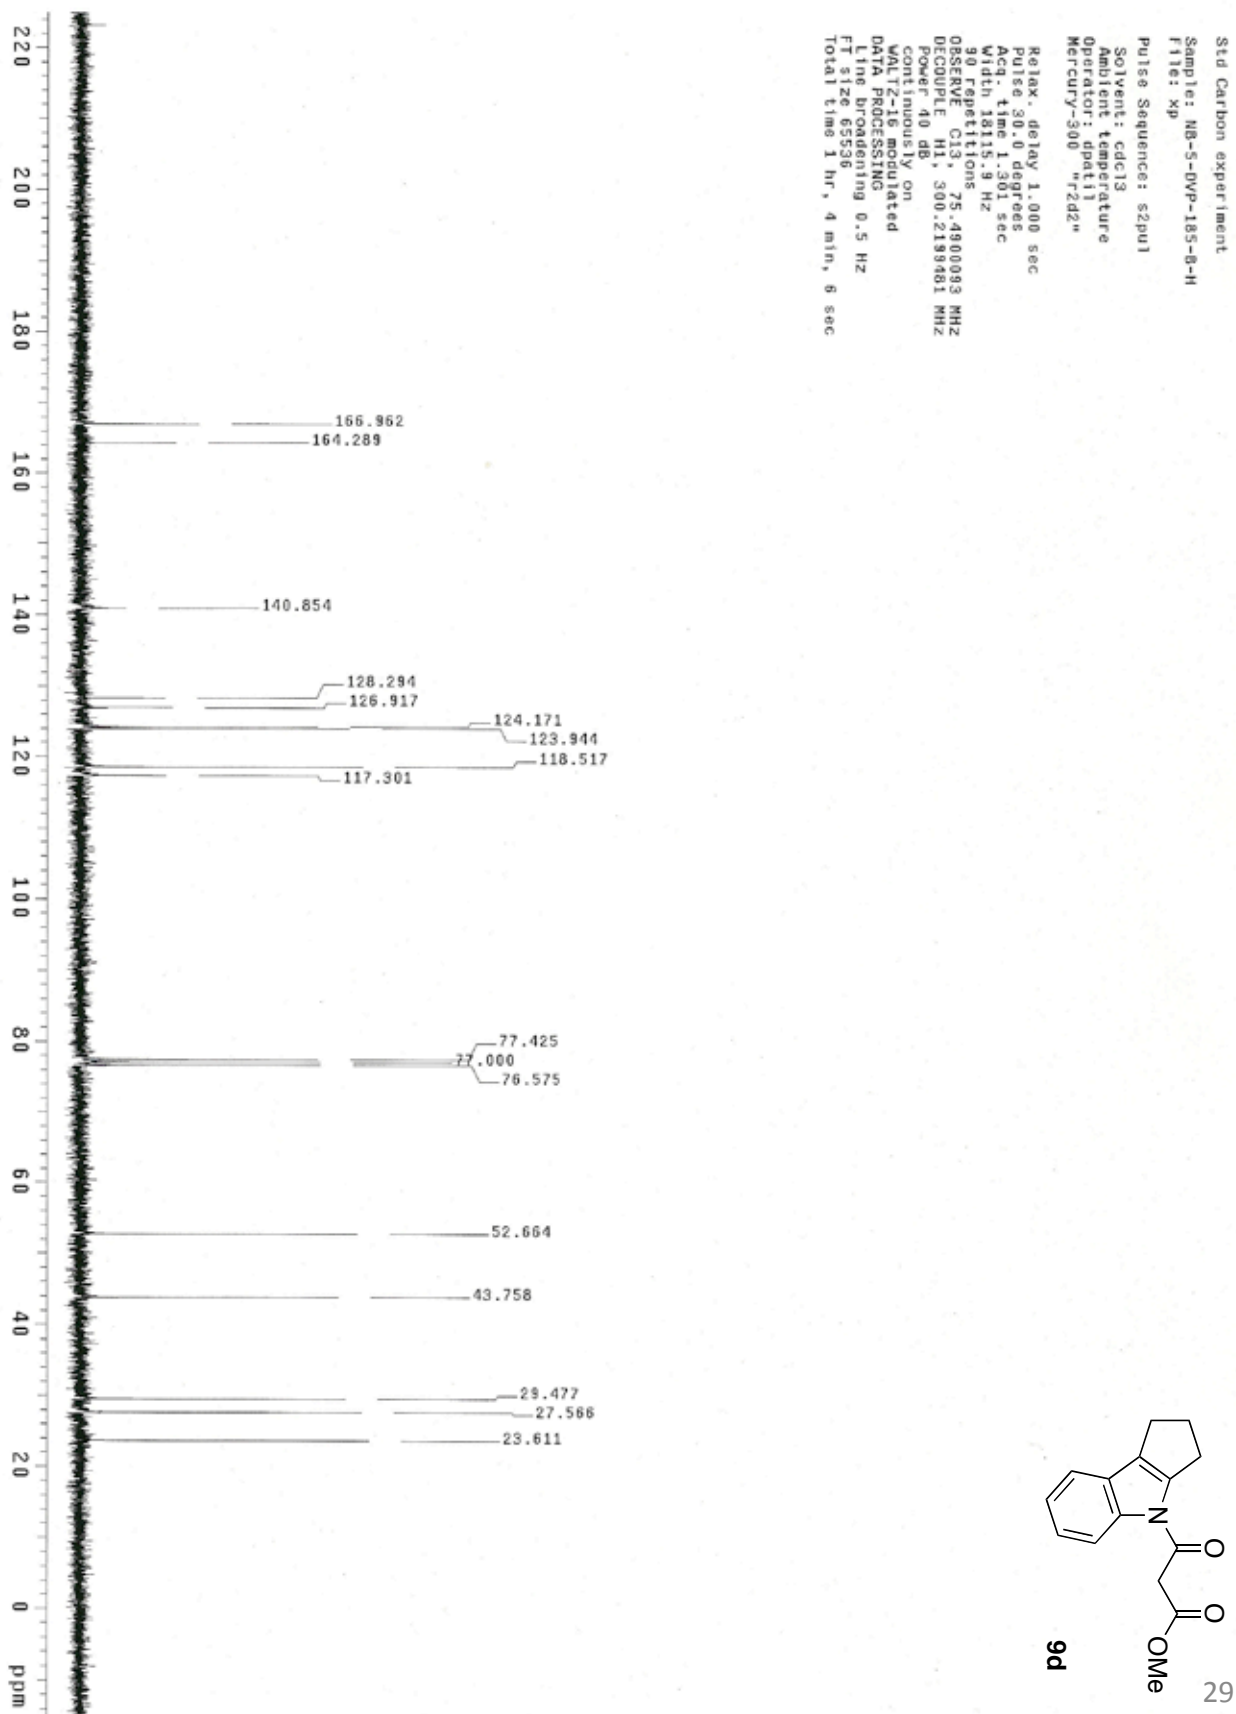

Std Proton parameters  
Sample: NB-5-DVP-12E-A-H  
F11er: xp  
Pulse Sequence: s2pu1  
Solvent: cdcl3  
Ambient temperature  
Operator: dpat11  
Mercury-300 "r2d2"  
Relax. delay: 1.000 sec  
Pulse: 30.0 degrees  
Acq. time: 3.550 sec  
Width: 4803.1 Hz  
16 repetitions  
OBSERVE: H1, 300.2185062 MHz  
DATA PROCESSING  
F1 size: 65536  
Total time: 1 min., 16 sec

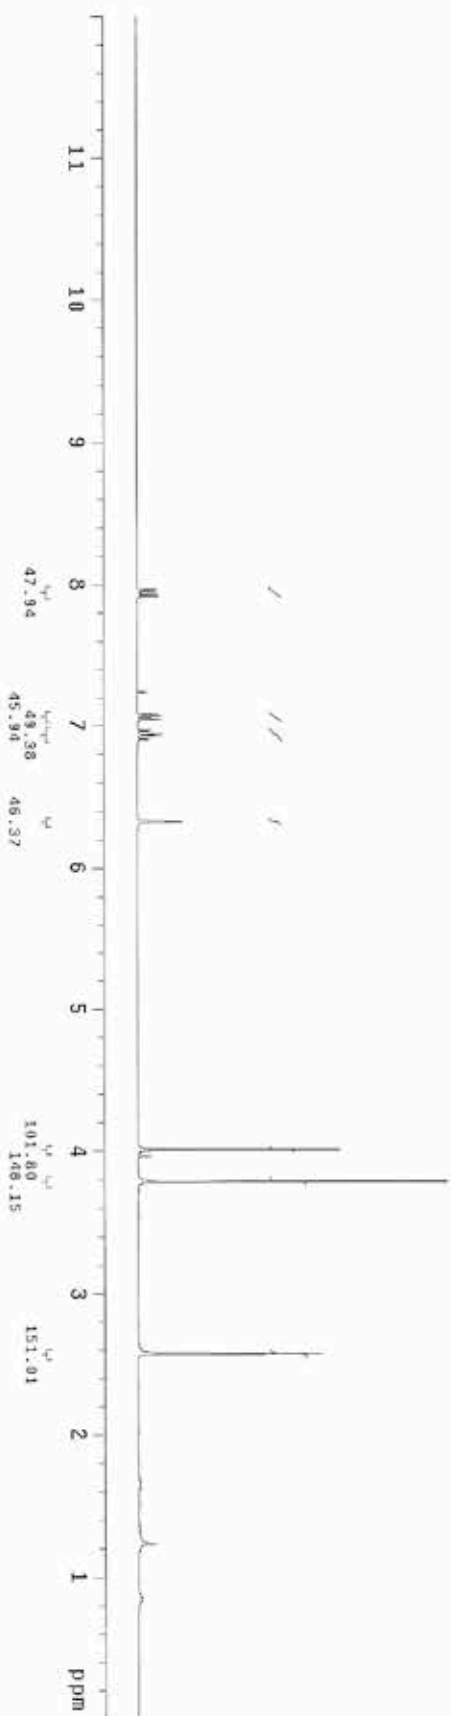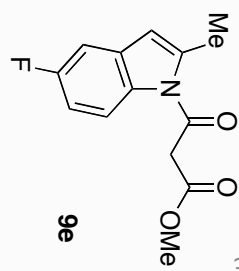

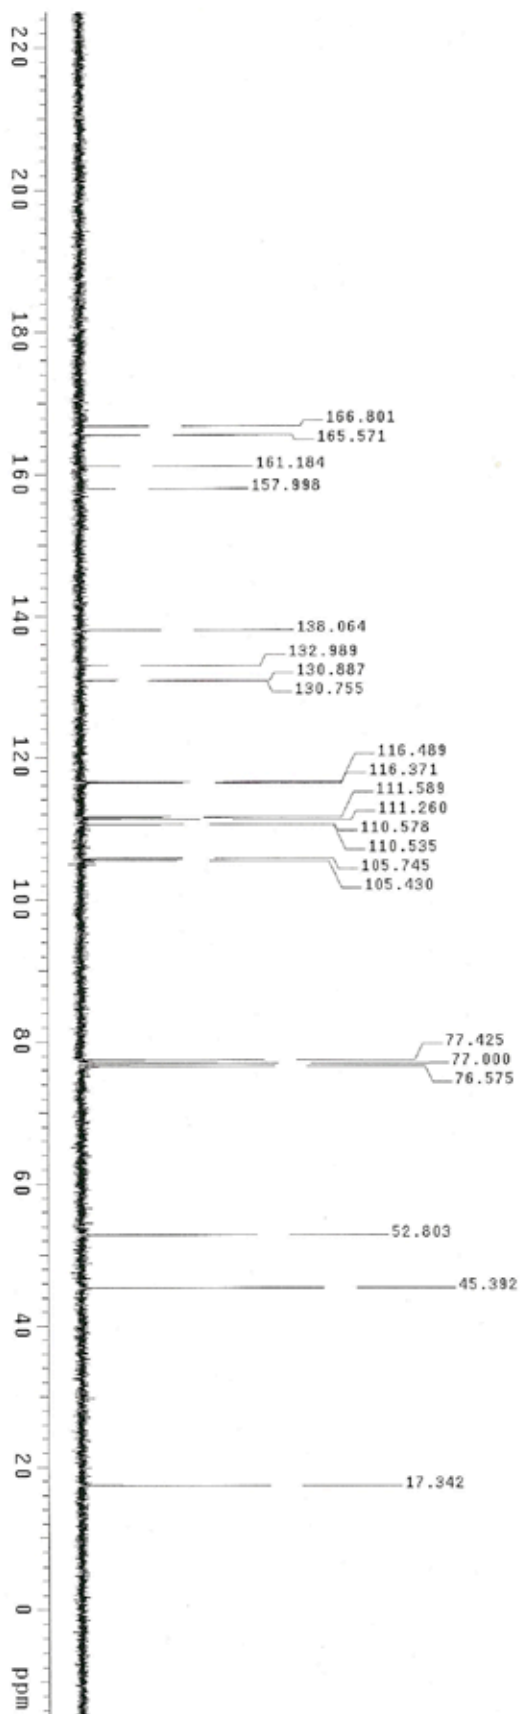

Std Carbon experiment  
Sample: N6-5-DVP-126-A-C  
File: xp  
Pulse Sequence: s2pu1  
Solvent: cdcl3  
Ambient temperature  
Operator: dpall  
Mercury-300 "r2d2"  
Relax. delay 1.000 sec  
Pulse 30.0 degrees  
Acq. time 1.301 sec  
Width 1815.9 Hz  
144 repetitions  
OBSERVE C13, 75.490054 MHz  
DECOUPLE H1, 300.219481 MHz  
Power 40 dB  
continuously on  
WALTZ-16 modulated  
DATA PROCESSING  
Line broadening 0.5 Hz  
FT size 65536  
Total time 10 min, 45 sec

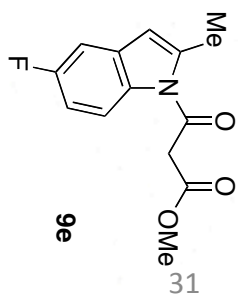

Std Proton parameters  
Sample: NB-5-DVP-165-A-H  
File: xp  
Pulse Sequence: s2pu1  
Solvent: cdcl3  
Pulsed: temperature  
Operator: dmf1  
Mercury-300 "1202"  
Relax. delay 1.000 sec  
Pulse 30.0 degrees  
Acq. time 3.550 sec  
Width 4803.1 Hz  
18 repetitions  
OBSERVE H1, 300.2185288 MHz  
DATA PROCESSING  
F1 size 65536  
Total time 15 hr, 51 min, 3 sec

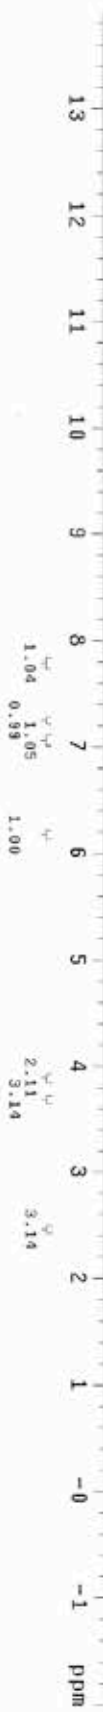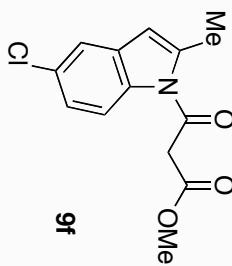



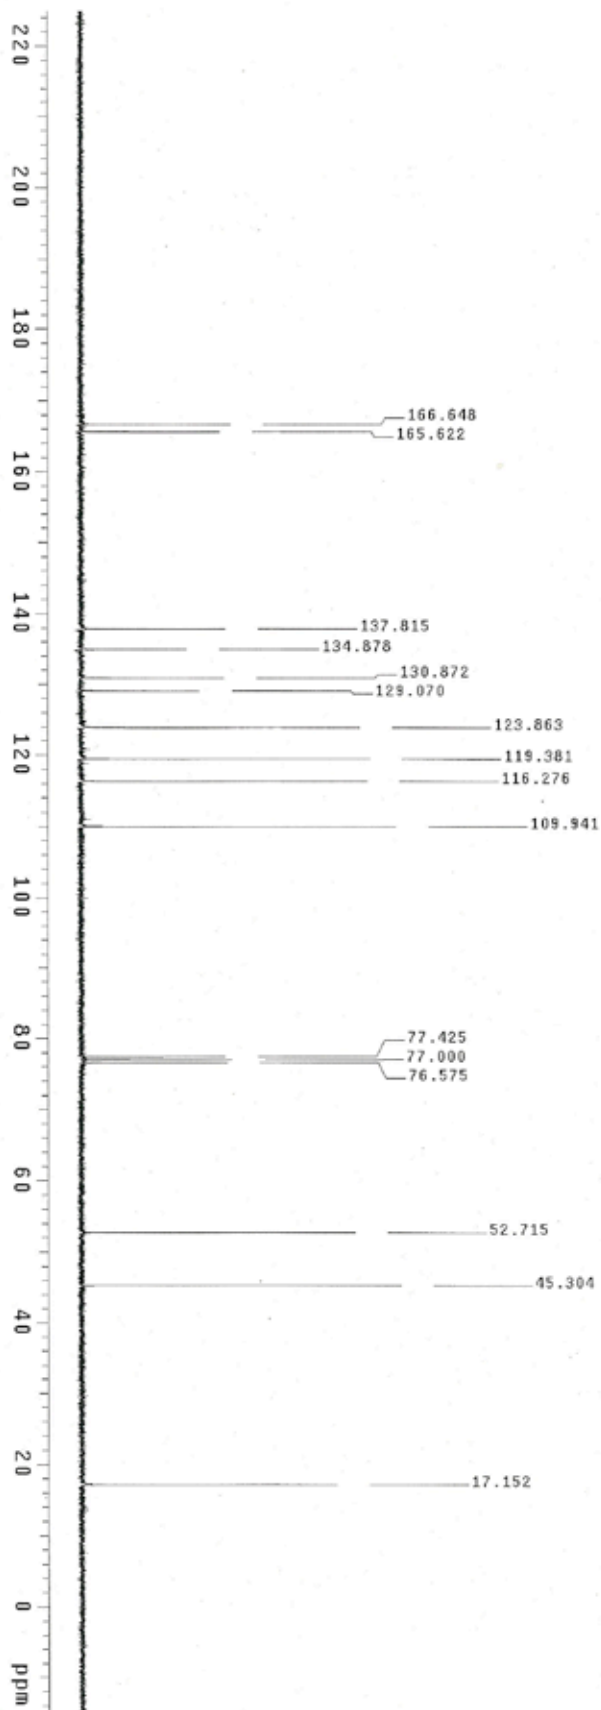

Std Carbon experiment  
Sample: NB-5-DVP-165-A-H  
File: xp  
Pulse Sequence: s2pu1  
Solvent: cdcl3  
Ambient temperature  
Operator: dmf11  
Mercury-300 "r2d2"  
Relax. delay 1.000 sec  
Pulse 30.0 degrees  
Acq. time 1.301 sec  
Width 18115.9 Hz  
200 repetitions  
OBSERVE C13, 75.4800109 MHz  
DECUPLE H1, 300.2199481 MHz  
Power 40 dB  
continuously on  
WALTZ-16 modulated  
DATA PROCESSING  
Line broadening 0.5 Hz  
F1 size 65936  
Total time 10 hr, 41 min, 3 sec

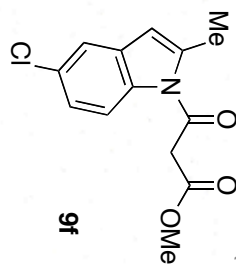

II-MAC-39-H-T2  
Rf = 0.24 (20% EtOAc/Hex)  
Sample: II-MAC-39-H-T2  
File: home/france/cavitt/II-MAC-39-H-T2.fid  
Pulse Sequence: s2pul1  
Solvent: cdcl3  
Ambient temperature  
Operator: cavitt  
File: II-MAC-39-H-T2  
Mercury-300 "r2d2"  
Relax. delay 1.000 sec  
Pulse 30.0 degrees  
Acq. time 3.550 sec  
Width 4803.1 Hz  
23 repetitions  
OBSERVE NI: 300.2237111 MHz  
DATA PROCESSING  
F1 size 63538  
Total time 8 min, 34 sec

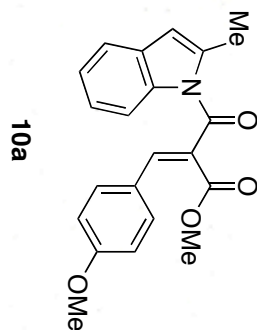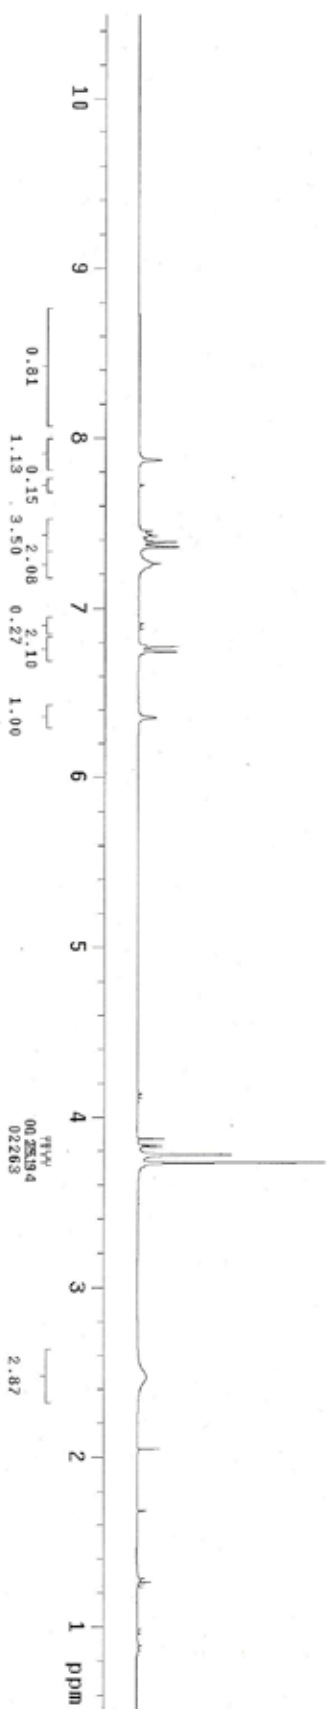

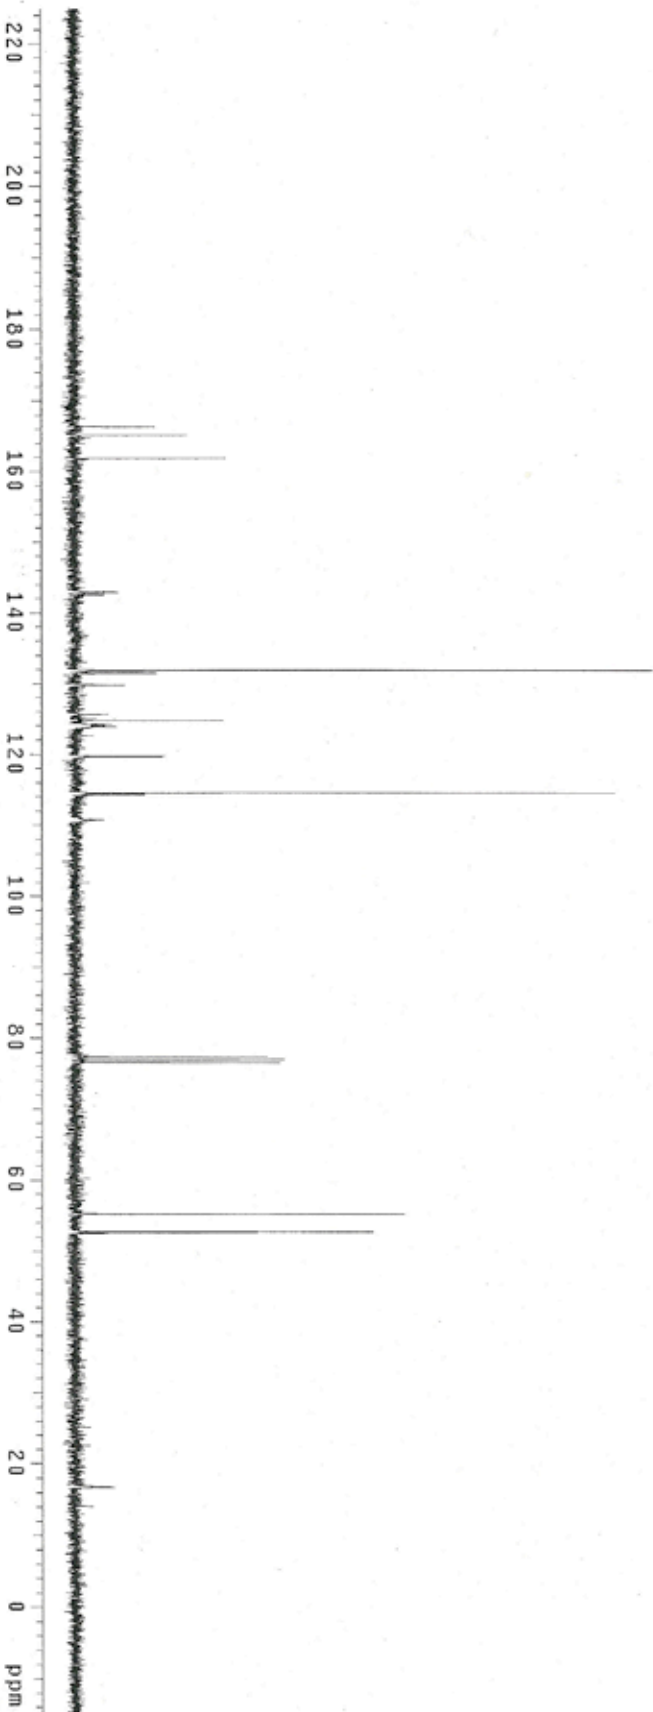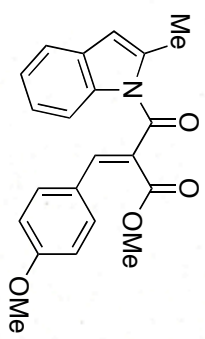

| INDEX | FREQUENCY | PPM     | HEIGHT |
|-------|-----------|---------|--------|
| 1     | 12556.6   | 166.331 | 12.0   |
| 2     | 12464.2   | 165.108 | 17.0   |
| 3     | 12215.4   | 161.613 | 22.8   |
| 4     | 10785.8   | 142.874 | 8.8    |
| 5     | 10758.7   | 142.515 | 4.4    |
| 6     | 9954.8    | 131.867 | 87.7   |
| 7     | 9922.8    | 131.442 | 12.3   |
| 8     | 9796.7    | 129.773 | 7.5    |
| 9     | 9480.5    | 125.584 | 5.0    |
| 10    | 9442.3    | 125.078 | 3.2    |
| 11    | 9418.9    | 124.741 | 22.3   |
| 12    | 9372.7    | 124.156 | 5.6    |
| 13    | 9350.6    | 123.869 | 6.3    |
| 14    | 9031.6    | 119.637 | 13.5   |
| 15    | 8645.1    | 114.518 | 81.9   |
| 16    | 8528.9    | 114.276 | 10.5   |
| 17    | 8354.3    | 110.732 | 4.4    |
| 18    | 5844.9    | 77.425  | 28.9   |
| 19    | 5812.8    | 77.000  | 31.5   |
| 20    | 5760.8    | 76.575  | 30.6   |
| 21    | 4170.9    | 55.250  | 8.8    |
| 22    | 4167.0    | 55.196  | 49.7   |
| 23    | 3975.7    | 52.664  | 45.0   |
| 24    | 3968.0    | 52.562  | 4.9    |
| 25    | 3958.0    | 52.490  | 4.3    |
| 26    | 1263.9    | 16.743  | 5.9    |

11-MAC-38-C  
 Rf = 0.24 (EtOAc/Hex)  
 File: xp  
 Pulse Sequence: szpu1  
 Solvent: CdCl3  
 Ambient Temperature  
 Operator: cavitti  
 Mercury-390 "r2d2"  
 Relax. delay 1.000 sec  
 Pulse 30.0 degrees  
 Acq. time 1.301 sec  
 100h 1411.3 Hz  
 810h 1411.3 Hz  
 08SERVE C13 75.4913225 MHz  
 DECOUPLE H1 300.2251667 MHz  
 Power 40 dB  
 Continuously on  
 WALTZ-16 modulated  
 DATA PROCESSING  
 Line broadening 0.5 Hz  
 F1 size 65536  
 Total time 8 hr, 34 min, 48 sec

2-OMe at 70C  
Marchello

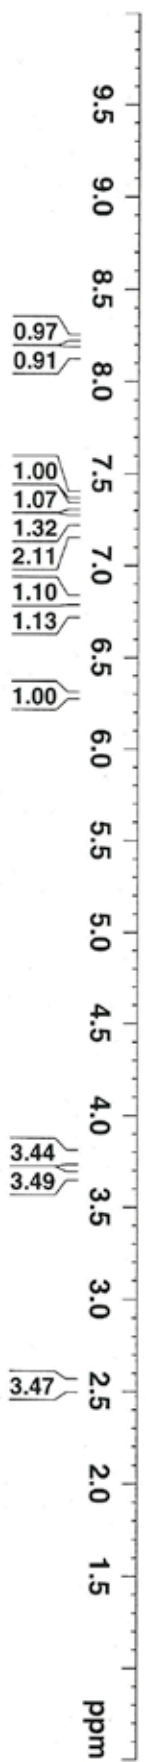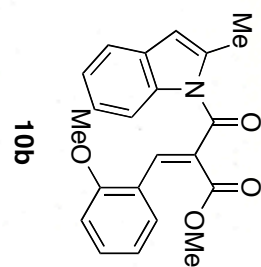

2-OMe at 70C  
Marchello

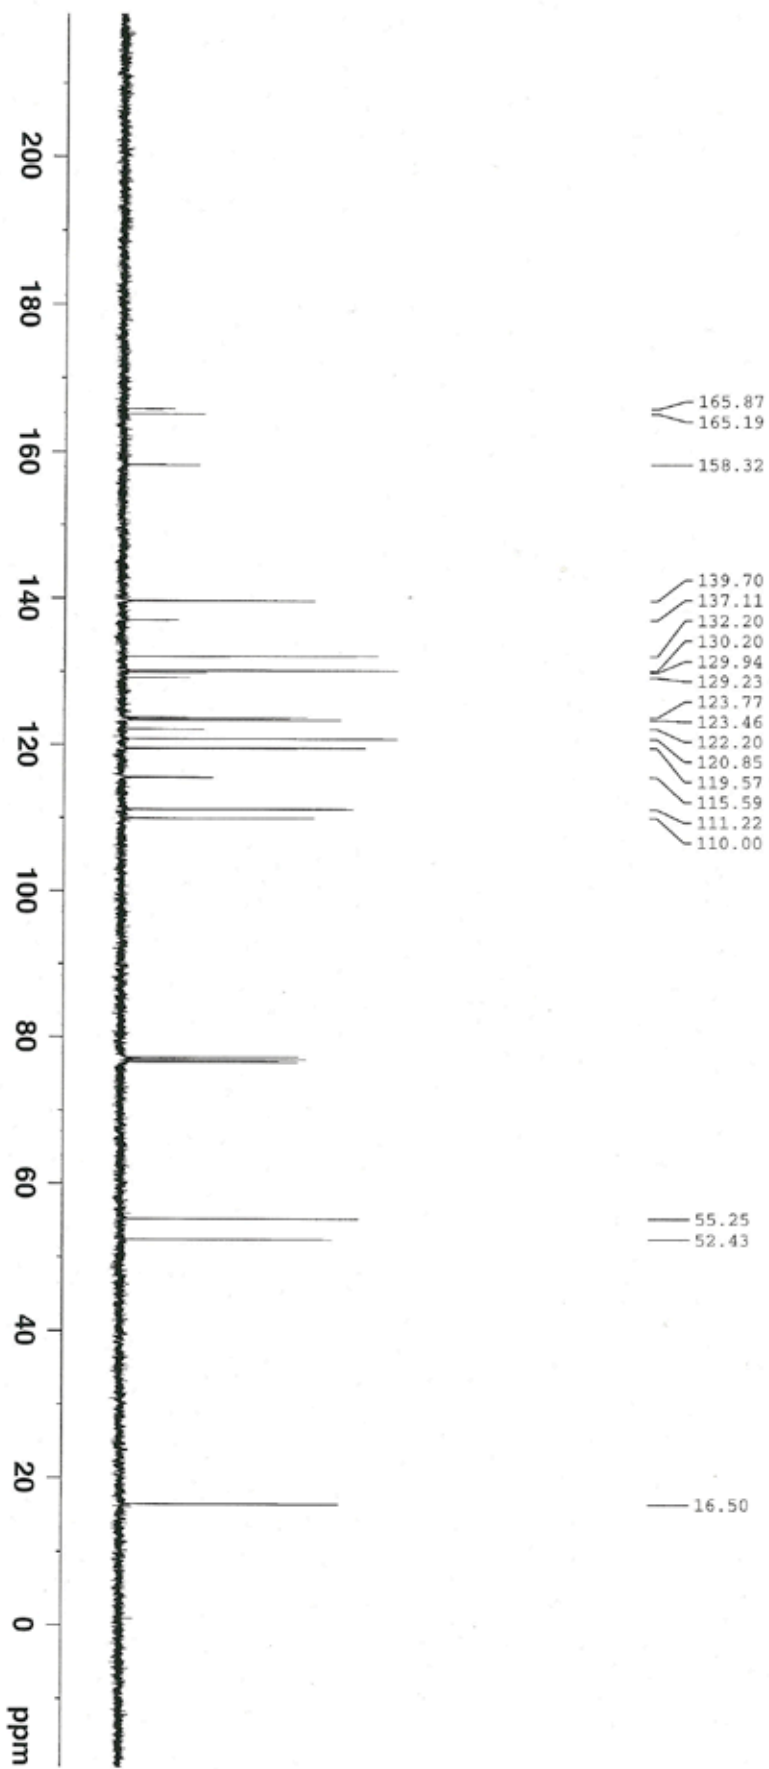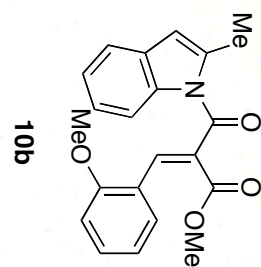

4-NO<sub>2</sub> at 70C  
Marchello

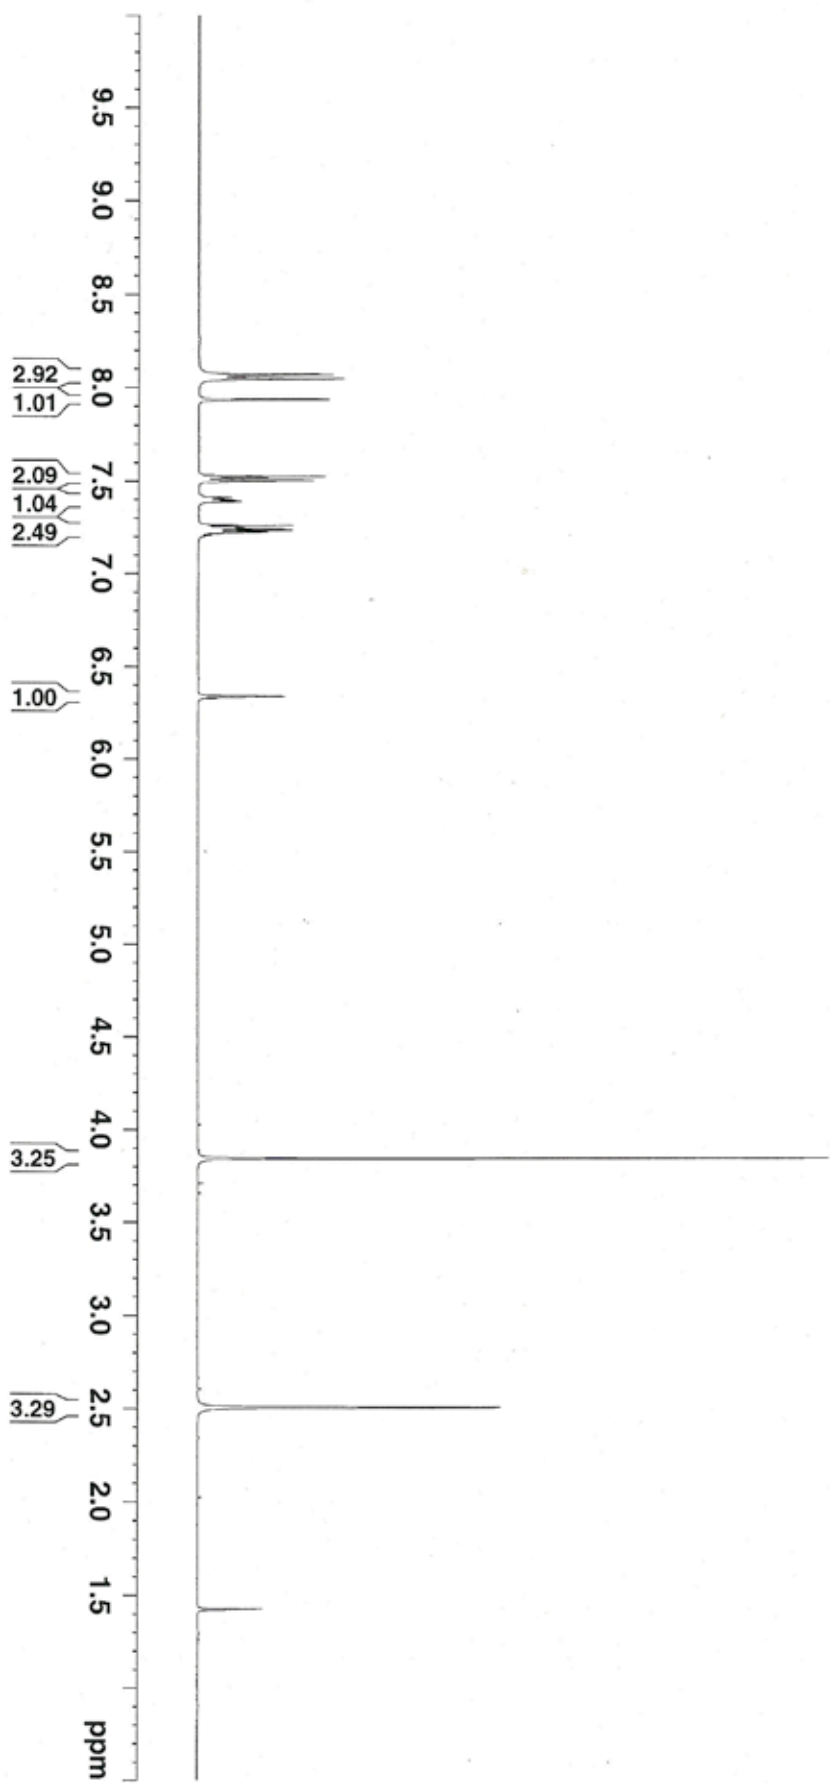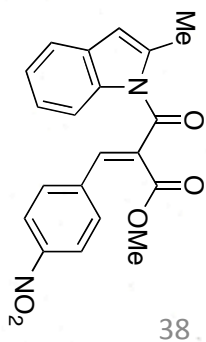

10c

4-NO<sub>2</sub> at 70C  
Marchello

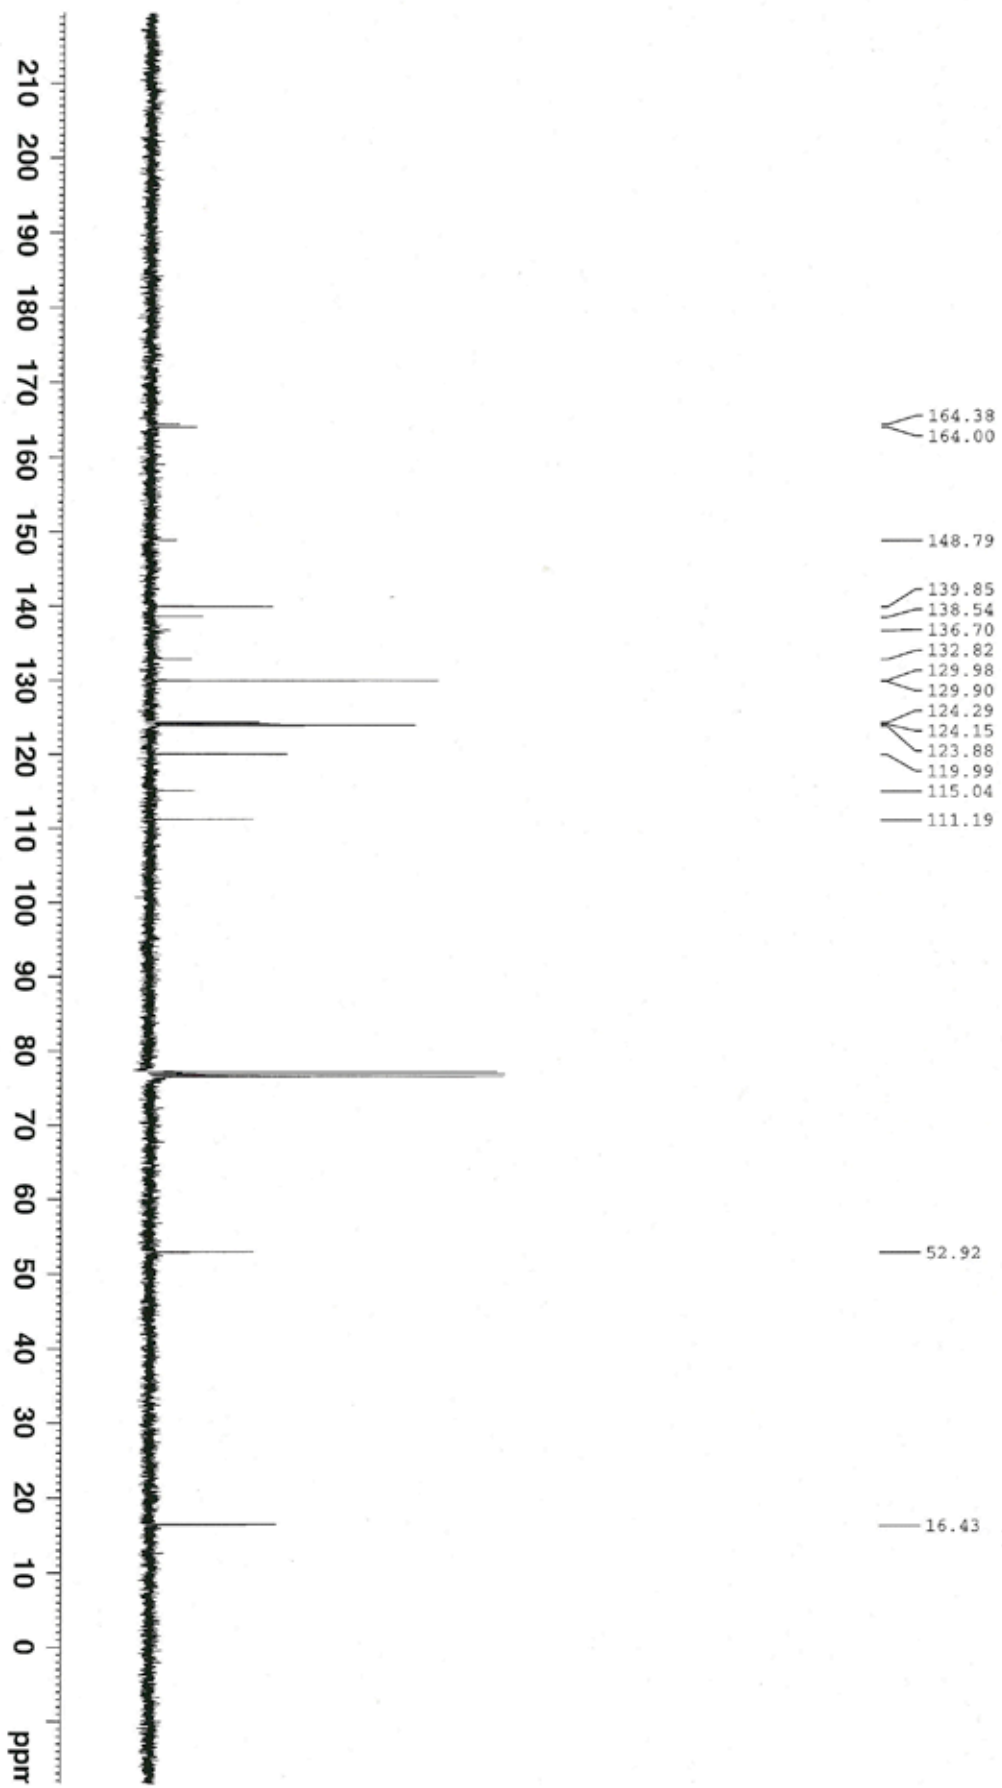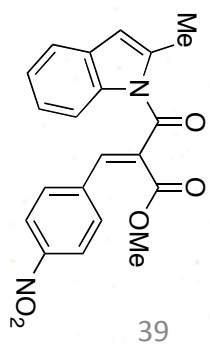

NB-5-DVP-207-B-H  
Marchello 60 C

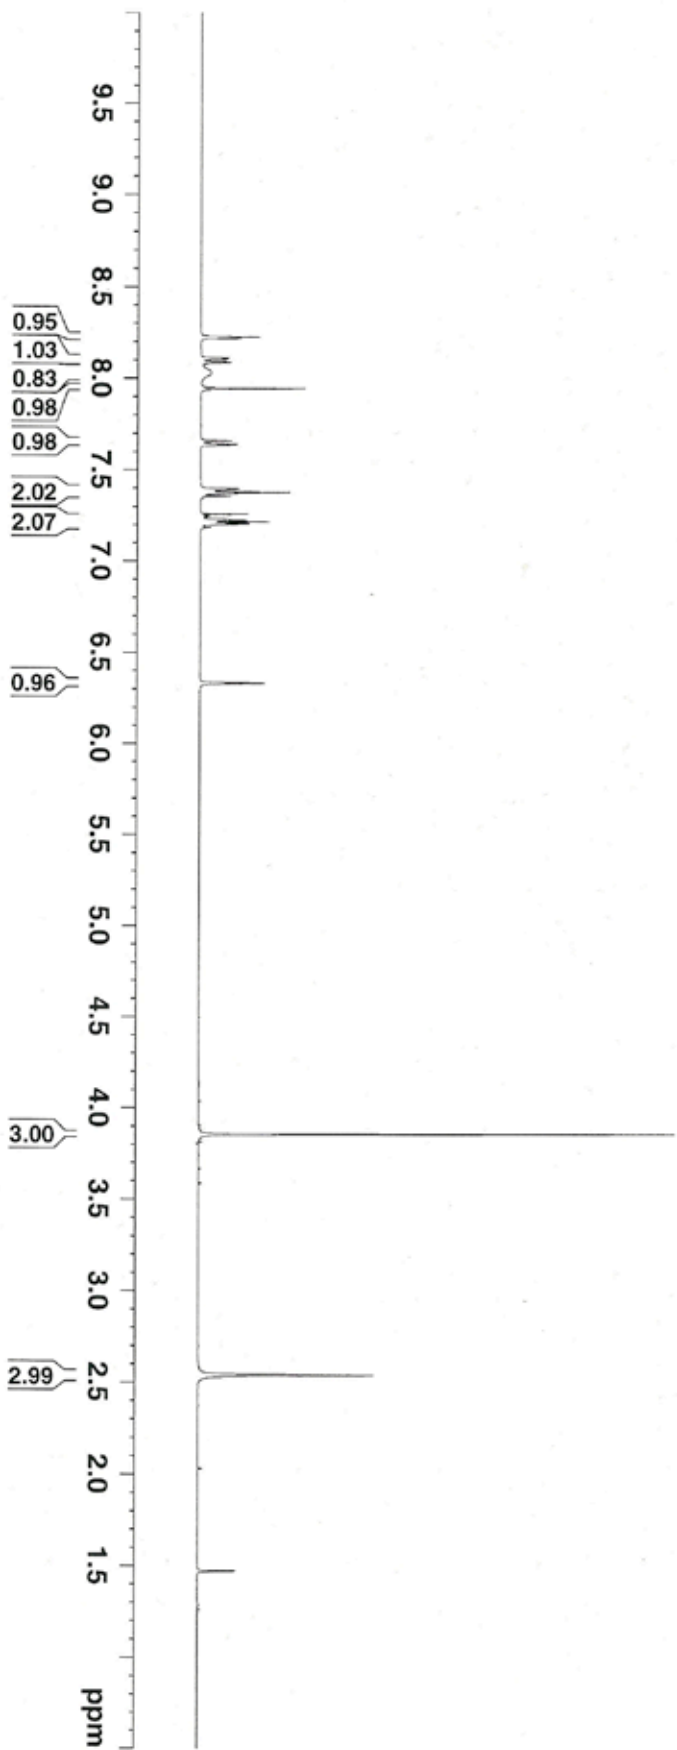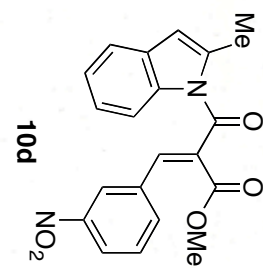



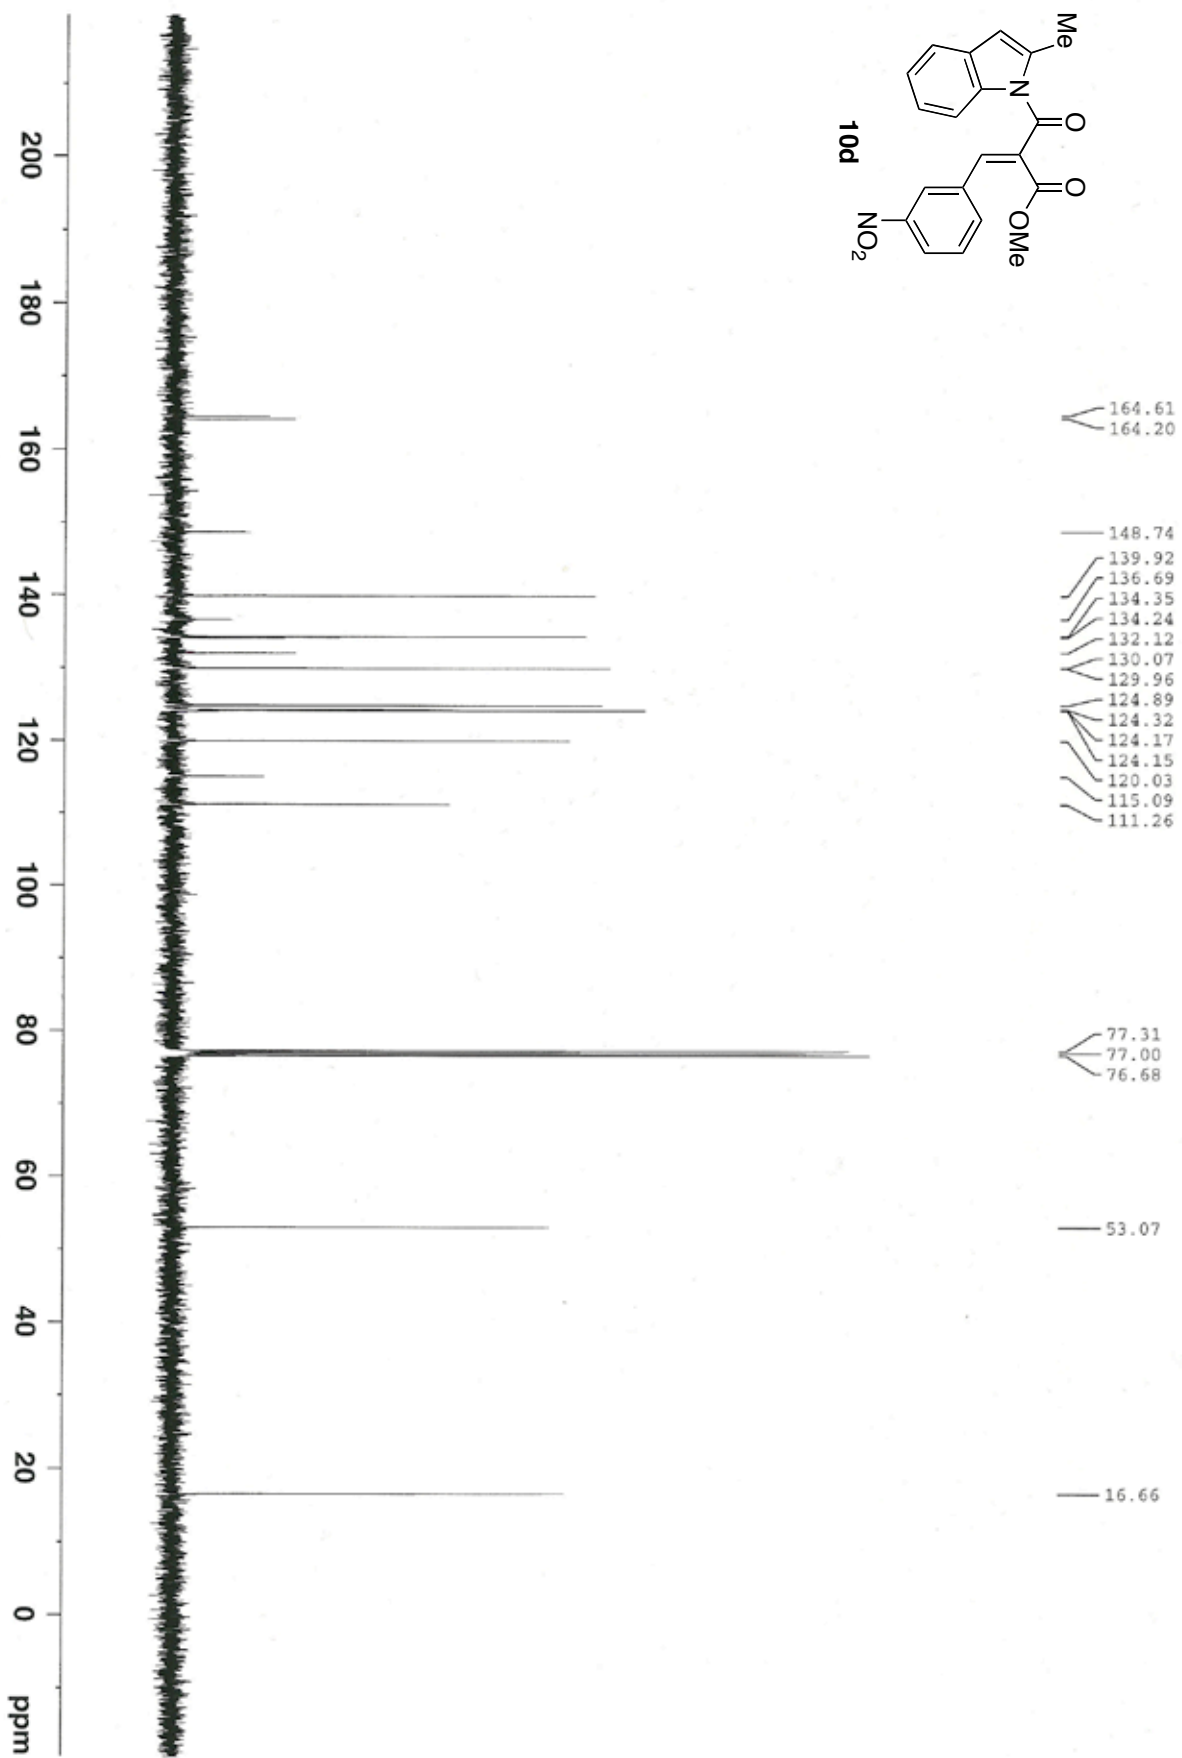

Std Proton parameters  
Sample: NB-5-DVP-207-A-H  
File: home/france/dpatt1/NB-5-DVP-207-A-H.fid  
Pulse Sequence: s2pul1  
Solvent: cdc13  
Ambient temperature  
Operator: dpatt1  
File: NB-5-DVP-207-A-H  
Mercury-300 - r202  
Relax. delay 1.000 sec  
Pulse 30.0 degrees  
Acq. time 9.550 sec  
Width 4803.1 Hz  
22 repetitions  
OBSERVE H1, 300.2184986 MHz  
DATA PROCESSING  
File size 65536  
Total time 15 hr, 51 min, 9 sec

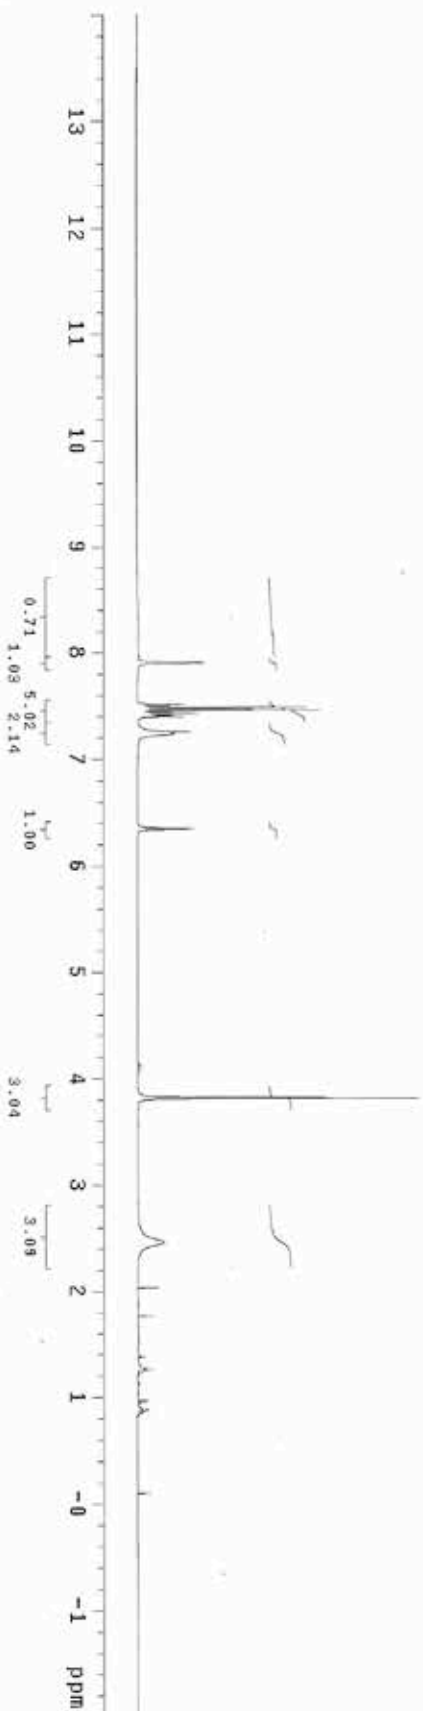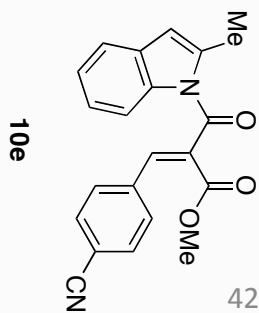

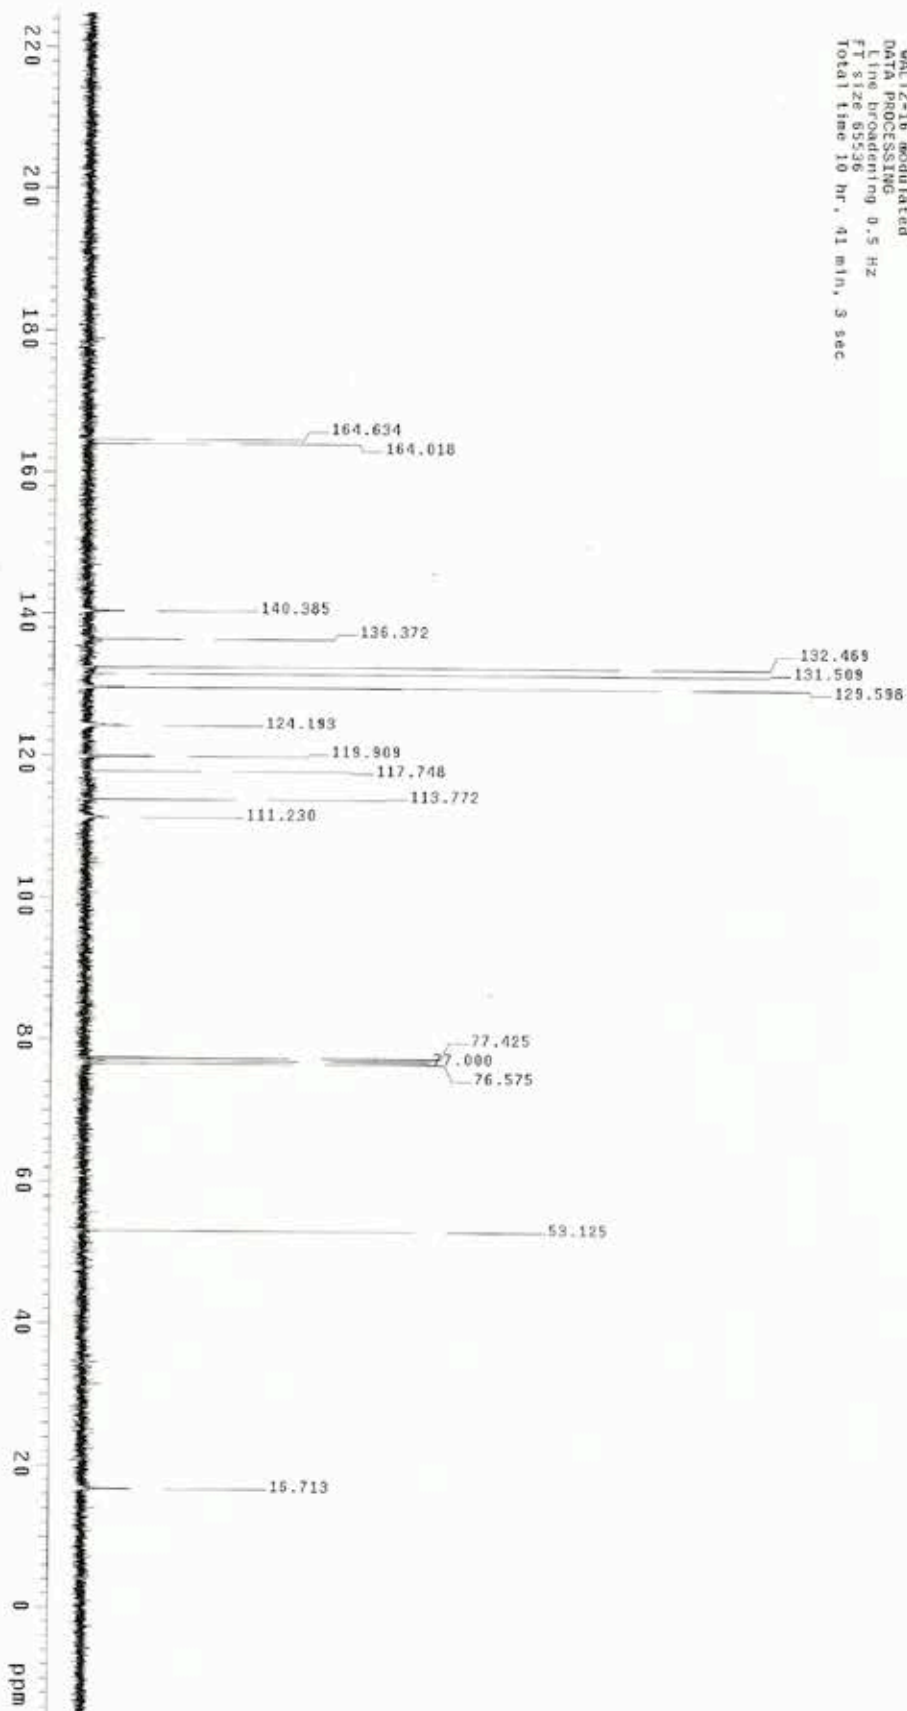

SI4 Carbon experiment  
Sample: NB-5-DVP-207-A-H  
File: Xp  
Pulse Sequence: zgpg30  
Solvent: cdcl3  
Ambient temperature  
Operator: dpat11  
Mercury-300 "F2d2"  
Relax. delay 1.000 sec  
Pulse 30.0 degrees  
Acq. time 1.301 sec  
Width 18115.9 Hz  
44 repetitions  
OBSERVE C13, 75.4900159 MHz  
DECUPLE H1, 300.2199481 MHz  
Power 40 dB  
continuity on  
MALTZ-16 modulated  
DATA PROCESSING  
Line broadening 0.5 Hz  
FT size 65536  
Total time 10 hr., 41 min., 3 sec.

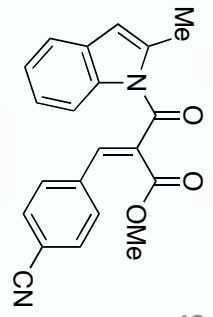

new nmf, green  
Sample: NB-5-DVP-128-HHH  
File: xp  
Pulse Sequence: s2pu1  
Solvent: cdcl3  
Temp: 60.0 C / 333.1 K  
Operator: dpa111  
Mercury-300 "r2d2"  
Relax. delay: 1.000 sec  
Pulse: 30.0 degrees  
Acq. time: 3.550 sec  
Width: 4803.1 Hz  
38 Repetitions  
ORSEVERE: H1, 300.2185002 MHz  
DATA PROCESSING  
F1 size: 65536  
Total time: 158 hr., 30 min., 28 sec

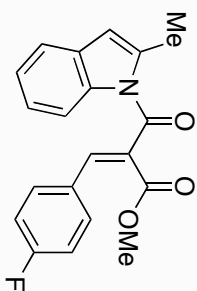

10f

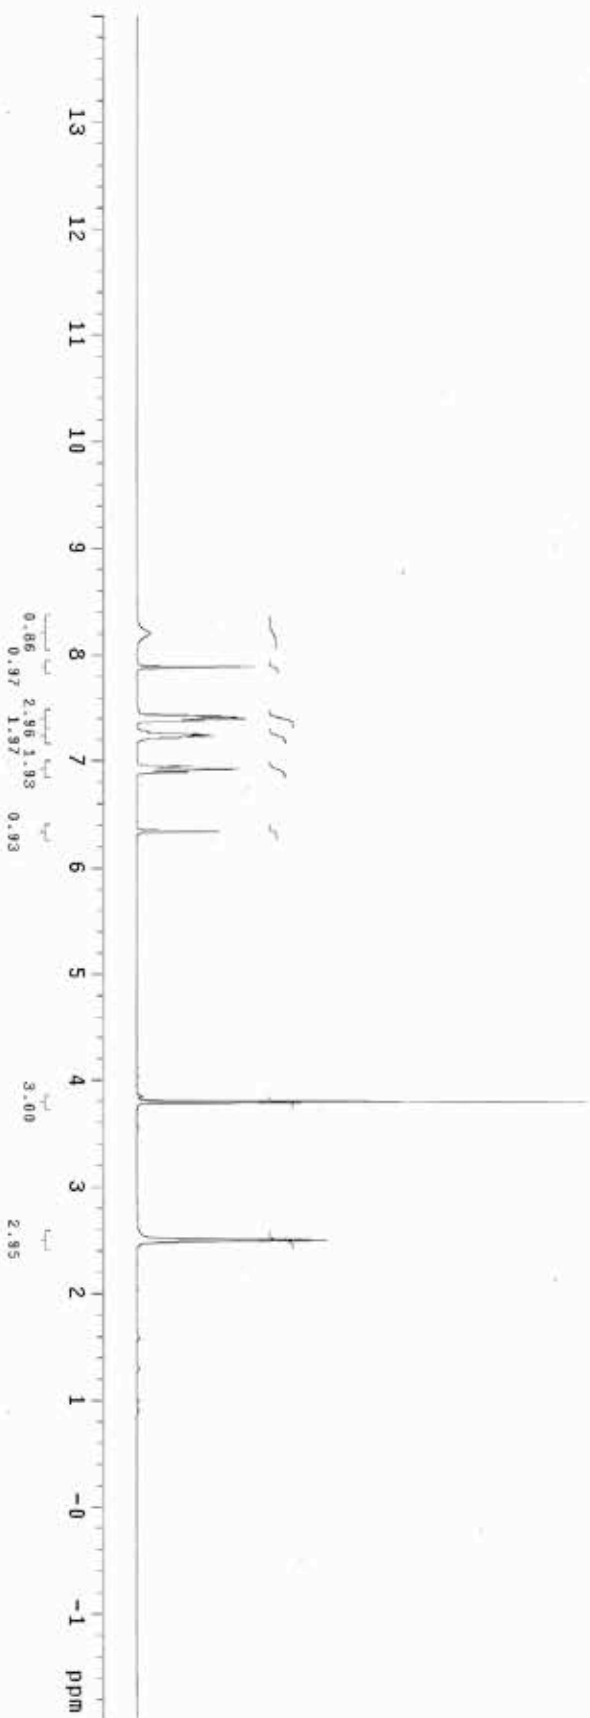

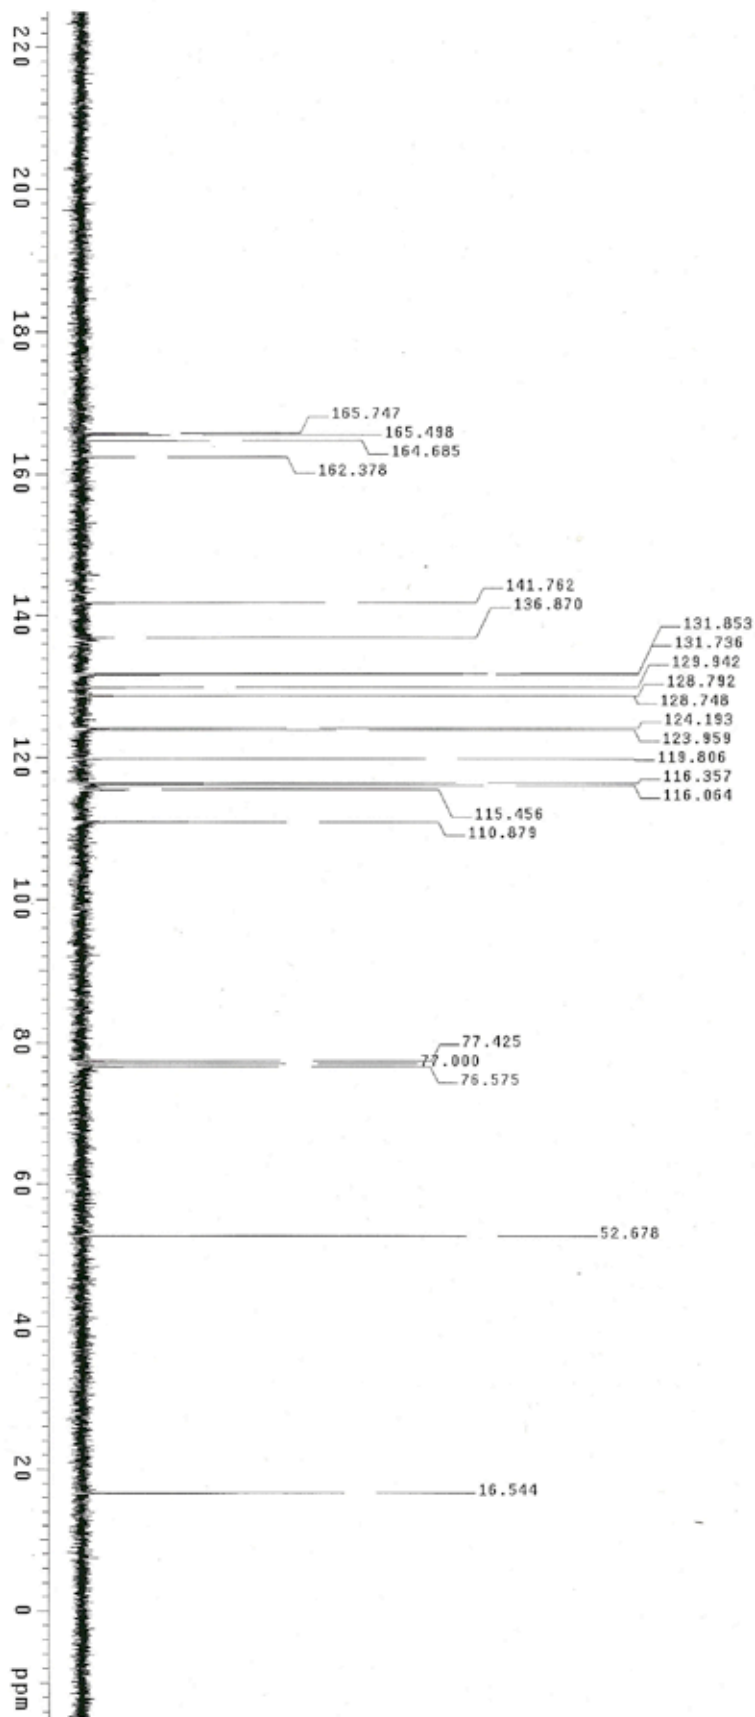

Std Carbon experiment  
Sample: NB-5-DVP-128-HHH  
File: xp  
Pulse Sequence: s2pu1  
Solvent: cdcl3  
Temp: 60.0 C / 333.1 K  
Operator: doatl1  
Mercury-300 "r2d2"  
Relax. delay 1.000 sec  
Pulse 50.0 degrees  
Acq. time 1.301 sec  
Width 18115.5 Hz  
80 repetitions 75.490028 MHz  
OBSERVE C13, 300.2199481 MHz  
DECOUPLE H1, 300.2199481 MHz  
Power 40 db  
continuously on  
WALTZ-16 modulated  
DATA PROCESSING  
Line broadening 0.5 Hz  
FI size 65536  
Total time 106 hr, 50 min, 35 sec

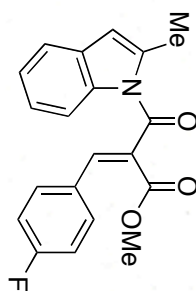

10f

NB-5-DVP-208-B-H  
Marchello 60 C

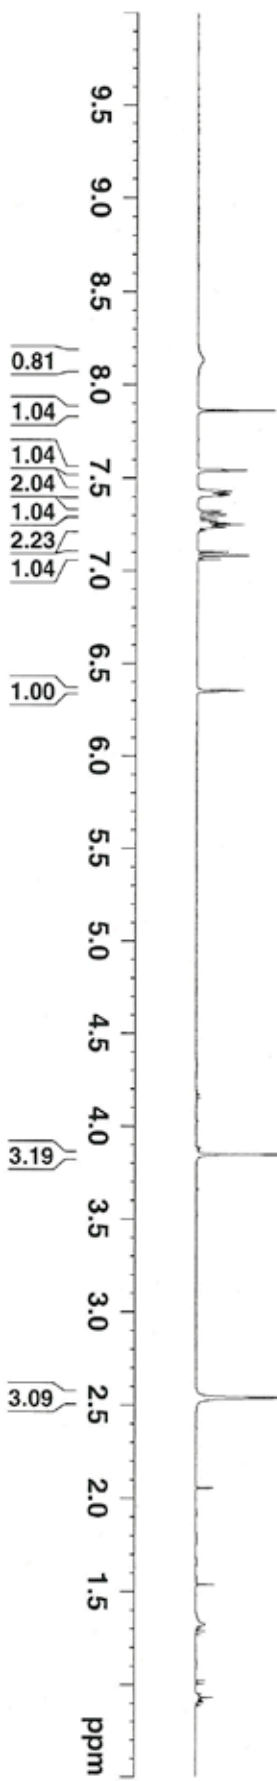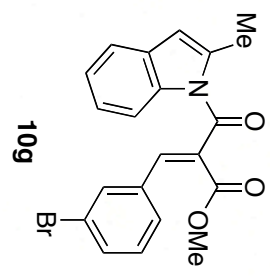

NB-5-DVP-208-B-H  
Marchello 60 C

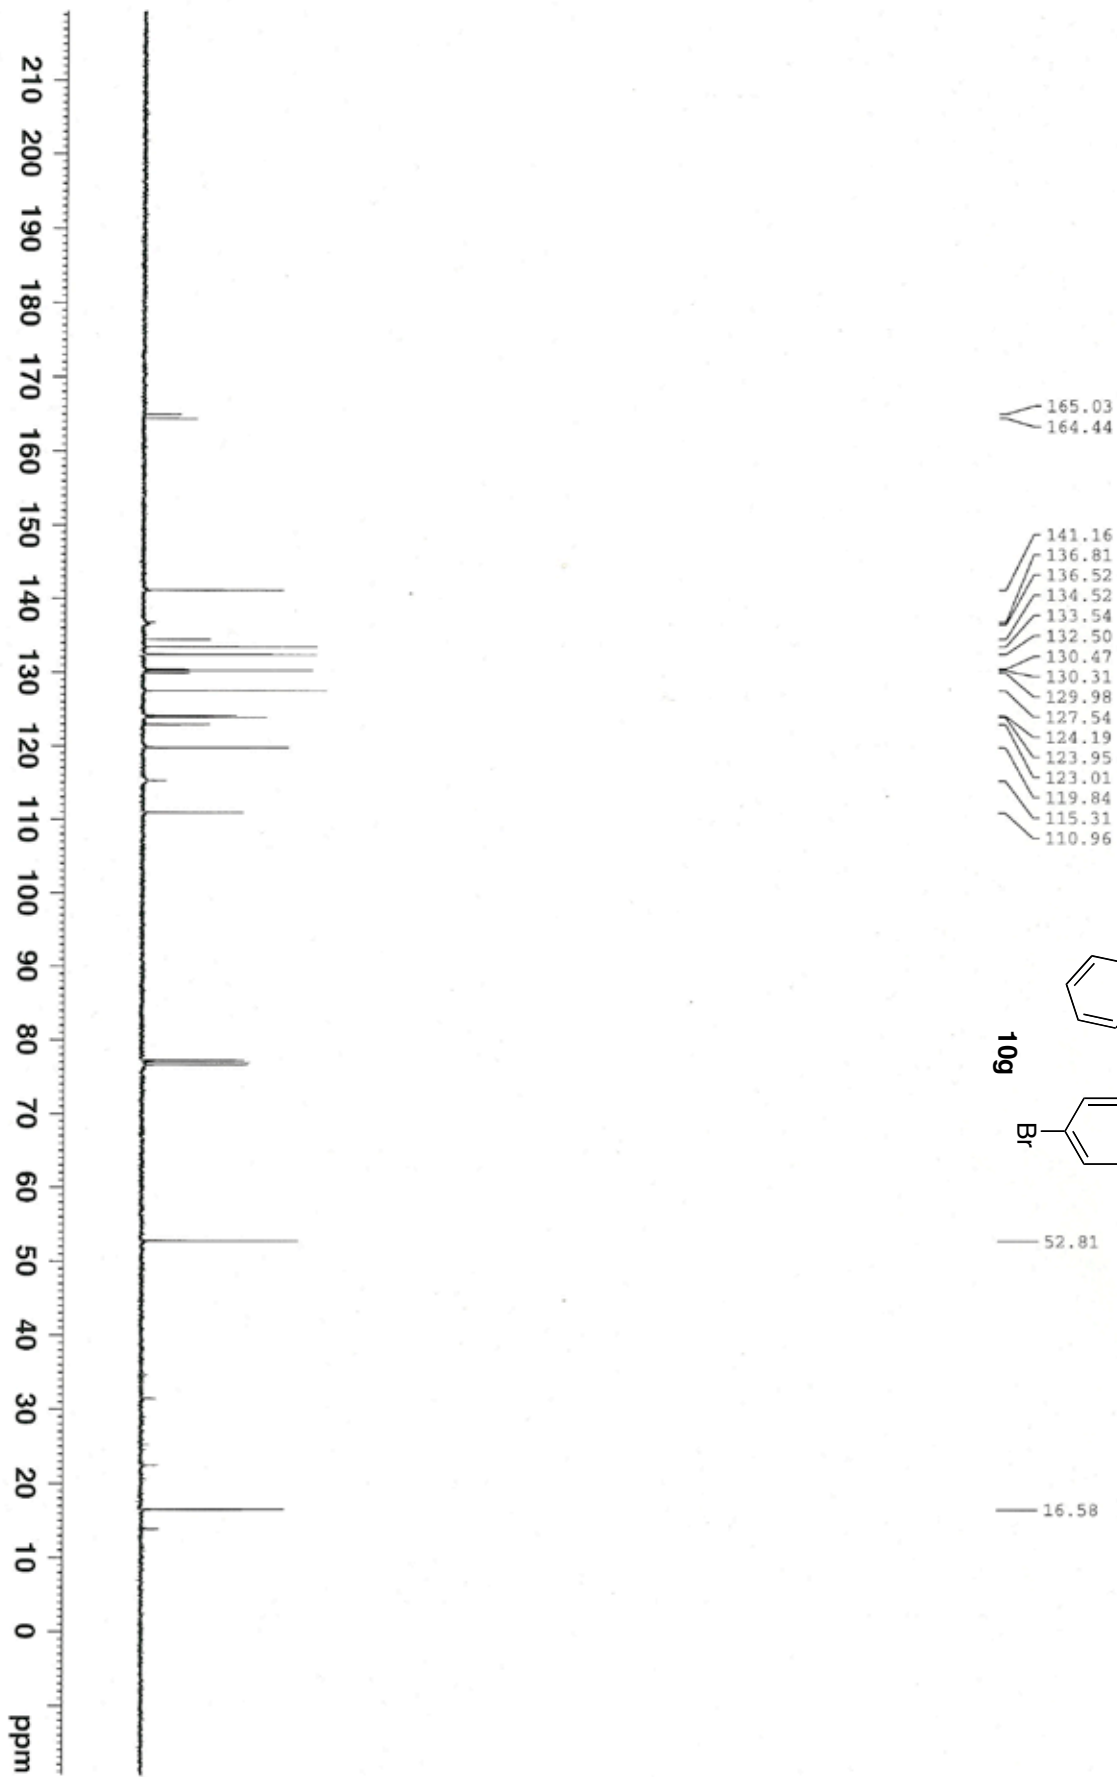

Std Proton parameters  
Sample: N8-5-DVP-208-A-H  
File: xp  
Pulse Sequence: s2pu1  
Solvent: cdcl3  
Acq. temperature  
Operator: gpm11242  
Mercury-300 "1242"  
Relax. delay 1.000 sec  
Pulse 30.0 degrees  
Acq. time 3.550 sec  
Width 4803.1 Hz  
36 repetitions  
OBSERVE N1, 300.2185002 MHz  
DATA PROCESSING  
F1 size 65536  
Total time 15 hr, 51 min, 3 sec

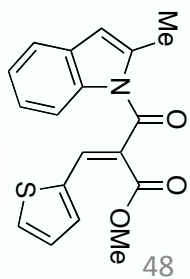

10h

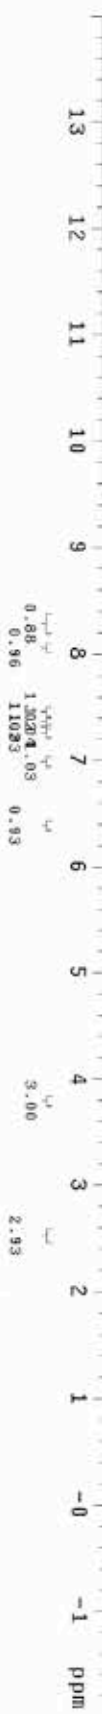



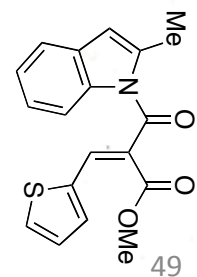

10h

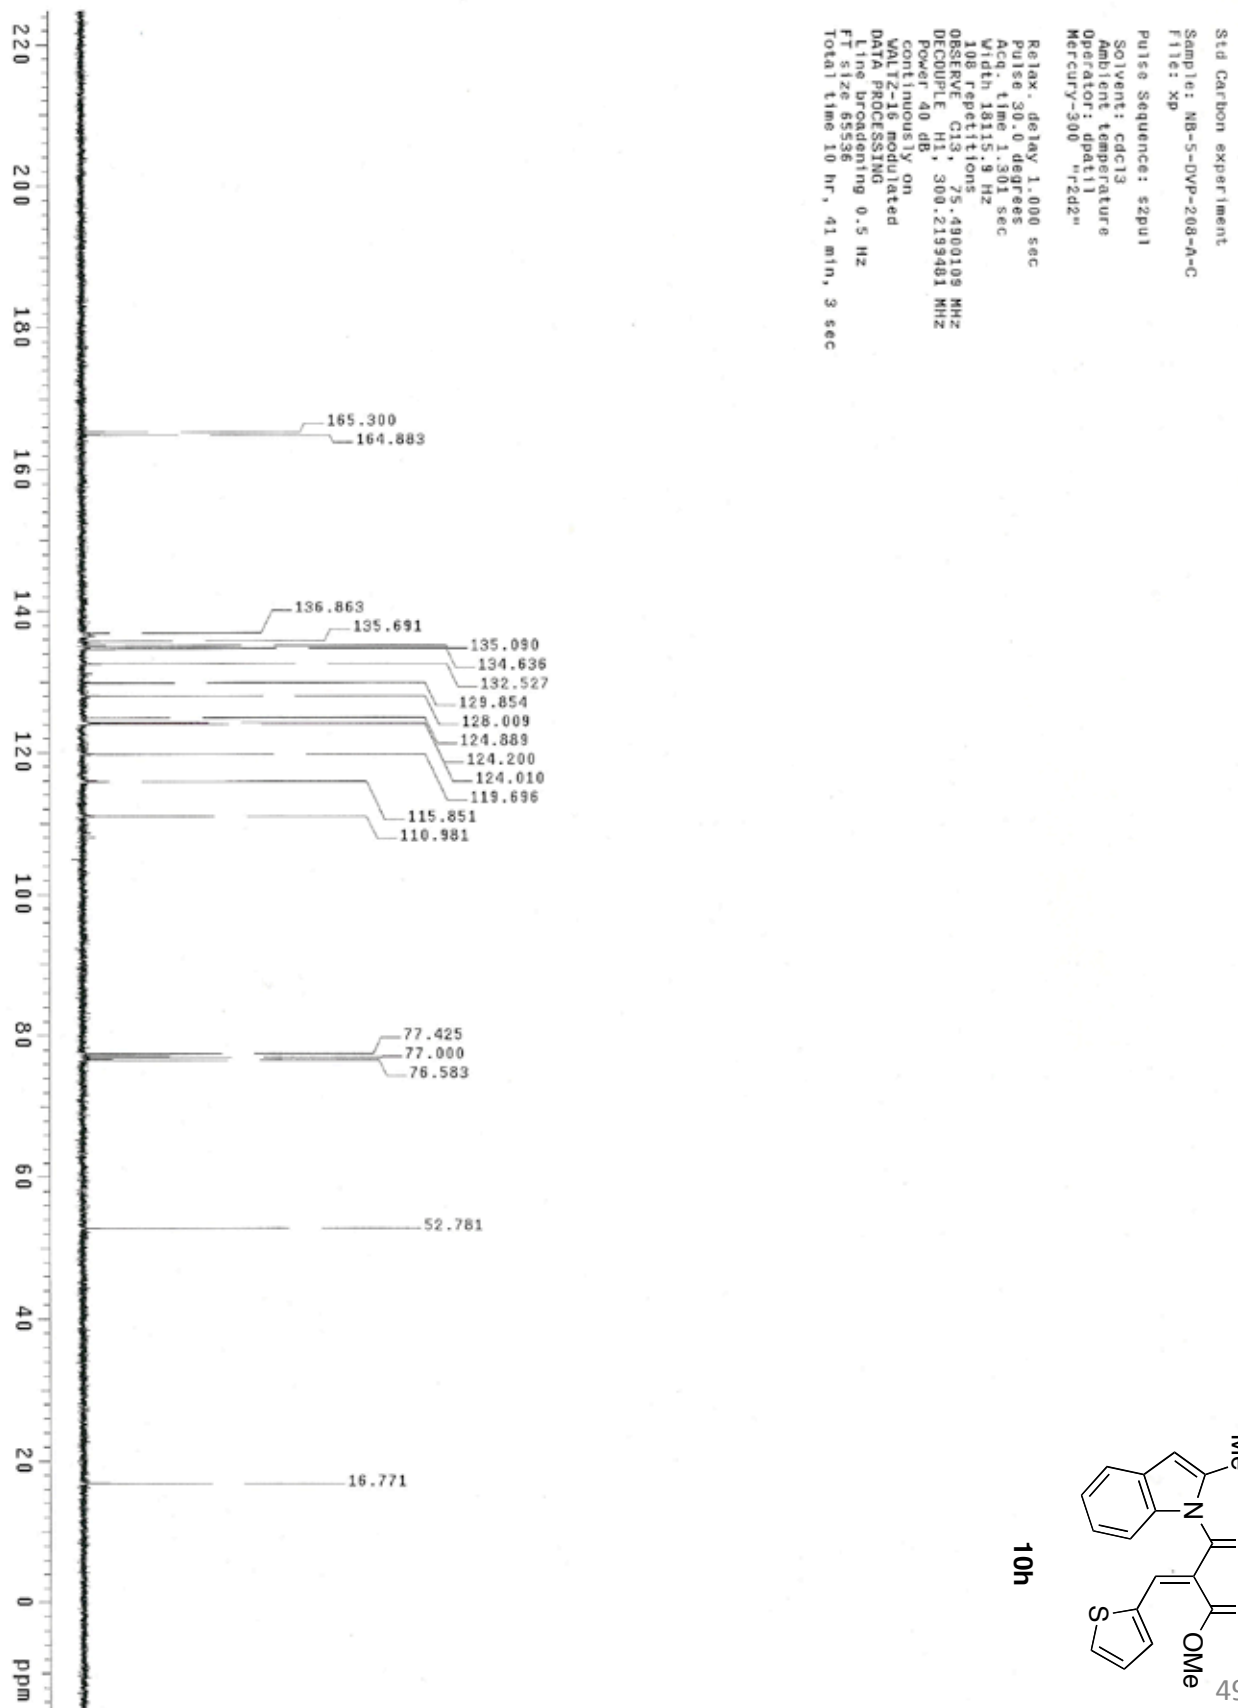

Std Proton parameters

Sample: NB-1-PG-15-A-T1-H  
File: home/france/shenje/NB-1-PG-15-A-H.fid

Pulse Sequence: s2pul1

Solvent: CDCl3  
Acquire temperature  
Operator: s2pul1  
File: NB-1-PG-15-A-H  
Mercury-300 -T2D2"

Relax. delay 1.000 sec  
Pulse 30.0 degrees  
Acq. time 3.550 sec  
Width 4803.1 Hz  
20 repetitions  
OBSERVE H1, 300.219446 MHz  
DATA PROCESSING  
FT size 65536  
Total time 1 hr, 35 min, 6 sec

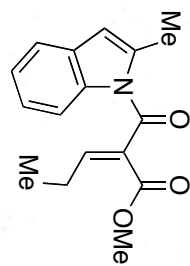

10i

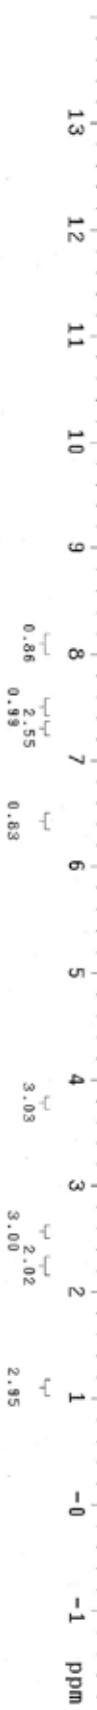

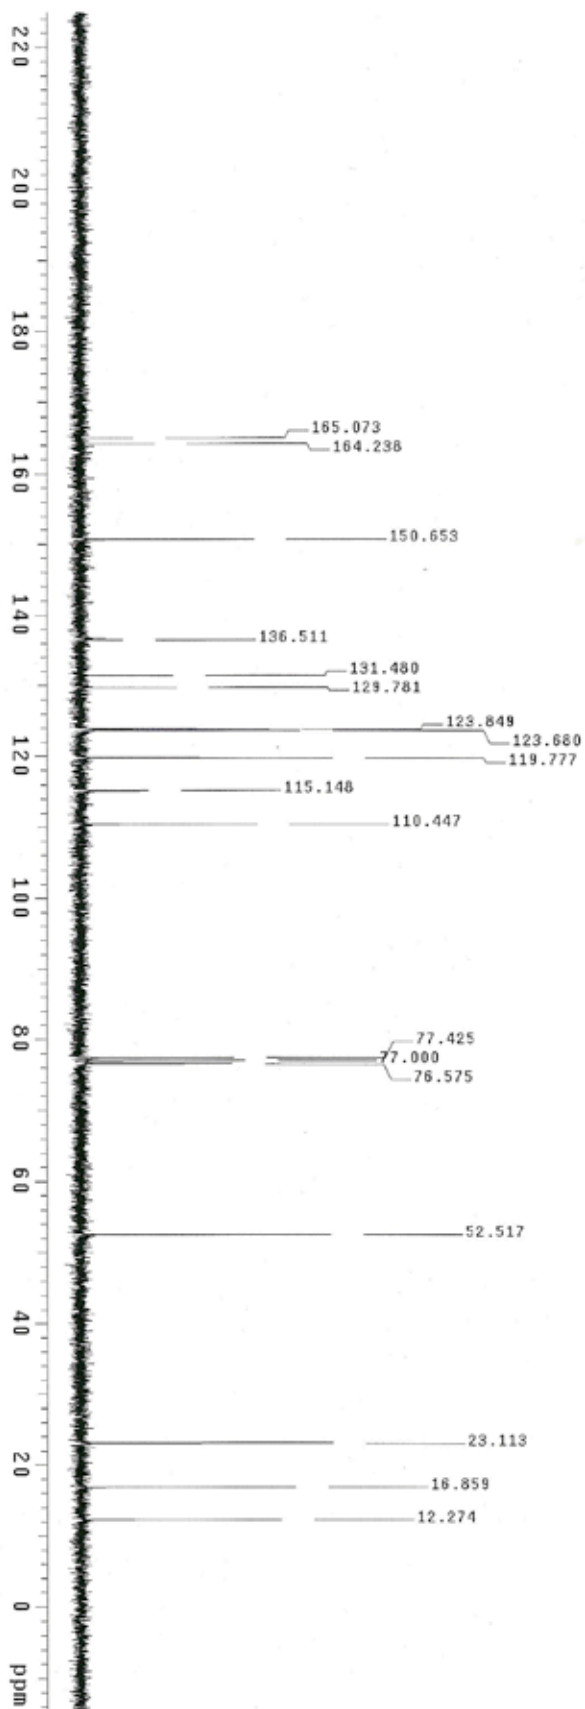

Std Carbon experiment  
Sample: NB-1-PG-15-A-T1-H  
File: xp  
Pulse Sequence: s2pu1  
Solvent: CDCl3  
Ambient temperature  
Operator: shen  
Mercury-300 "1242"  
Relax. delay 1.000 sec  
Pulse 30.0 degrees  
Acq. time 1.301 sec  
Width 16115.9 Hz  
90 repetitions  
OBSERVE C13, 75.4900071 MHz  
DECUPLE H1, 300.219481 MHz  
Power 40 dB  
continuously on  
WALTZ-16 modulated  
DATA PROCESSING  
Line broadening 0.5 Hz  
F1 size 65936  
Total time 1 hr, 4 min, 6 sec

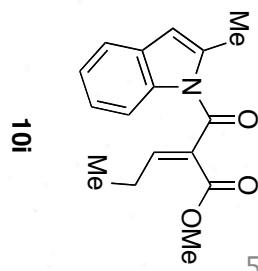

Sid Proton parameters  
Sample: NB-5-DVP-120-A-H  
File: xp  
Pulse Sequence: zgpg30  
Solvent: CDCl3  
Ambient temperature  
Operator: dpat11  
Mercury-300 "r2d2"  
Relax. delay: 1.000 sec  
Pulse: 30.0 degrees  
Acq. time: 3.550 sec  
Width: 4803.1 Hz  
16 repetitions  
OBSERVE H1: 300.2185002 MHz  
DATA PROCESSING  
FT size: 65536  
Total time: 1 min, 16 sec

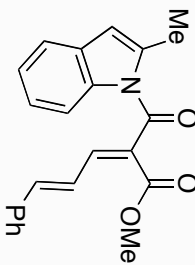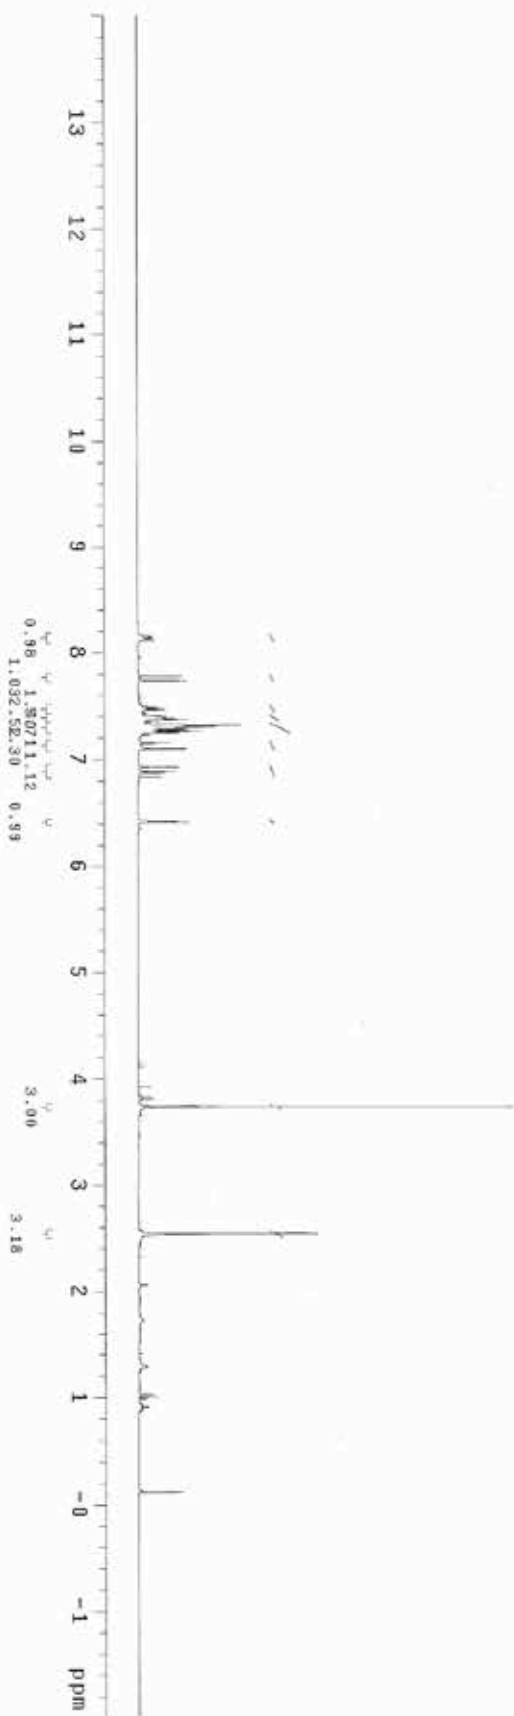

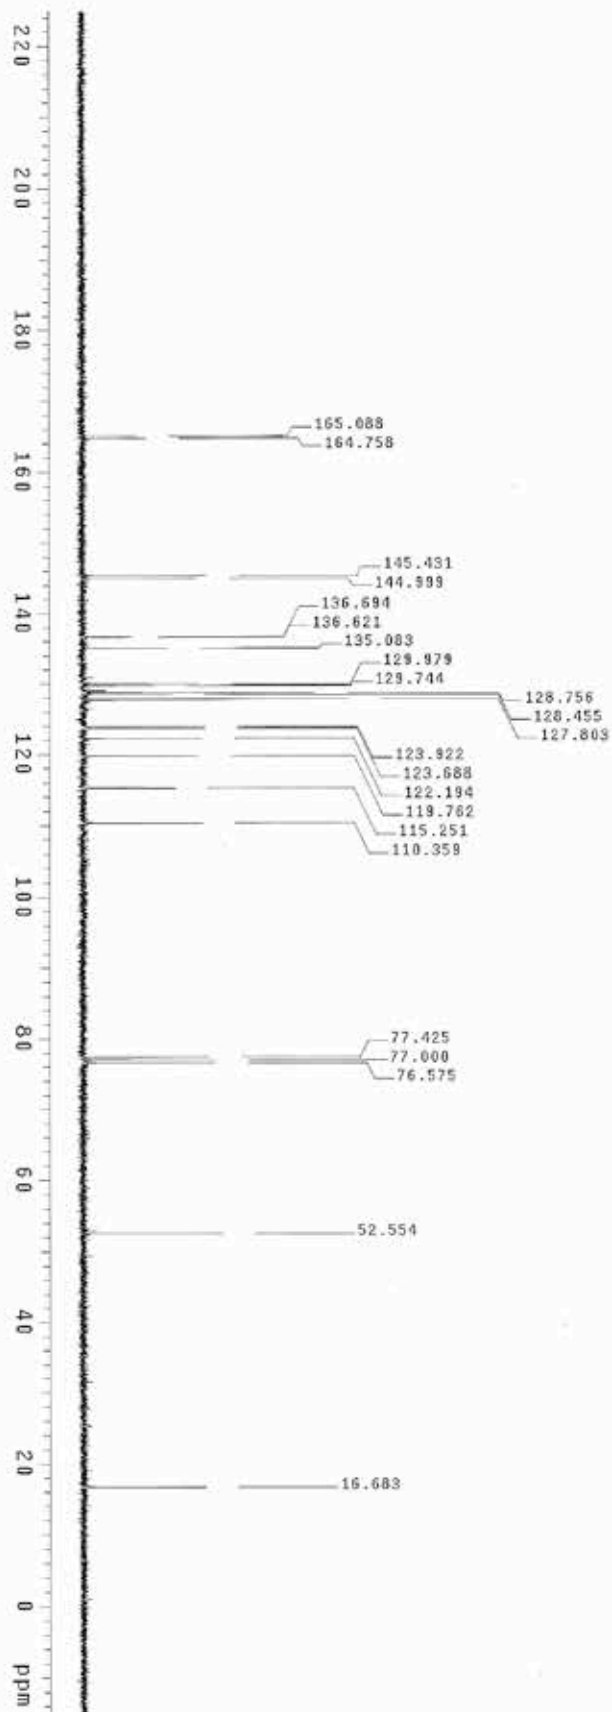

Std Carbon experiment  
Sample: N8-5-DVP-120-A-H  
File: xp  
Pulse Sequence: zgpg30  
Solvent: CDCl3  
Ambient Temperature  
Operator: opad11  
Mercury-300 "1202"  
Relax. delay 1.000 sec  
Pulse 30.0 degrees  
Acq. time 1.301 sec  
Width 18115.8 Hz  
96 repetitions  
OBSERVE C13, 75.4900109 MHz  
DECUPLE H1, 300.2199481 MHz  
Power 40 dB  
continuously on  
WALTZ-16 modulated  
DATA PROCESSING  
Line broadening 0.5 Hz  
F1 size 65536  
Total time 10 min, 45 sec

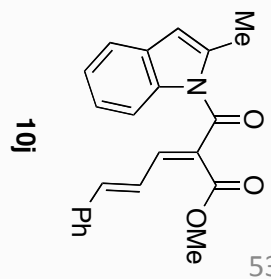

II-MAC-39-H-T2  
Sample: II-MAC-39-H-T2  
File: home/france/cavitt/II-MAC-39-H-T2.FID  
Pulse Sequence: s2pul  
Solvent: CDCl3  
Ambient temperature  
Operator: cavitt  
File: II-MAC-39-H-T2  
Mercury-300 "f2d2"  
Relax. delay 1.000 sec  
Pulse 30.0 degrees  
Acq. time 3.550 sec  
Width 4803.1 Hz  
44 repetitions  
OBSERVE IN 300.2237117 MHz  
DATA PROCESSING  
F1 SIZE 85339  
Total time 8 min, 34 sec

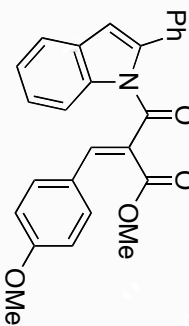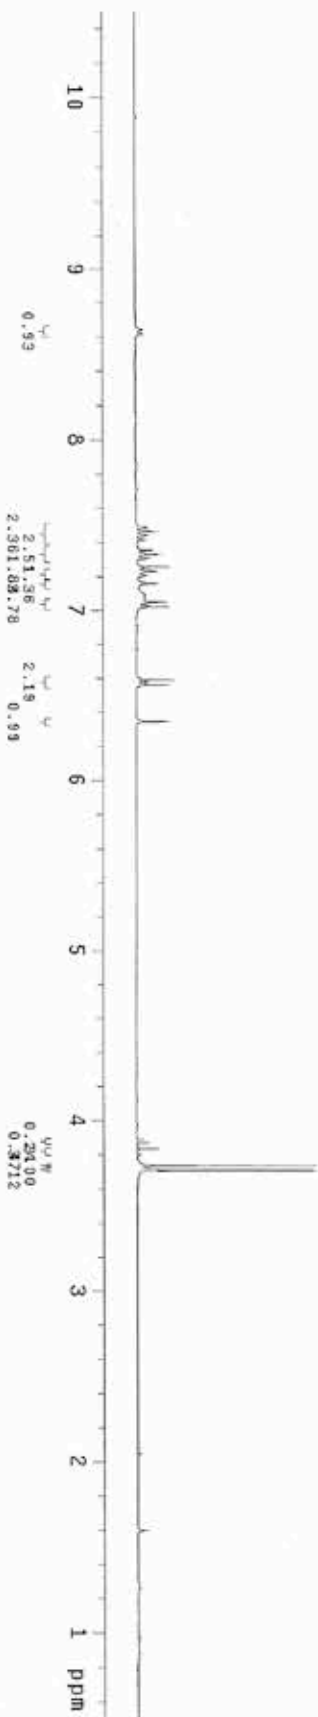

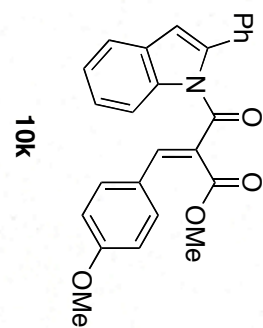

10K

II-MAC-39-C  
 Sample: II-MAC-39-C  
 File: xp  
 Pulse Sequence: e2pul  
 Solvent: cdcl3  
 Ambient temperature  
 Operator: CAVITT  
 Mercury-300 "f2d2"  
 Relax. delay 1.000 sec  
 Pulse 30.0 degrees  
 Acq. time 1.301 sec  
 Width 18113.9 Hz  
 232 repetitions  
 OBSERVE C13, 75.4919151 MHz  
 DECOUPLE H1, 300.2251667 MHz  
 Power 40.00 dB  
 Continuously on  
 WALTZ160 simulated  
 DATA PROCESSING 0.5 Hz  
 File Z: 65536  
 Total time 856 hr., 47 sec

| INDEX | FREQUENCY PPM | HEIGHT  |
|-------|---------------|---------|
| 1     | 12508.9       | 166.759 |
| 2     | 12411.4       | 164.408 |
| 3     | 12189.1       | 161.454 |
| 4     | 10799.3       | 143.053 |
| 5     | 10553.8       | 139.802 |
| 6     | 10433.3       | 138.205 |
| 7     | 10069.5       | 133.386 |
| 8     | 9932.4        | 131.570 |
| 9     | 9782.0        | 129.578 |
| 10    | 9706.8        | 128.582 |
| 11    | 8844.9        | 127.762 |
| 12    | 9464.1        | 125.367 |
| 13    | 9452.0        | 125.206 |
| 14    | 9438.1        | 125.023 |
| 15    | 9383.4        | 124.298 |
| 16    | 9077.1        | 120.241 |
| 17    | 8804.6        | 116.630 |
| 18    | 8604.4        | 113.979 |
| 19    | 8447.4        | 111.899 |
| 20    | 5844.6        | 77.421  |
| 21    | 5812.5        | 76.986  |
| 22    | 5781.0        | 76.578  |
| 23    | 4171.6        | 55.260  |
| 24    | 3943.9        | 52.243  |

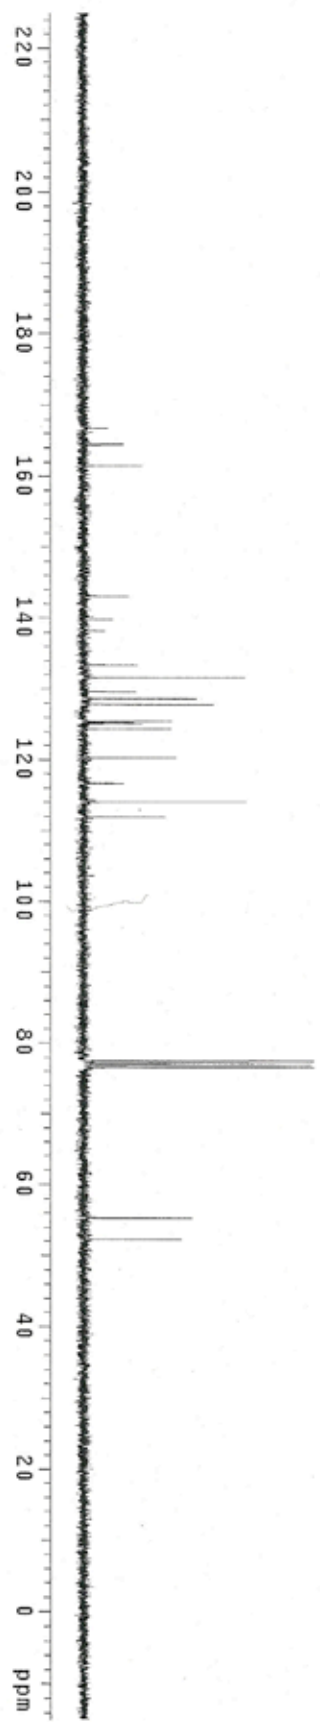

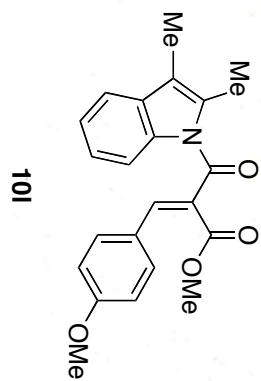

56

Std Proton parameters  
Sample: NB-5-DVP-33-A-HH  
File: home/france/dpat11/NB-5-DVP-33-A-HH.fid  
Pulse Sequence: s2pu1  
Solvent: cdcl3  
Temp: 20.0 C / 293.1 K  
Operator: dpat11  
File: NB-5-DVP-33-A-HH  
Mercury-300 "r2d2"  
Relax. delay: 1.000 sec  
Pulse: 30.0 degrees  
Acq. time: 3.550 sec  
Width: 4803.1 Hz  
28 repetitions  
OBSERVE: H1, 300.2185284 MHz  
DATA PROCESSING  
FI size: 65536  
Total time: 15 hr, 51 min, 3 sec

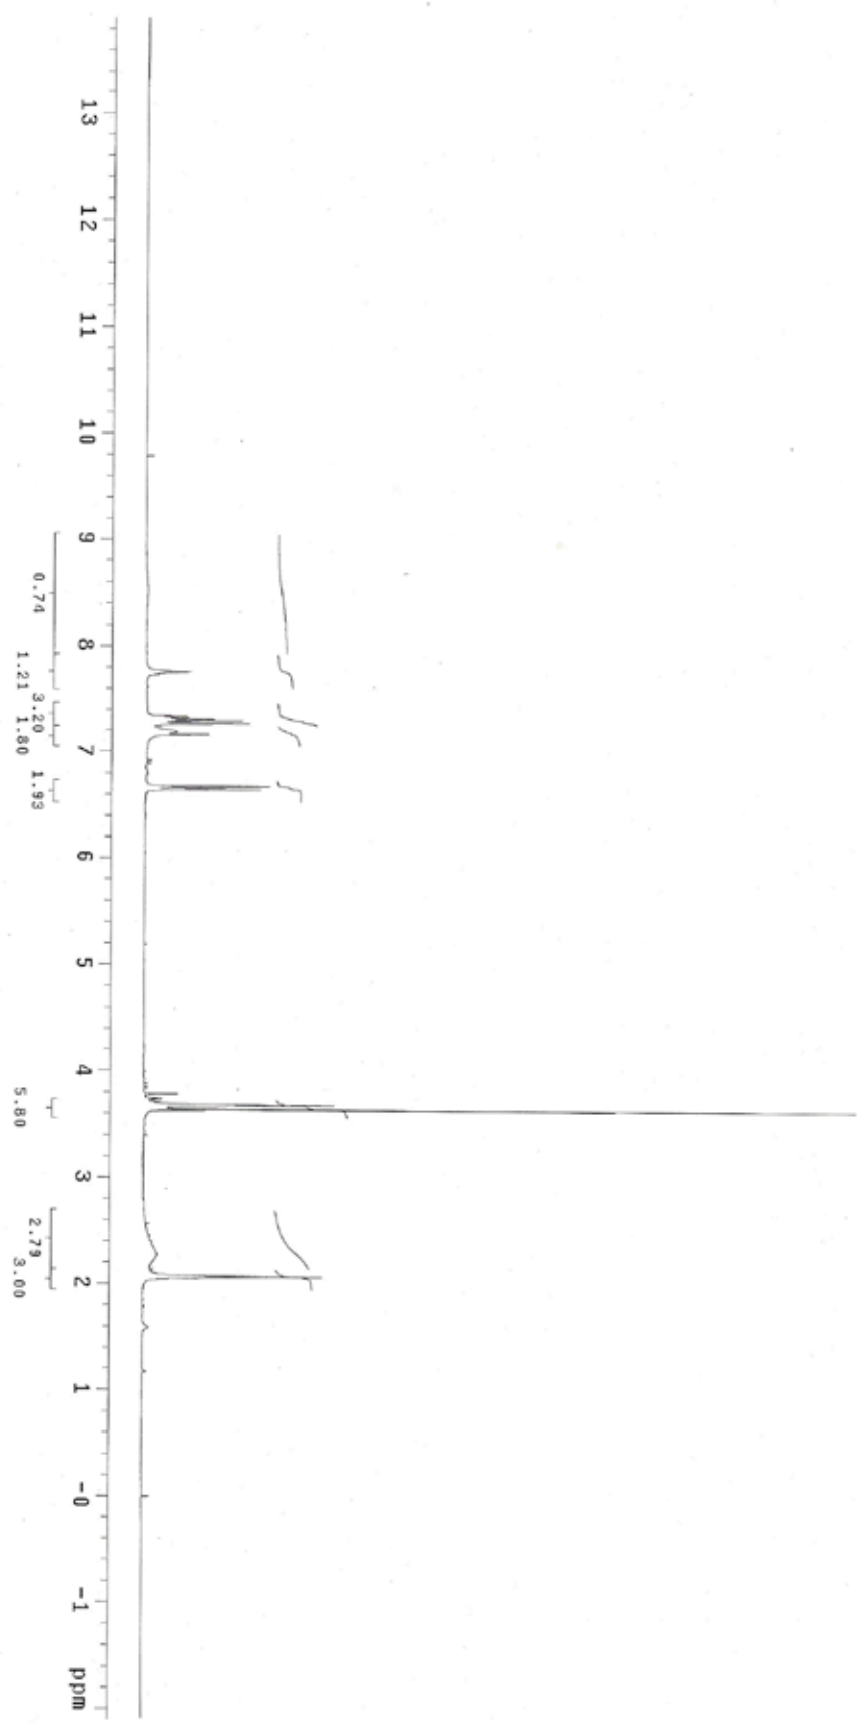



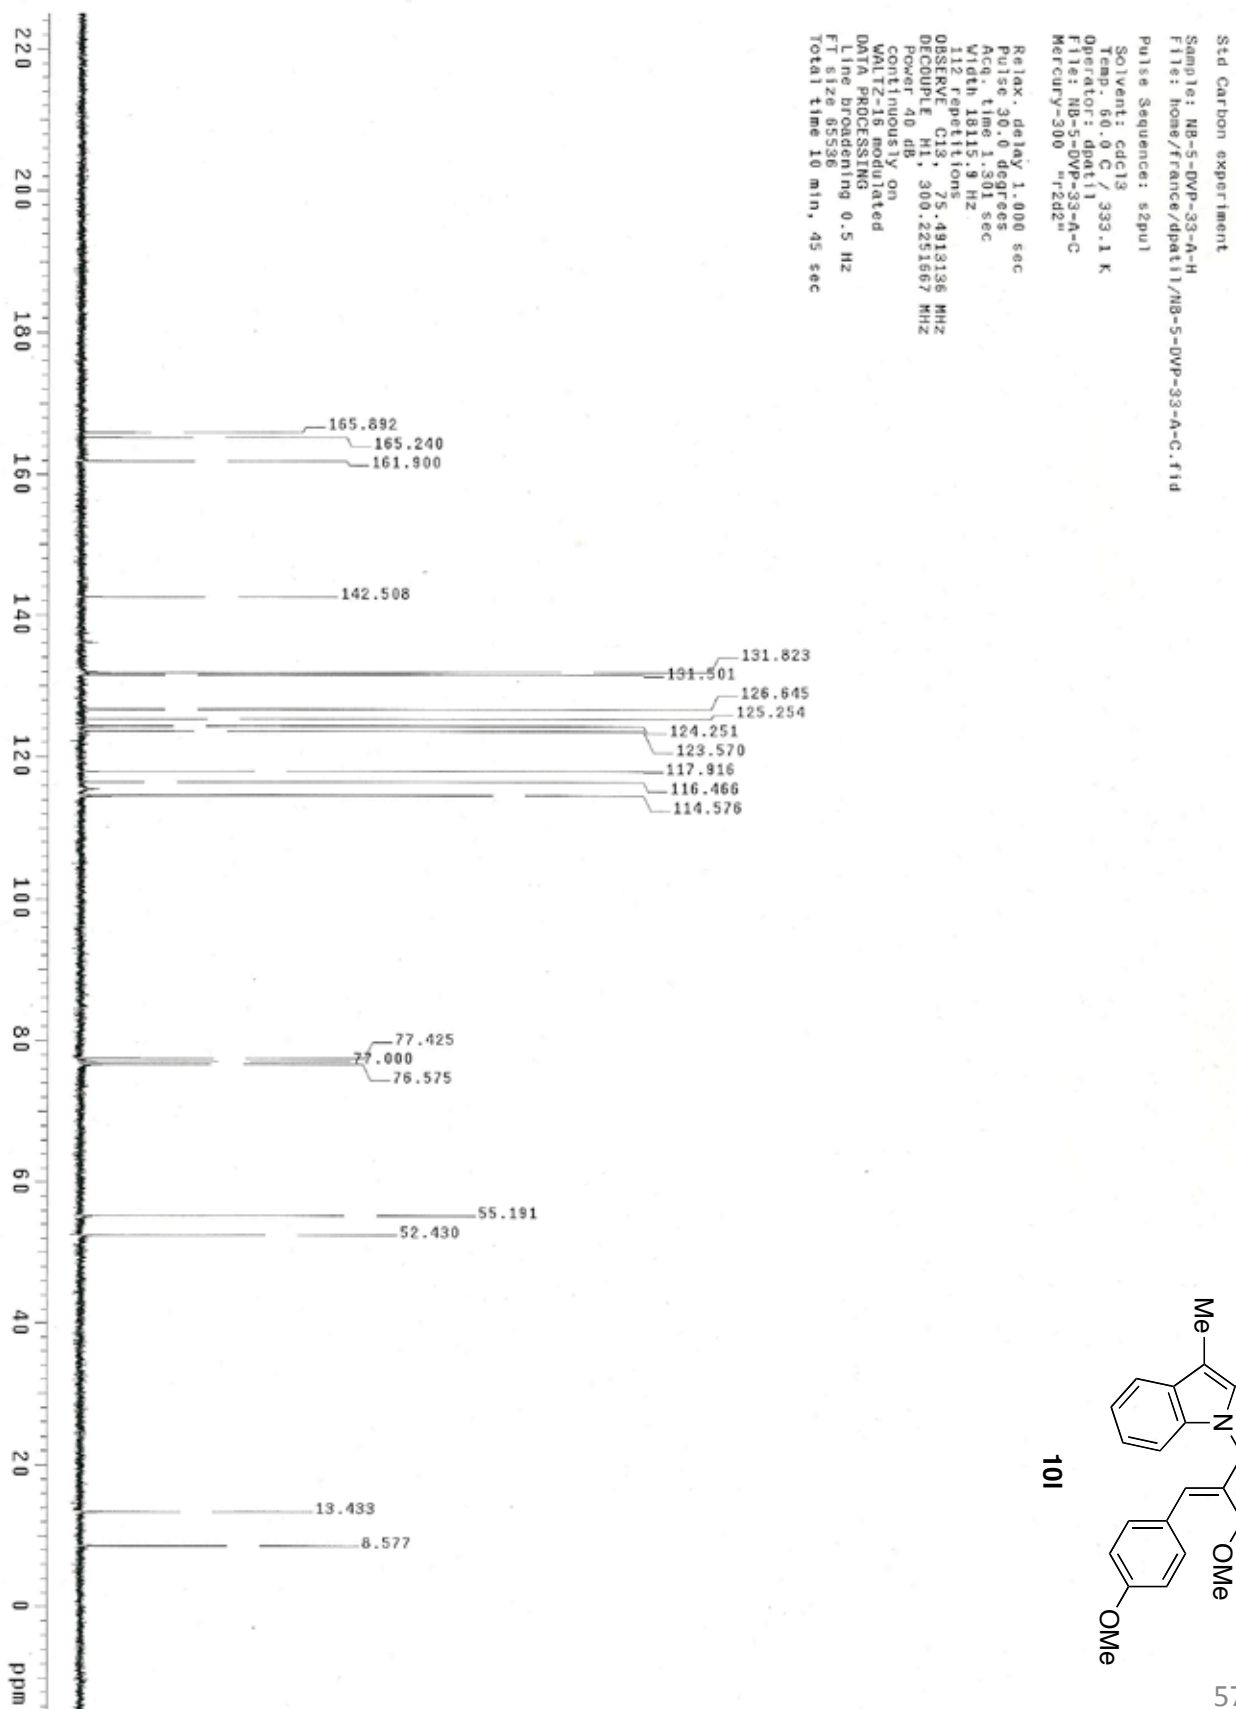

Std Proton parameters  
Sample: NB-5-DVP-151-A-H  
File: xp  
Pulse Sequence: zgpg30  
Solvent: cdcl3  
Ambient Temperature  
Operator: opat11  
Mercury-300 "r202"  
Relax. delay 1.000 sec  
Pulse 30.0 degrees  
Acq. time 3.550 sec  
Width 4803.1 Hz  
22 repetitions  
OBSERVE H1, 300.2185002 MHz  
DATA PROCESSING  
FT size 85536  
Total time 15 hr, 51 min, 3 sec

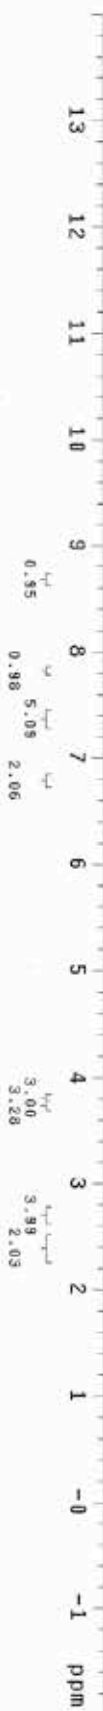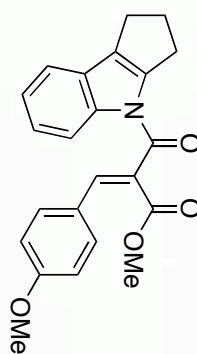

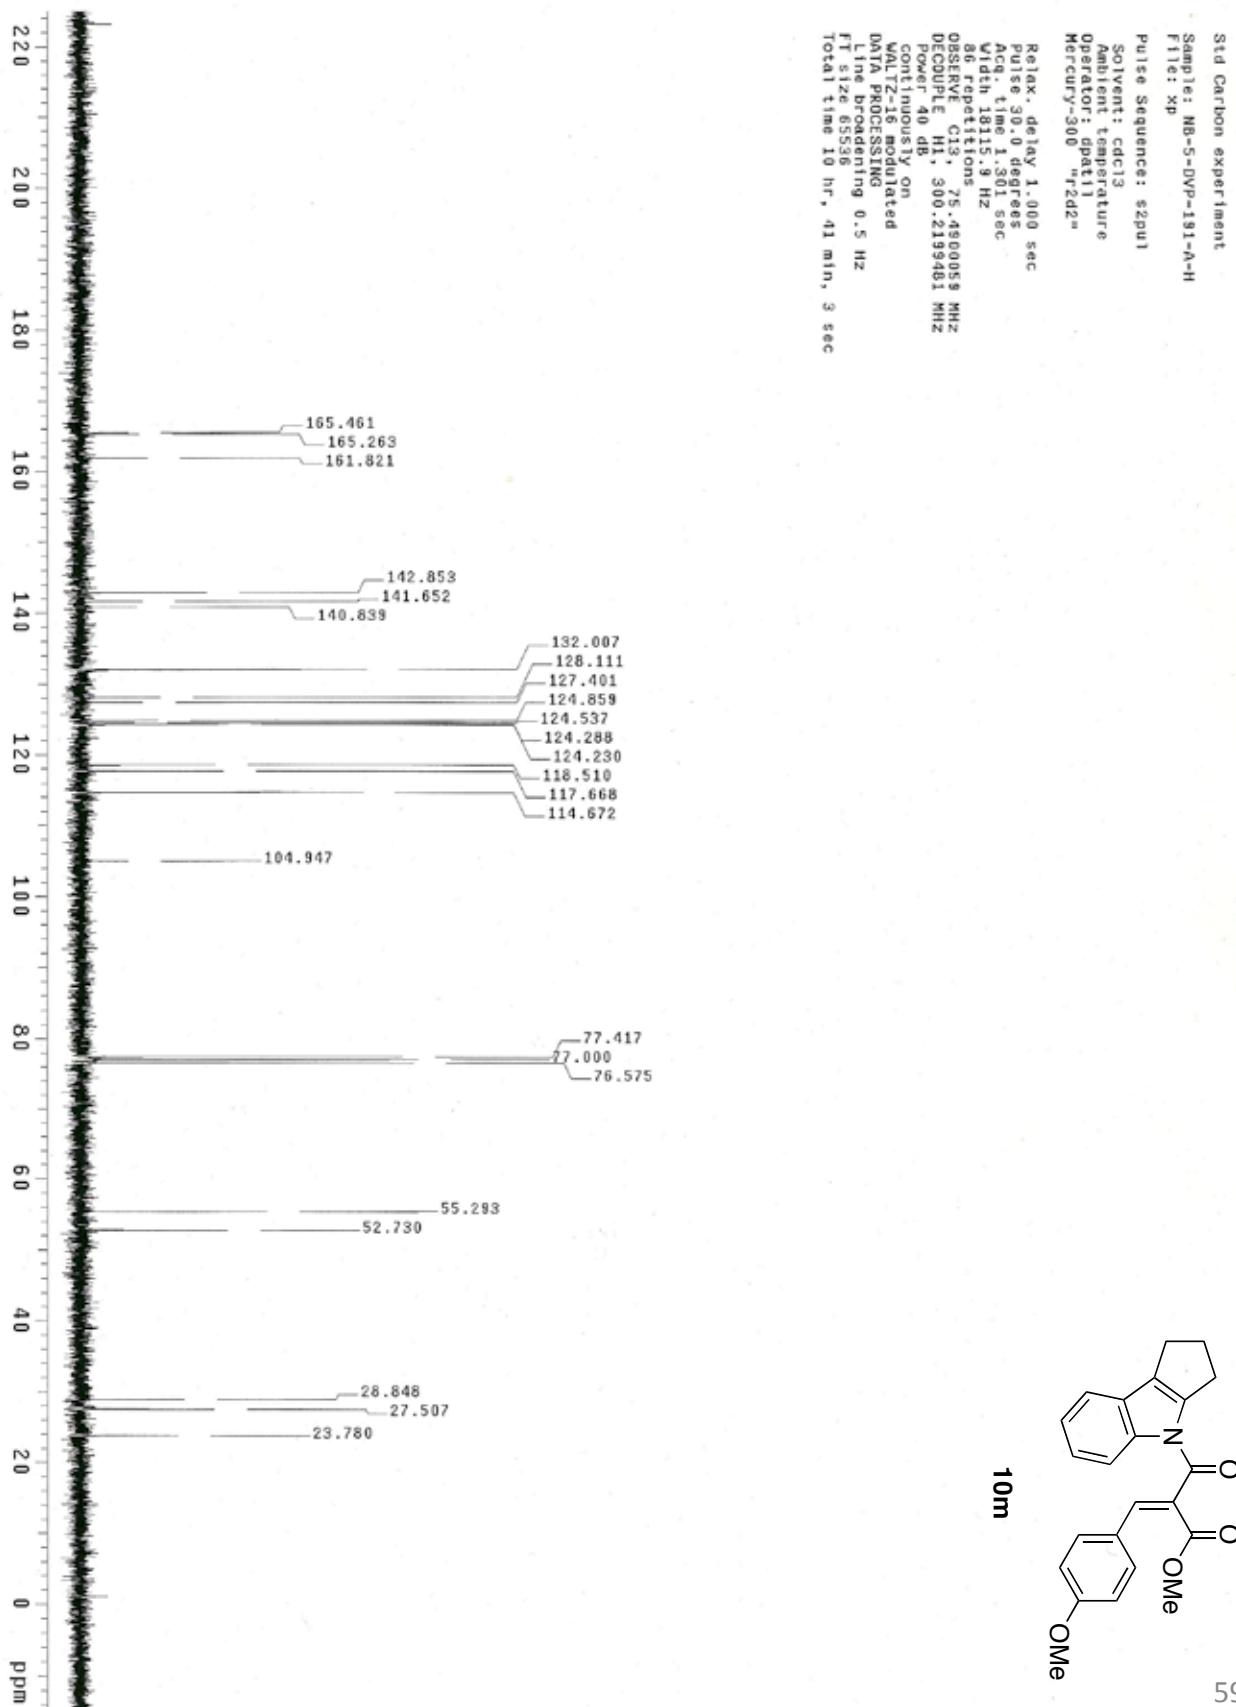

Std. Proton parameters  
Sample: NB-5-IVP-140-8-HH  
File: xp  
Pulse Sequence: s2pu1  
Solvent: cdcl3  
Temp: 60.0 C / 333.1 K  
Operator: dpat11  
Mercury-300 "r2d2"  
Relax. delay: 1.000 sec  
Pulse: 30.0 degrees  
Acq. time: 3.550 sec  
Width: 4803.1 Hz  
22 repetitions  
OBSERVE: H1, 300.2185002 MHz  
DATA PROCESSING  
F1 size: 65536  
Total time: 156 hr., 30 min., 28 sec

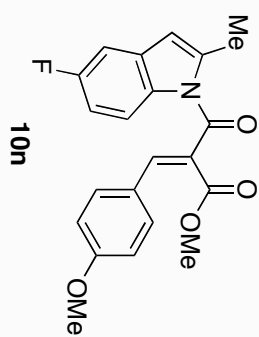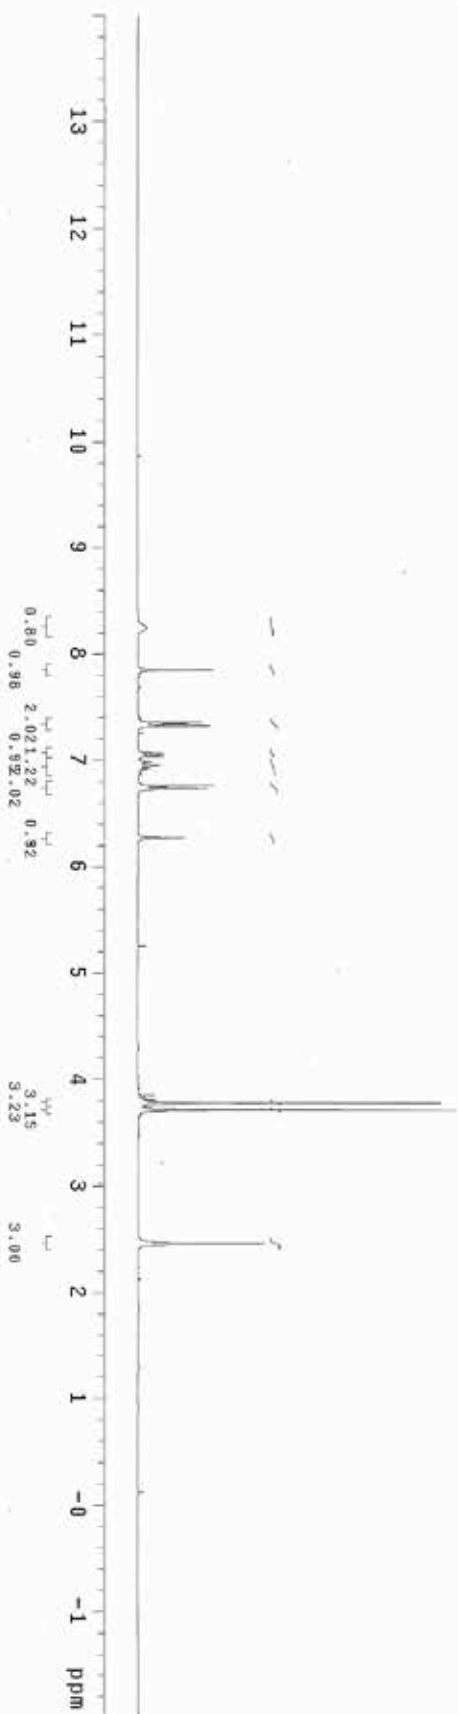

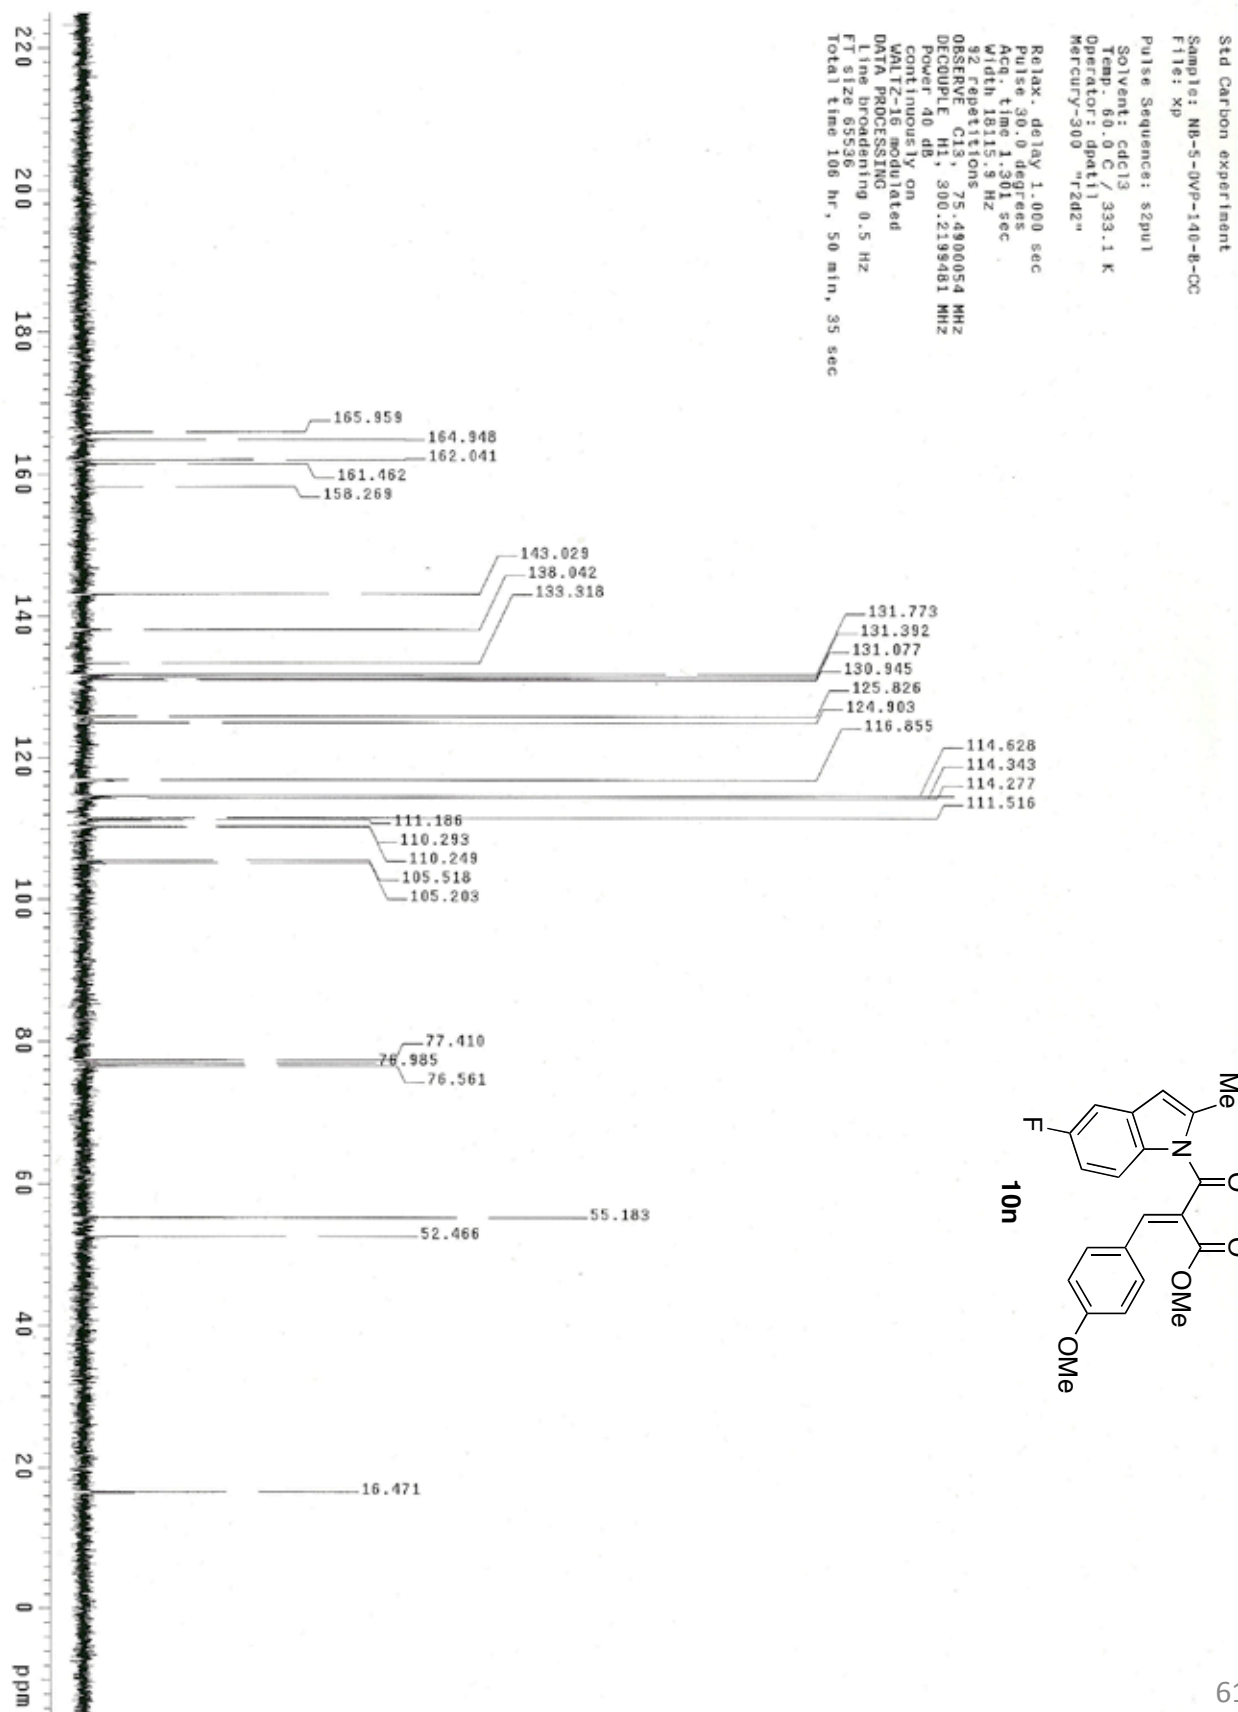

Std Proton parameters  
Sample: NB-5-OVP-191-HMH  
File: xp  
Pulse Sequence: s2pul  
Solvent: cdcl3  
Temp: 69.0 C / 333.1 K  
Operator: dpat11  
Mercury-300 "r2d2"  
Relax. delay 1.000 sec  
Pulse 30.0 degrees  
Acq. time 3.950 sec  
Width 4803.1 Hz  
29 Repetitions  
OBSERVE H1, 300.2185002 MHz  
DATA PROCESSING  
F1 size 65536  
Total time 158 hr, 30 min, 28 sec

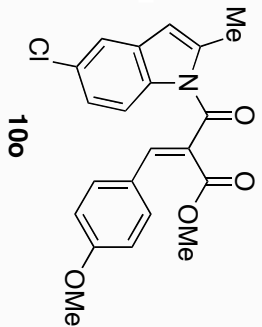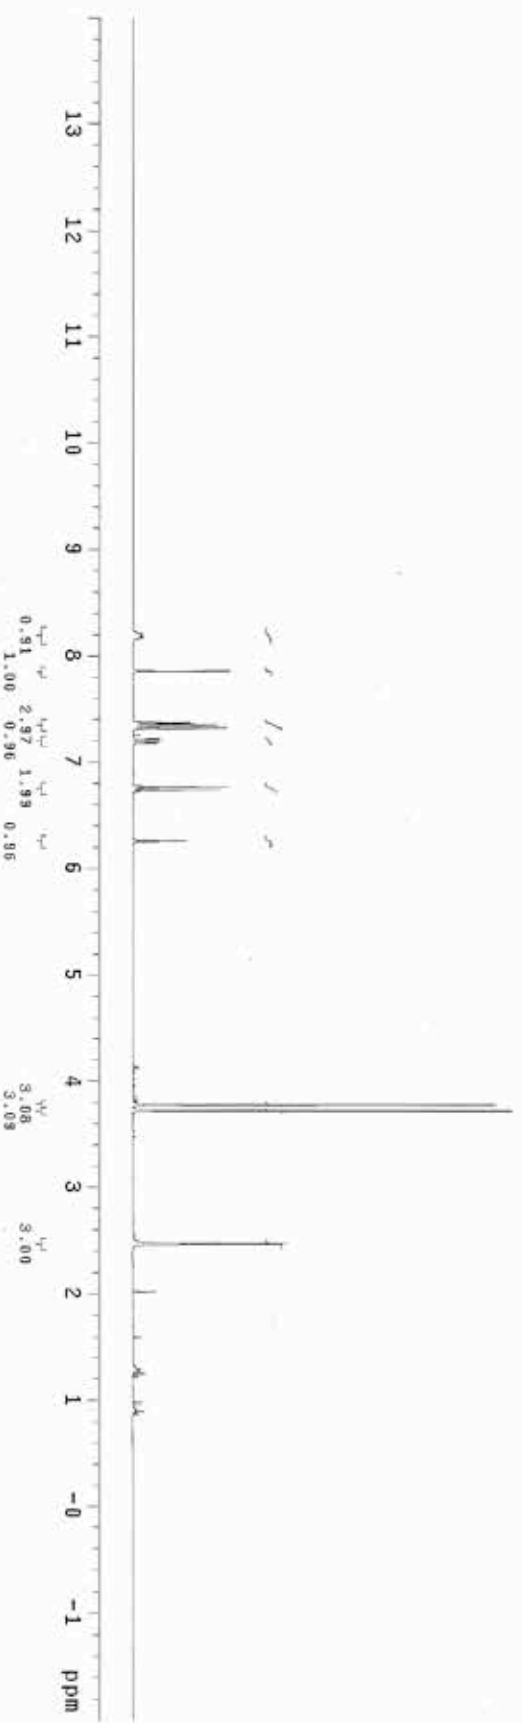

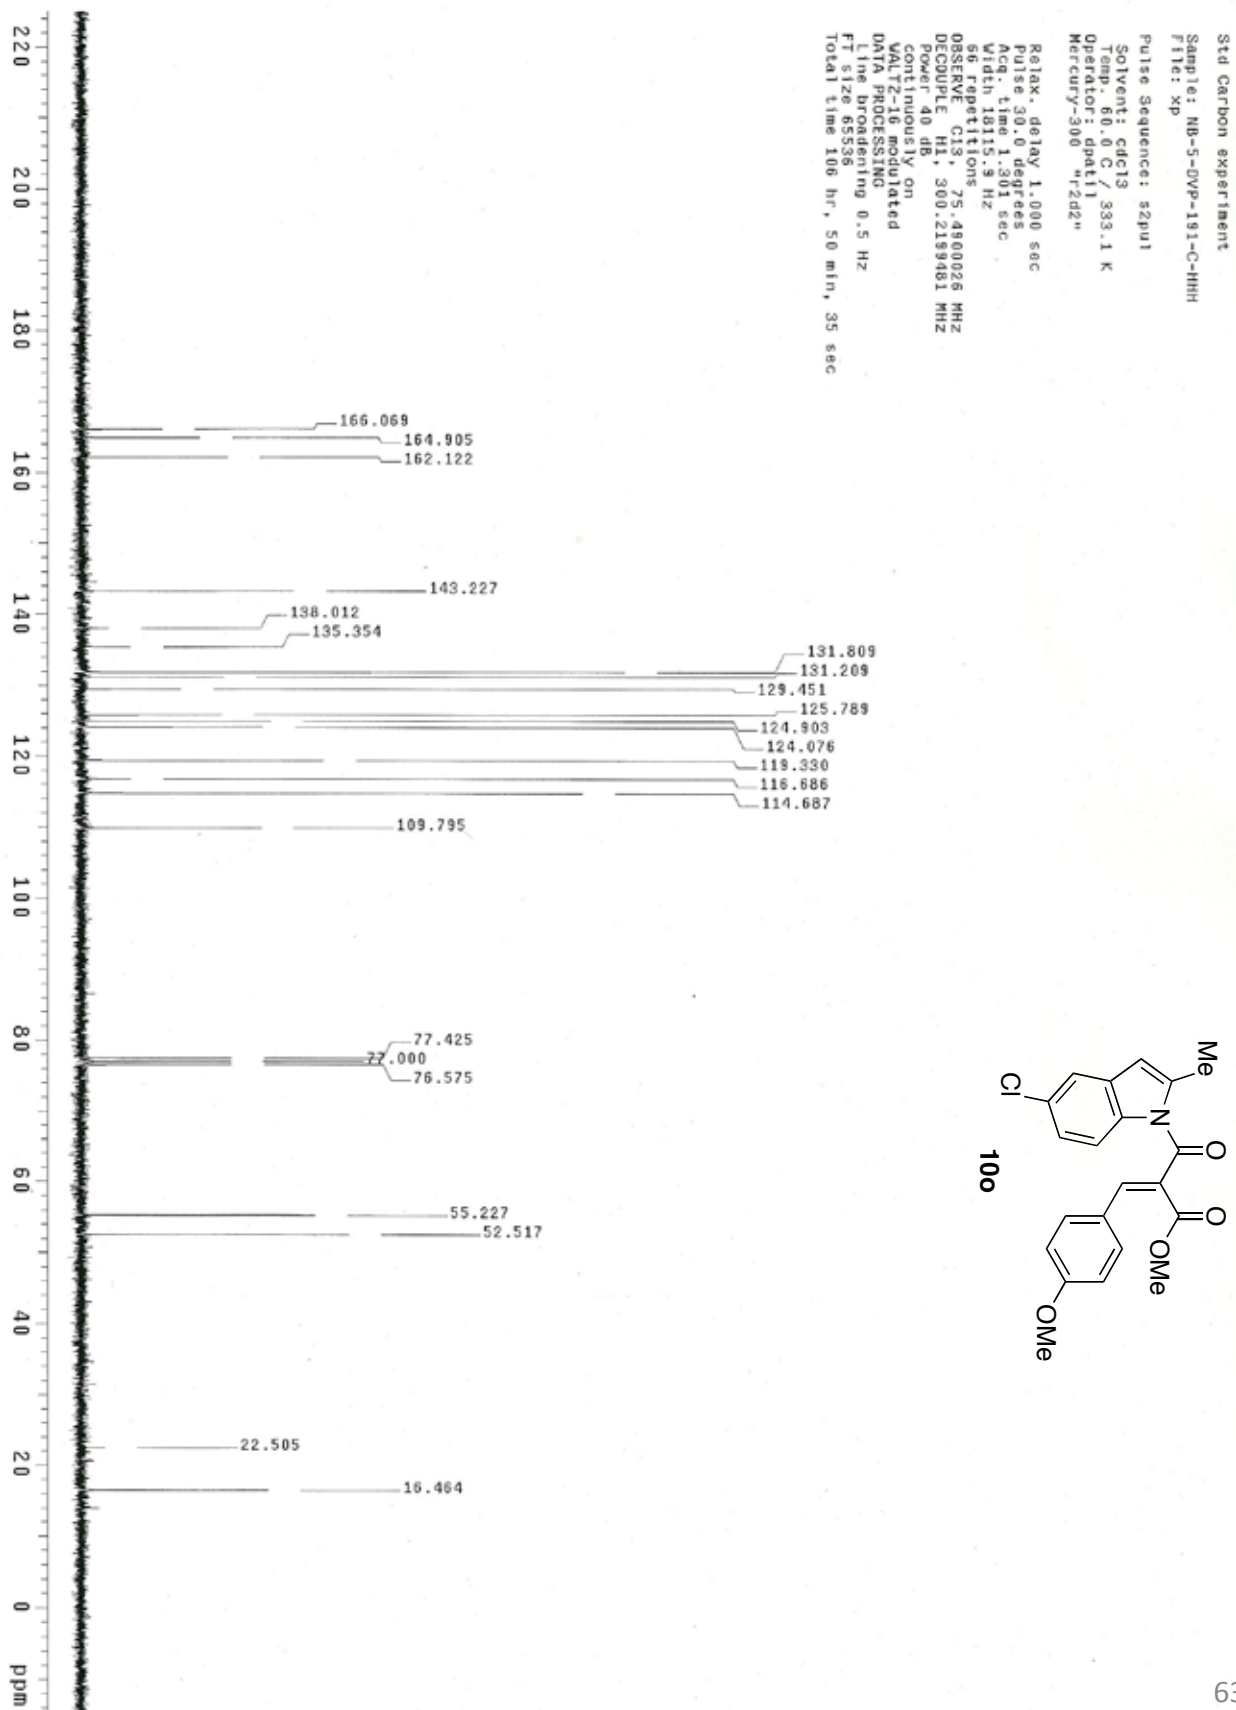

II-MAC-46-H  
File: home/france/cavitt/II-MAC-46-H.fid  
Pulse Sequence: s2pul  
Solvent: cdcl3  
Ambient temperature  
Operator: cavitt  
File: II-MAC-46-H  
Mercury-300 "F202"  
Relax. delay 1.000 sec  
Pulse 30.0 degrees  
Acq. time 3.550 sec  
Width 4803.1 Hz  
38 repetitions  
OBSERVE H1, 300.2237110 MHz  
DATA PROCESSING  
FT size 65536  
Total time 8 min, 34 sec

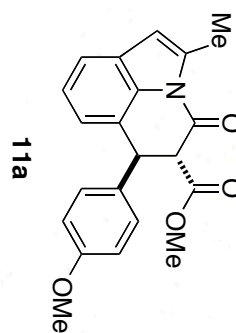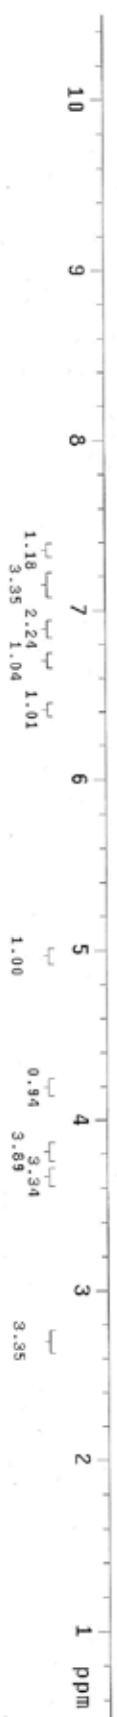



II-MAC-46-C

File: xp

Pulse Sequence: s2pu1

Solvent: cdcl3

Temp: 29.0 C, 293.1 K

Operator: cwi114

Mercury-300 "F202"

Relax. delay 1.000 sec

Pulse 30.0 degrees

Acq. time 1.301 sec

Width 18115.9 Hz

1427 repetitions

OBSERVE C13, 75.419159 MHz

DECOUPLE H1, 300.225167 MHz

Power 40 db

continuously on

WALTZ-16 modulated

DATA PROCESSING

Line broadening 0.5 Hz

F1 size 65539

Total time 650 hr, 47 sec

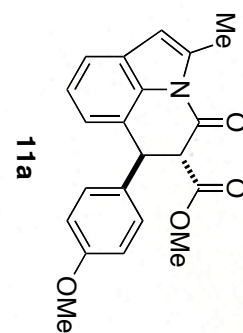

| INDEX | FREQUENCY | PPM     | HEIGHT |
|-------|-----------|---------|--------|
| 1     | 12756.3   | 169.004 | 5.1    |
| 2     | 12683.5   | 164.039 | 3.4    |
| 3     | 12005.9   | 154.037 | 5.6    |
| 4     | 10355.6   | 137.177 | 5.8    |
| 5     | 10181.5   | 134.870 | 2.7    |
| 6     | 9882.9    | 130.915 | 5.0    |
| 7     | 9780.7    | 129.560 | 13.3   |
| 8     | 9617.0    | 127.392 | 4.2    |
| 9     | 9564.4    | 124.046 | 9.5    |
| 10    | 9260.4    | 122.689 | 4.9    |
| 11    | 9131.6    | 120.982 | 8.8    |
| 12    | 8941.4    | 118.443 | 8.1    |
| 13    | 8625.2    | 114.254 | 18.9   |
| 14    | 8255.9    | 109.362 | 0.7    |
| 15    | 5844.9    | 77.425  | 12.8   |
| 16    | 5812.8    | 77.000  | 13.6   |
| 17    | 5780.8    | 76.575  | 13.5   |
| 18    | 4436.8    | 58.772  | 8.7    |
| 19    | 4167.5    | 55.205  | 9.4    |
| 20    | 3973.5    | 52.635  | 8.5    |
| 21    | 3421.7    | 45.926  | 8.1    |
| 22    | 1145.6    | 15.176  | 8.1    |

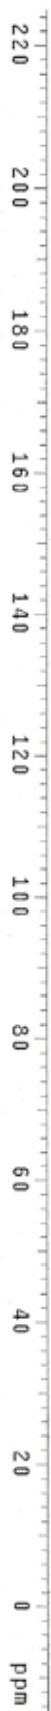

2-OMe-Cyclized  
Marchello

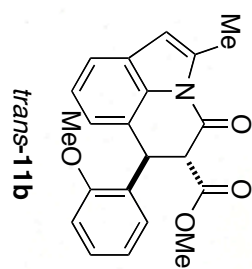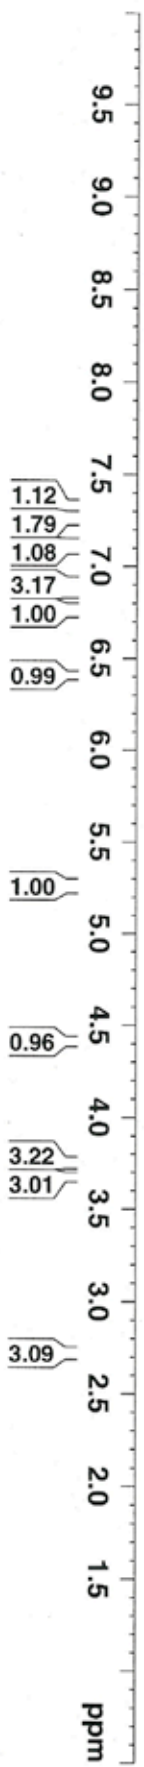

2-OMe  
Marchello

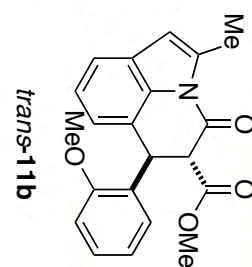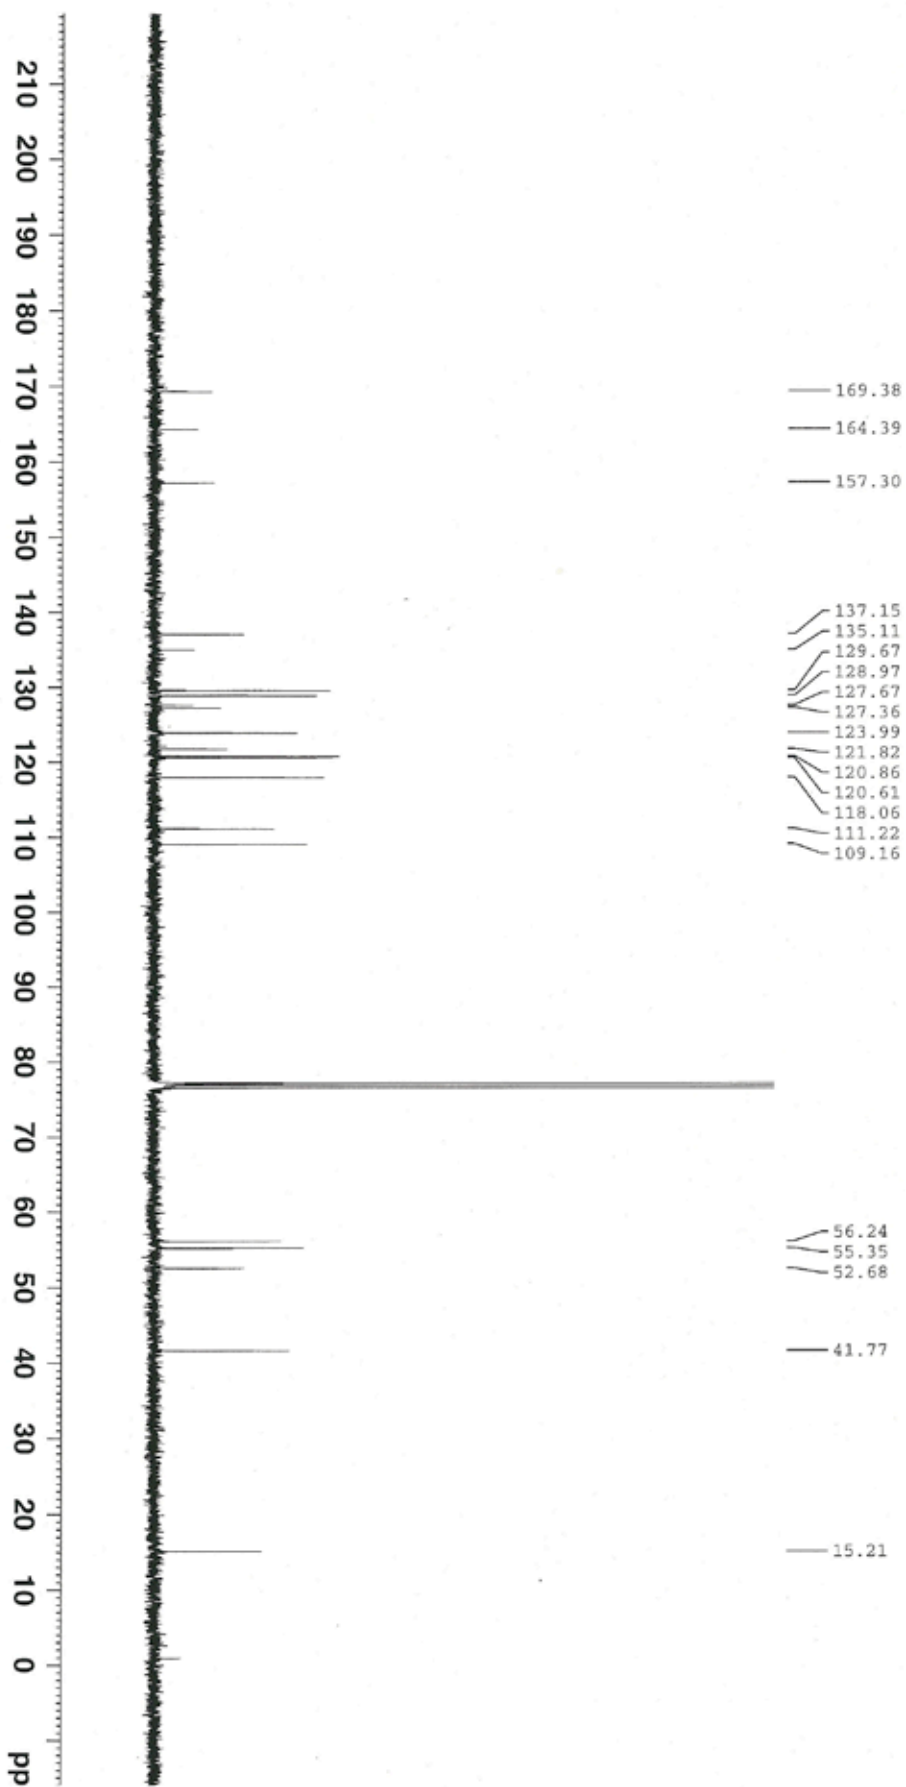

2-methoxy benzaldehyde derived !!

Sample: NB-1-PG-20-D-crude  
File: xp

Pulse Sequence: s2pu1

Solvent: cdcl3  
Ambient temperature  
Operator: jpkxfl  
Mercury-300 "1,2d2"

Relax. delay 1.000 sec  
Pulse 30.0 degrees  
Acq. time 3.550 sec  
Width 4803.1 Hz  
48 repetitions  
OBSERVE H1, 300.2185210 MHz  
DATA PROCESSING  
FT size 65536  
Total time 15 hr, 51 min, 3 sec

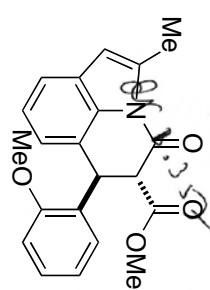

11b (crude)

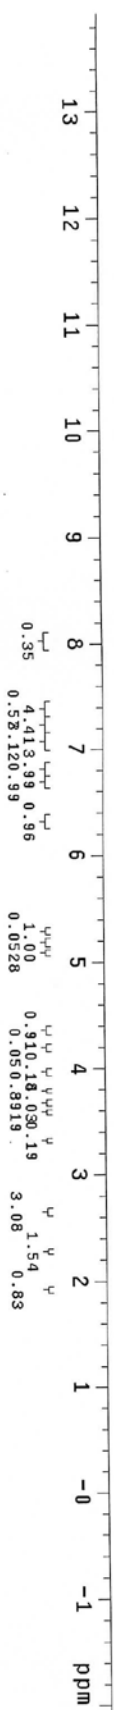

4-nitrophenyl cyc1n  
Sample: N8-5-DVP-140-T1-H  
File: xp  
Pulse Sequence: zgpg30  
Solvent: cdcl3  
Acq. time: 3.550 sec  
Width: 4803.1 Hz  
15 repetitions  
OBSERVE: H1, 300.2185002 MHz  
DATA PROCESSING  
FT size: 65536  
Total time: 1 min, 16 sec

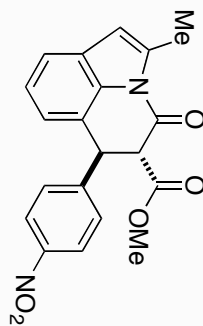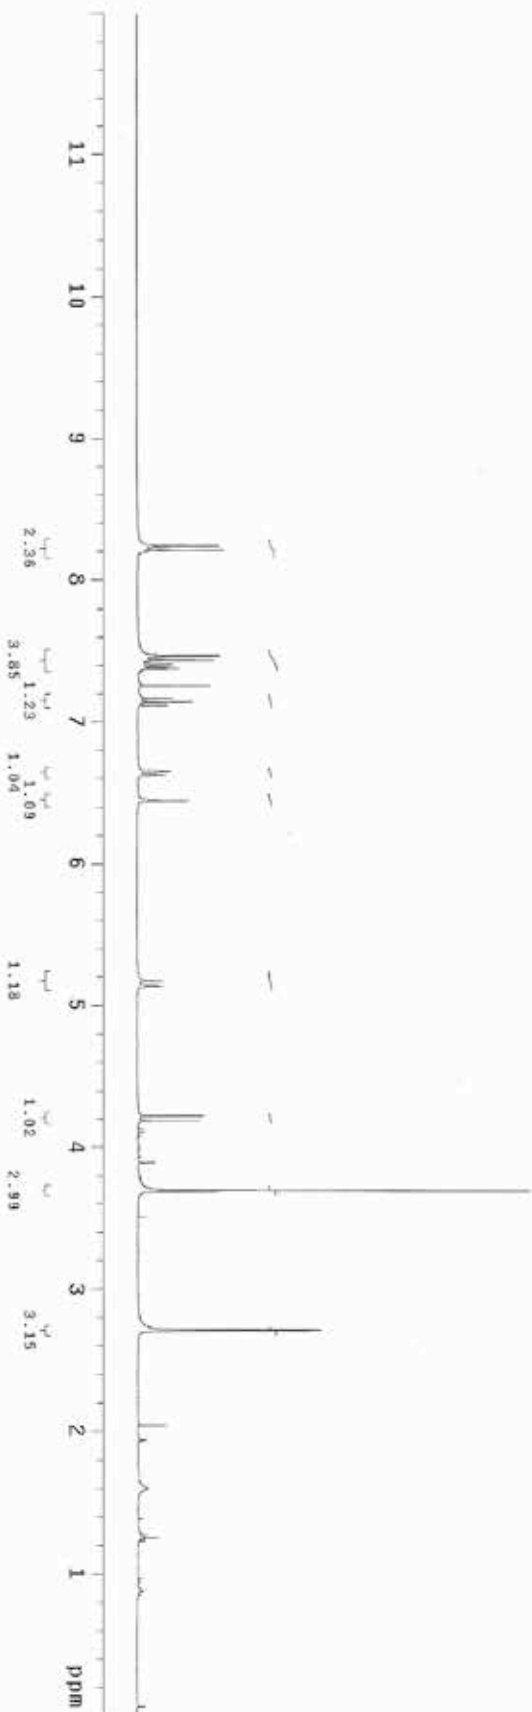

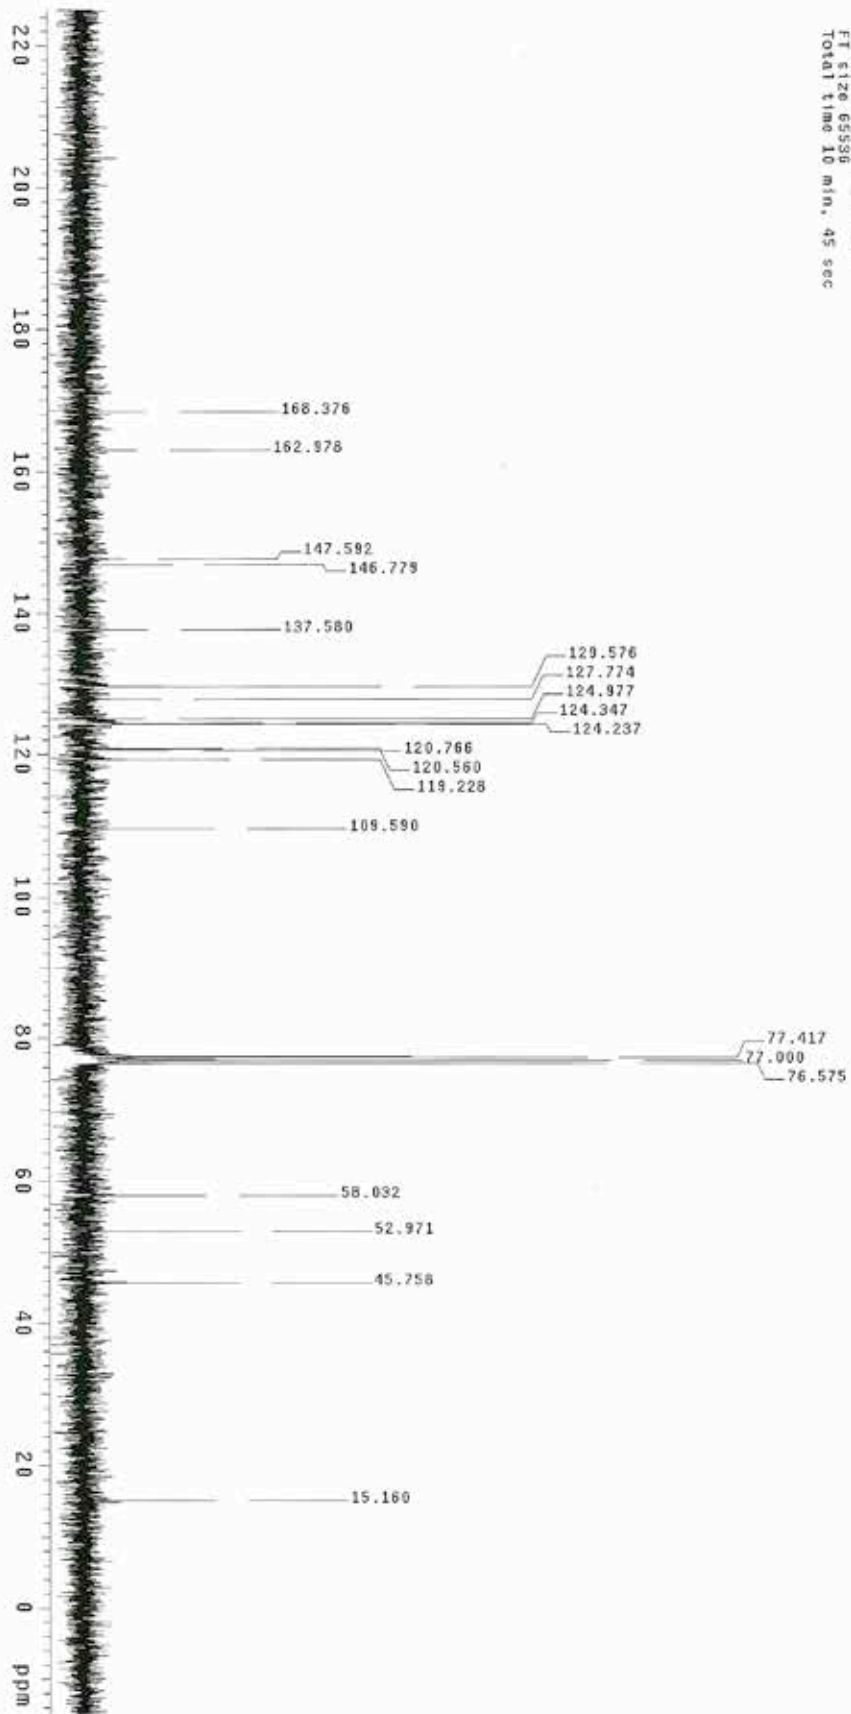

Std Carbon experiment  
Sample: NB-5-0VP-140-T1-H  
File: xp  
Pulse Sequence: s2p01  
Solvent: cdcl3  
Ambient temperature  
Operator: dpat11  
Mercury-300 "r2d2"  
Relax. delay 1.000 sec  
Pulse 20.0 degrees  
Acq. time 1.301 sec  
Width 18115.9 Hz  
224 repetitions  
OBSERVE G13, 75.4900037 MHz  
DECOUPLE H1, 300.2199481 MHz  
Power 40 db  
continuously on  
WALTZ-16 modulated  
DATA PROCESSING  
Line broadening 0.5 Hz  
FI size 65536  
Total time 10 min, 45 sec

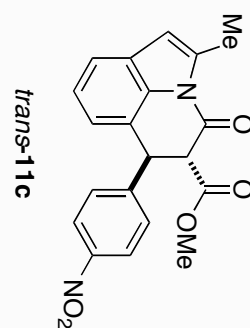

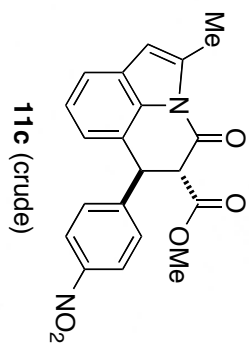

4-nitro, no mol slaves  
Sample: NB-1-PG-20-A-crude  
File: xp  
Pulse Sequence: s2pu1  
Solvent: cdcl3  
Ambient temperature  
Operator: dpatt1  
Mercury-300 "fzdd2"  
Relax. delay 1.000 sec  
Pulse 30.0 degrees  
Acq. time 3.550 sec  
Width 4803.1 Hz  
54 repetitions  
OBSERVE H1, 300.2185002 MHz  
DATA PROCESSING  
FT size 65536  
Total time 15 hr, 51 min, 3 sec

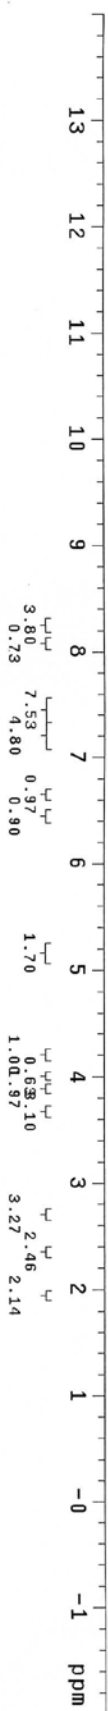

Std Proton parameters  
Sample: NB-6-DVP-2-A-71-H  
File: xp  
Pulse Sequence: s2pul  
Solvent: cdcl3  
Ambient temperature  
Operator: dant11  
Mercury-300 "r2q2"  
Relax. delay 1.000 sec  
Pulse 30.0 degrees  
Acq. time 3.550 sec  
Width 4803.1 Hz  
28 repetitions  
OBSERVE H1, 300.2185051 MHz  
DATA PROCESSING  
F1 size 85536  
Total time 15 hr, 51 min, 3 sec

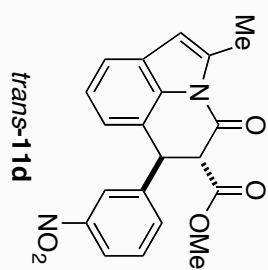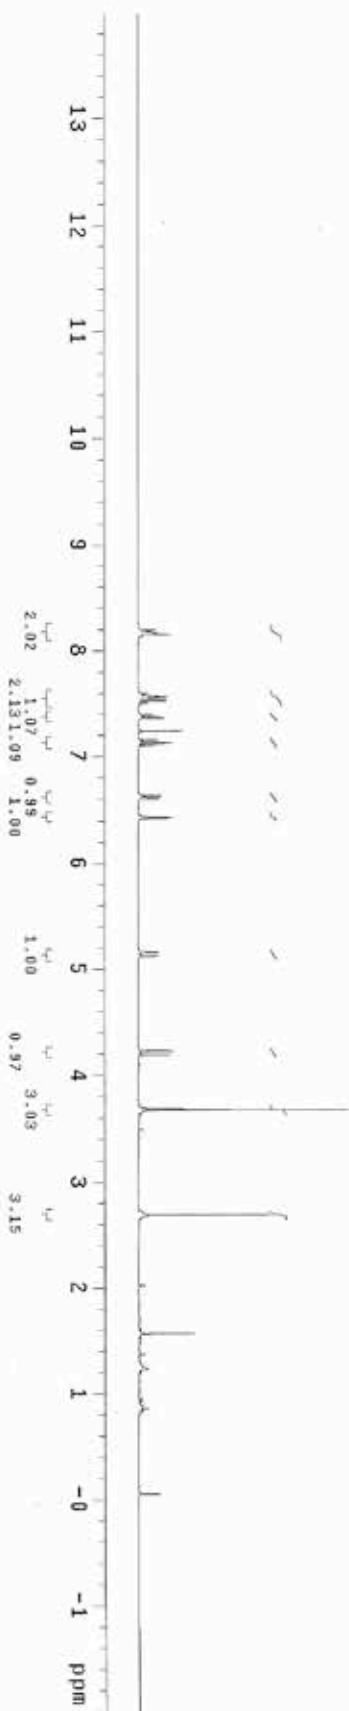



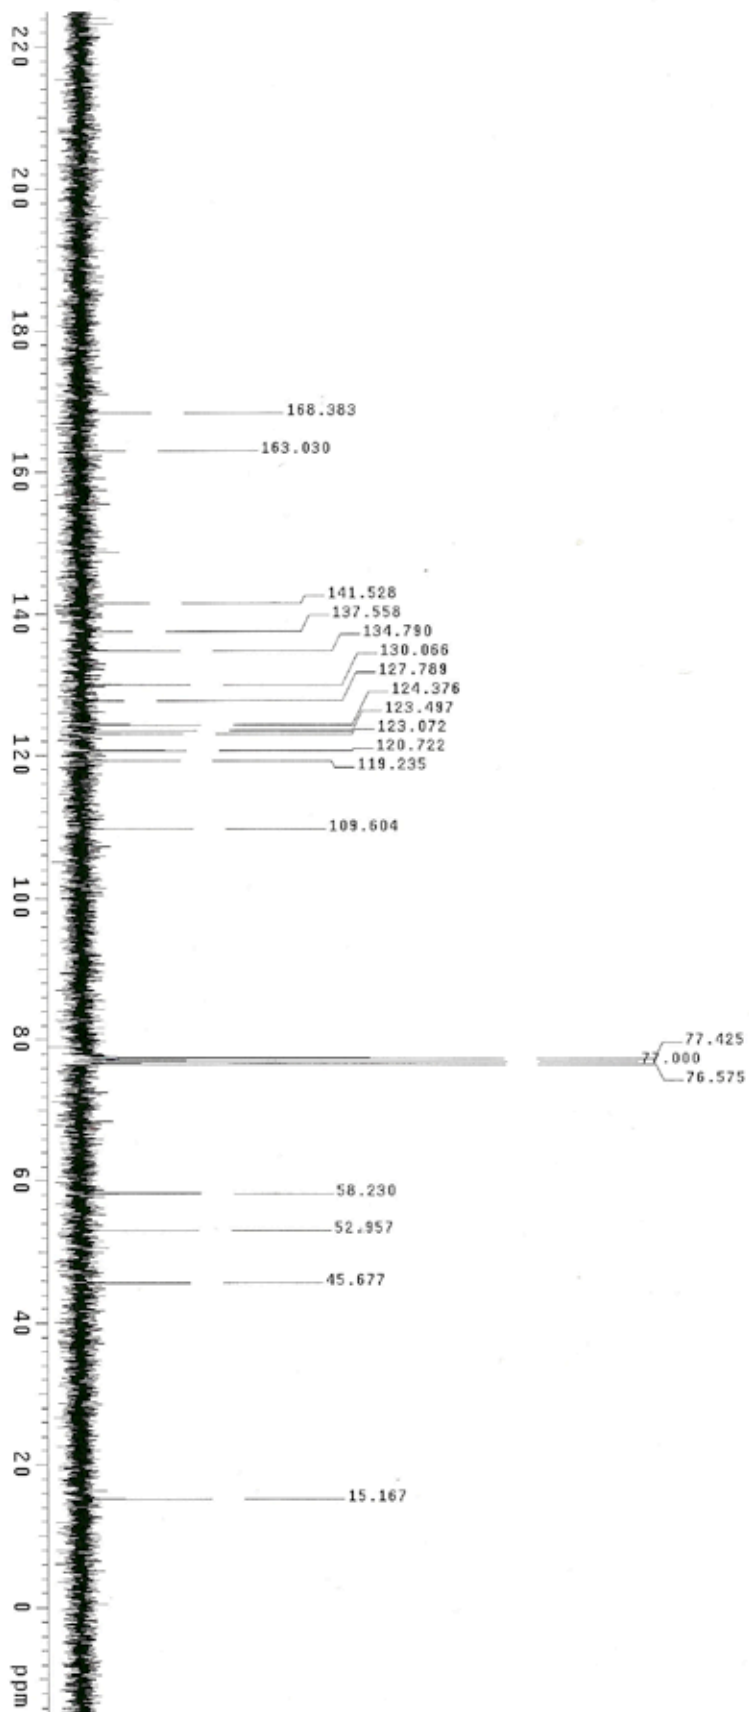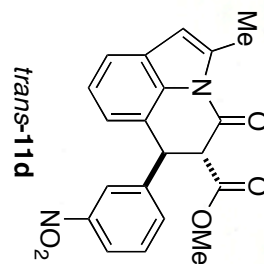

Std Carbon experiment  
Sample: NB-6-DVP-2-A-T1-C  
File: xp  
Pulse Sequence: s2pul1  
Solvent: cdcl3  
Ambient: temperature  
Operator: gmpat1  
Mercury: 300 "r2d2"  
Relax. delay 1.000 sec  
Pulse 30.0 degrees  
Acq. time 1.301 sec  
Width 18115.9 Hz  
96 repetitions  
OBSERVE C13, 75.490037 MHz  
DECOUPLE H1, 300.2199481 MHz  
Power 40 dB  
continuously on  
WALTZ-16 modulated  
DATA PROCESSING  
Line broadening 0.5 Hz  
FI size 65536  
Total time 10 hr, 41 min, 3 sec

3-NO<sub>2</sub> benzaldehyde derived II

Std Proton parameters  
Sample: NB-6-DVP-2-A-HHH  
File: xp  
Pulse Sequence: s2pul1  
Solvent: cdcl3  
Temp: 40.0 C / 313.1 K  
Operator: dpaf11  
Mercury-300 "r2d2"  
Relax. delay: 1.000 sec  
Pulse: 30.0 degrees  
Acq. time: 3.350 sec  
Width: 4809.1 Hz  
40 repetitions  
OBSERVE: F1: 300.2185051 MHz  
DATA PROCESSING  
F1 size: 65536  
Total time 15 hr, 51 min, 3 sec

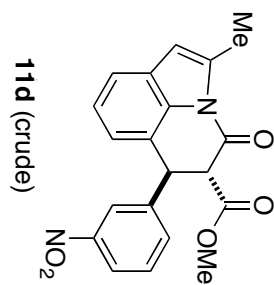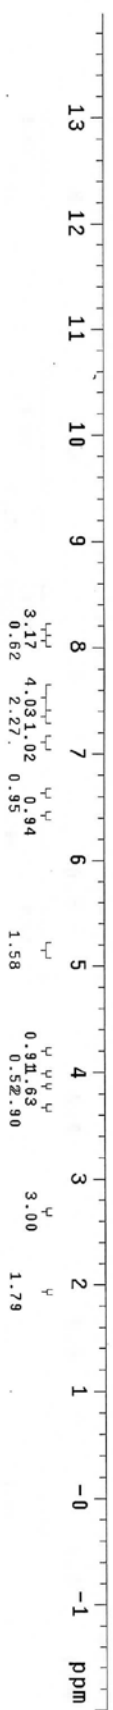

Std Proton parameters  
Sample: NB-6-DVP-1-B-T1-H  
File: xp  
Pulse Sequence: s2pu1  
Solvent: cdcl3  
Acquisition temperature  
Operator: dpa11  
Mercury-300 "F202"  
Relax. delay 1.000 sec  
Pulse 30.0 degrees  
Acq. time 3.550 sec  
Width 4803.1 Hz  
28 repetitions  
OBSERVE H1, 300.2185002 MHz  
DATA PROCESSING  
F1 size 65536  
Total time 15 hr, 51 min, 3 sec

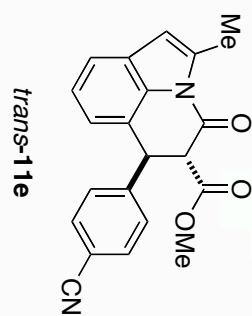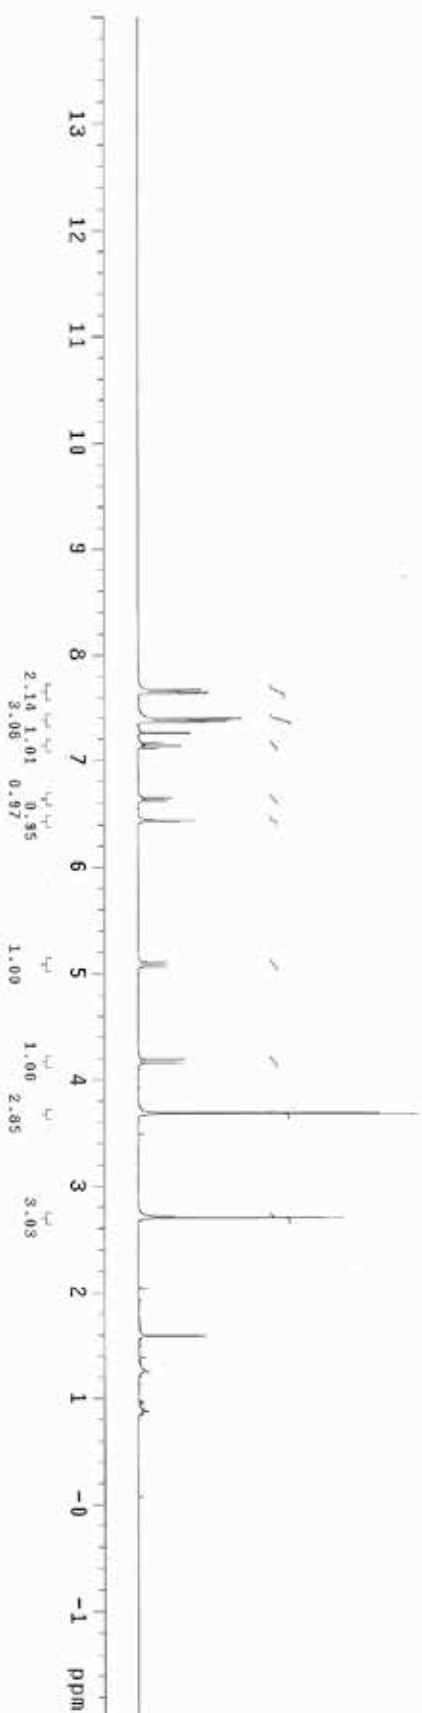

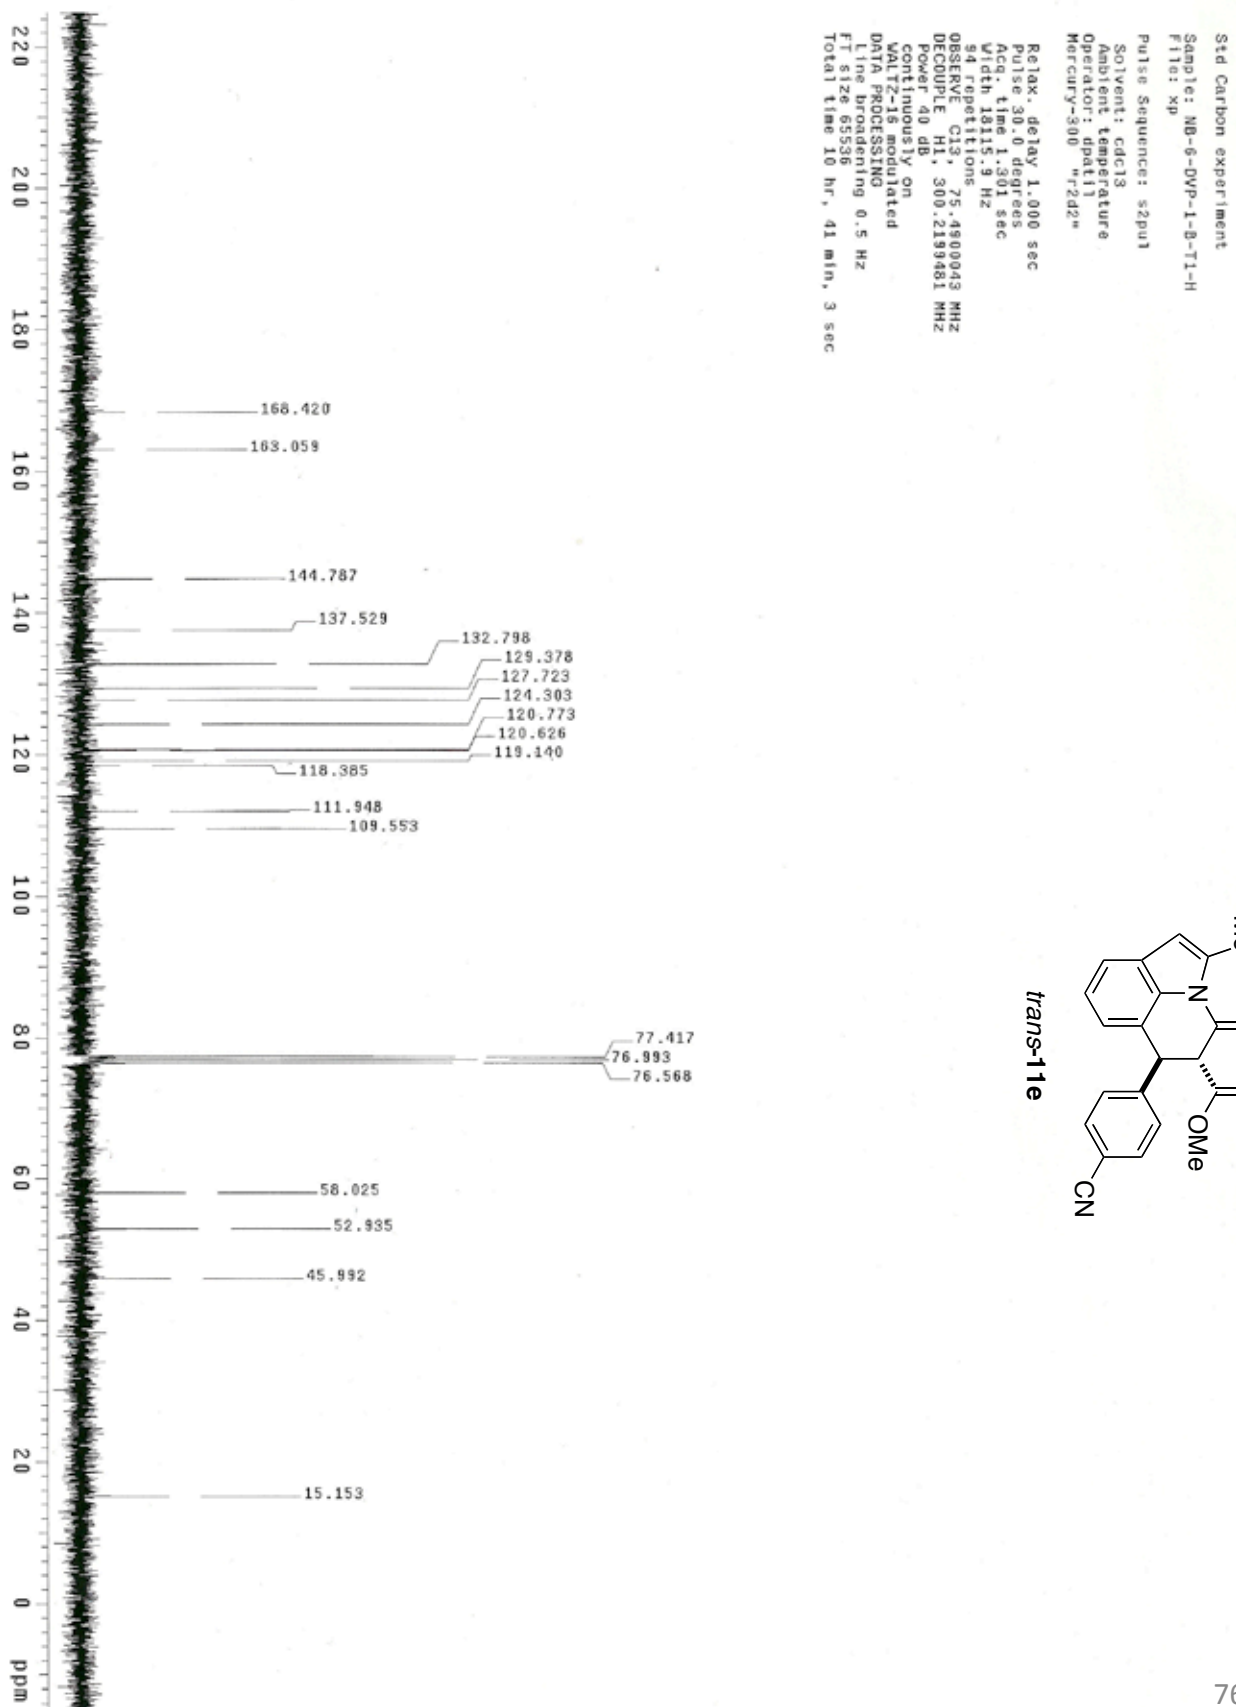

4-CN benzaldehyde derivat 11

new proton  
Sample: NB-6-DVP-1-B-HHH  
File: xp  
Pulse Sequence: s2pu1  
Solvent: cdcl3  
Temp: 21.0 C / 294.1 K  
Operator: dpat11  
Mercury-300 "r2d2"  
Relax. delay 1.000 sec  
Pulse 30.0 degrees  
Acq. time 3.550 sec  
Width 4803.1 Hz  
80 repetitions  
OBSERVE H1 300.2185002 MHz  
DATA PROCESSING  
F1 size 65536  
Total time 1 hr, 18 min, 43 sec

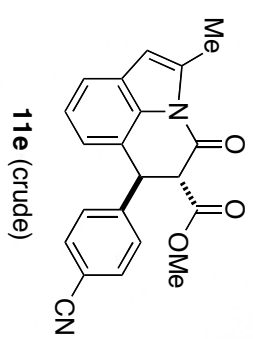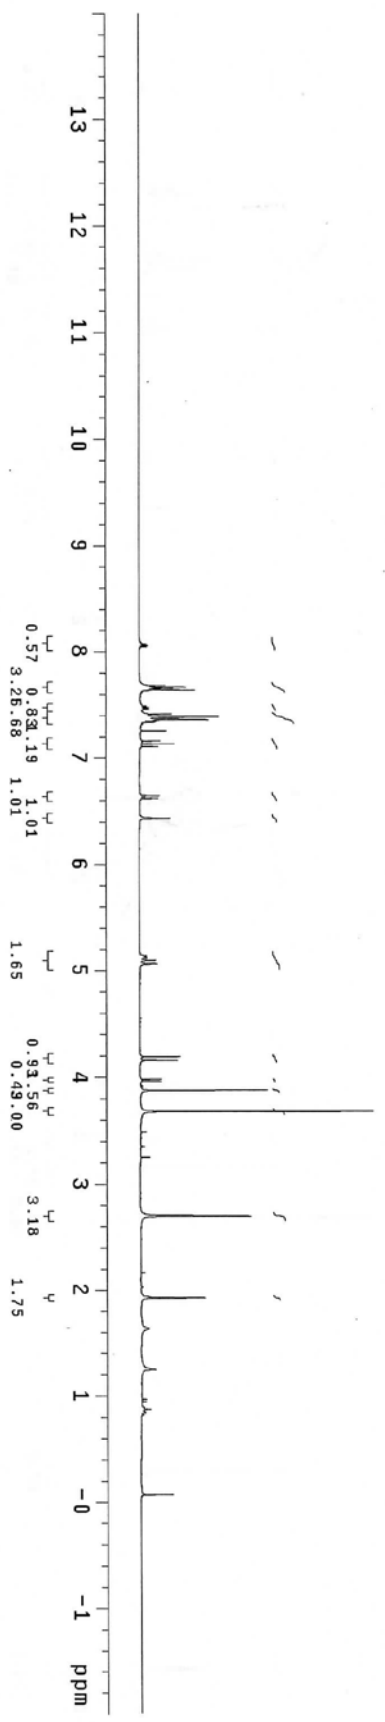

111-MAC-2-H-T3  
File: xp  
Pulse Sequence: zgpg30  
Solvent: cdcl3  
Ambient Temperature  
Operator: cav11c  
Mercury-300 "1282"  
Relax. delay: 1.000 sec  
Pulse: 30.0 degrees  
Acq. time: 3.550 sec  
Width: 4803.1 Hz  
SI repetitions  
OBSERVE: H1, 300.2184989 MHz  
DATA PROCESSING  
FI size: 65536  
Total time: 9 min, 34 sec

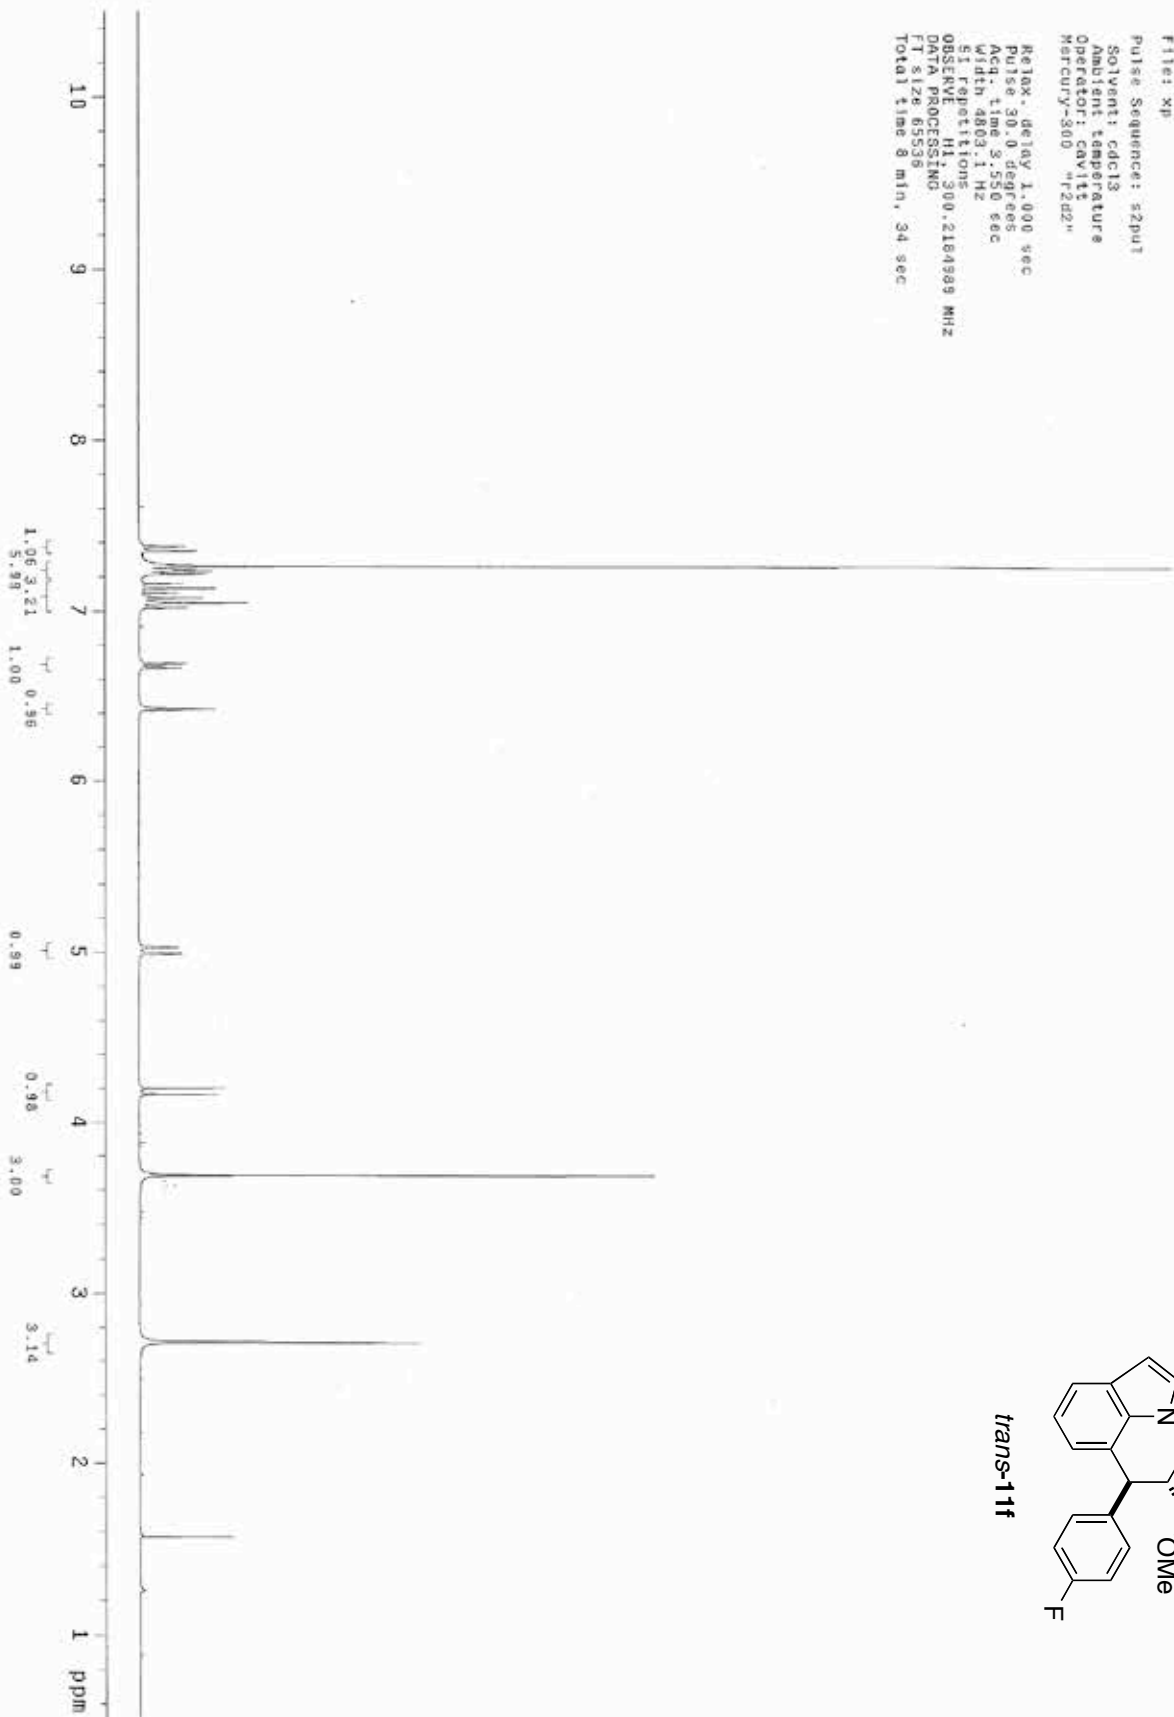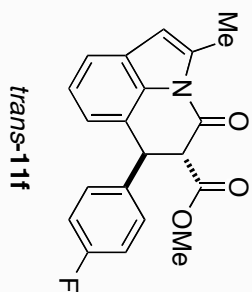

III-MOC-2-C-11  
 File: xp  
 Pulse Sequence: s2pul1  
 Solvent: cdcl3  
 Ambient temperature  
 Operator: cavill  
 Mercury-300 "r2d2"  
 Relax. delay 1.000 sec  
 Pulse 30.0 degrees  
 Acq. time 1.301 sec  
 Width 18115.8 Hz  
 282 repetitions  
 OBSERVE C13, 75.490032 MHz  
 DECOUPLE H1, 300.219481 MHz  
 Power 40 dB  
 continuously on  
 WALTZ-16 modulated  
 DATA PROCESSING  
 Line broadening 0.5 Hz  
 FT size 65536  
 Total time 85 hr, 48 min, 5 sec

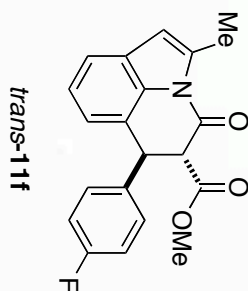

| INDEX | FREQUENCY | PPM     | HEIGHT |
|-------|-----------|---------|--------|
| 1     | 12744.4   | 168.822 | 11.1   |
| 2     | 12359.0   | 183.717 | 6.8    |
| 3     | 10367.6   | 137.336 | 11.9   |
| 4     | 10180.2   | 134.855 | 8.1    |
| 5     | 9830.8    | 130.227 | 23.7   |
| 6     | 9822.5    | 130.117 | 24.6   |
| 7     | 9627.4    | 127.532 | 9.9    |
| 8     | 9372.5    | 124.156 | 22.9   |
| 9     | 9213.0    | 122.054 | 7.4    |
| 10    | 9125.9    | 120.889 | 20.3   |
| 11    | 8962.3    | 118.722 | 20.7   |
| 12    | 8761.1    | 116.056 | 21.6   |
| 13    | 8739.5    | 115.770 | 22.8   |
| 14    | 8262.4    | 109.450 | 22.1   |
| 15    | 5041.7    | 77.424  | 82.6   |
| 16    | 5029.2    | 77.204  | 23.5   |
| 17    | 5812.7    | 76.939  | 84.8   |
| 18    | 5780.6    | 76.575  | 84.3   |
| 19    | 4430.5    | 58.690  | 14.2   |
| 20    | 3981.6    | 52.741  | 23.5   |
| 21    | 3426.0    | 45.364  | 18.5   |
| 22    | 1147.1    | 15.166  | 21.5   |

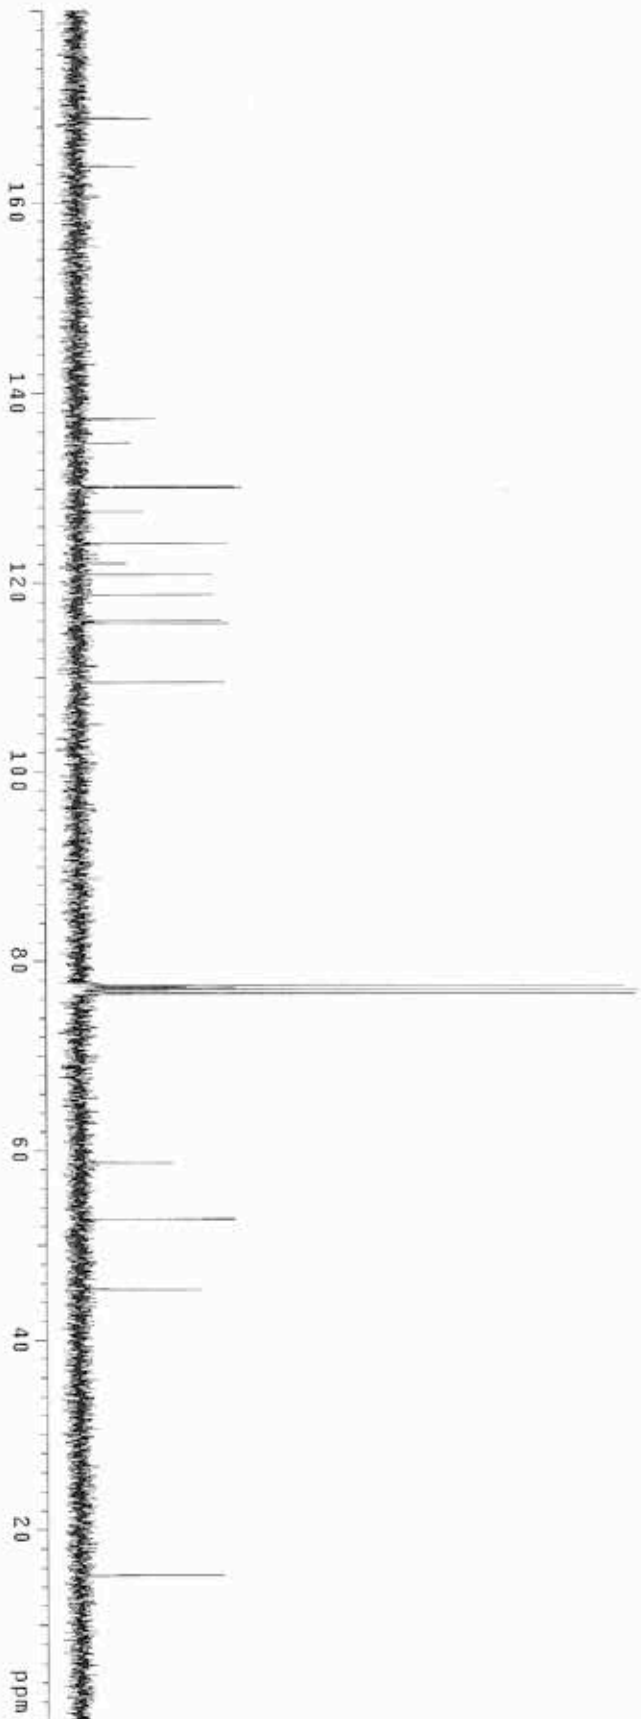





STD Proton parameters  
Sample: N8-6-DVP-1-A-71-H  
File: xp  
Pulse Sequence: s2p01  
Solvent: CDCl3  
Ambient temperature  
Operator: opad11  
Mercury-300 "7202"  
Relax. delay 1.000 sec  
Pulse 30.0 degrees  
Acq. time 3.550 sec  
Width 4803.1 Hz  
42 repetitions  
OBSERVE H1, 300.2185002 MHz  
DATA PROCESSING  
FT size 65536  
Total time 15 hr, 51 min, 3 sec

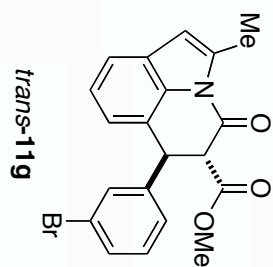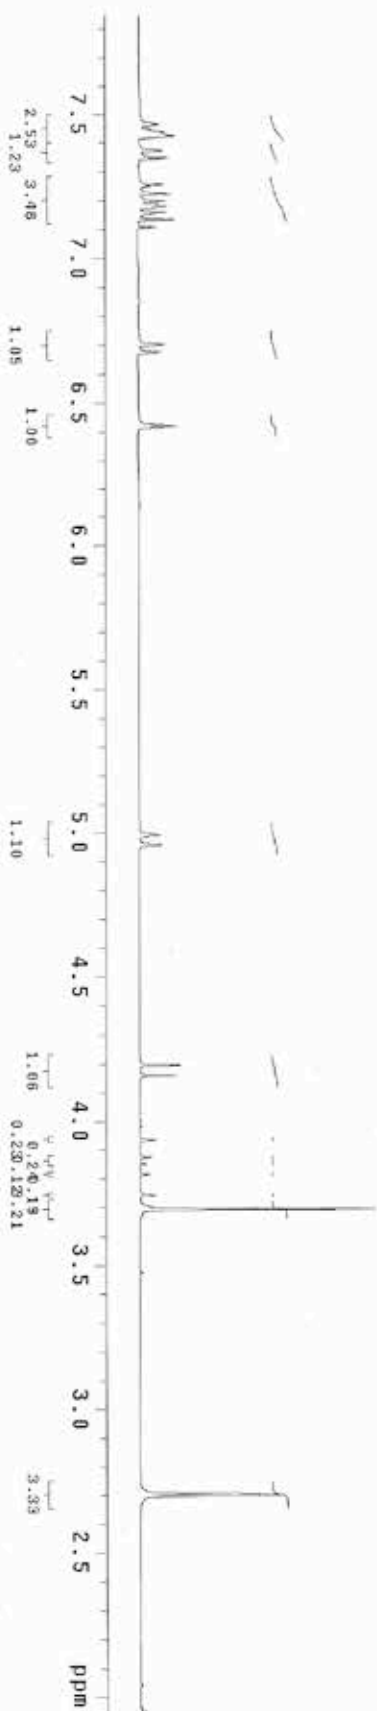

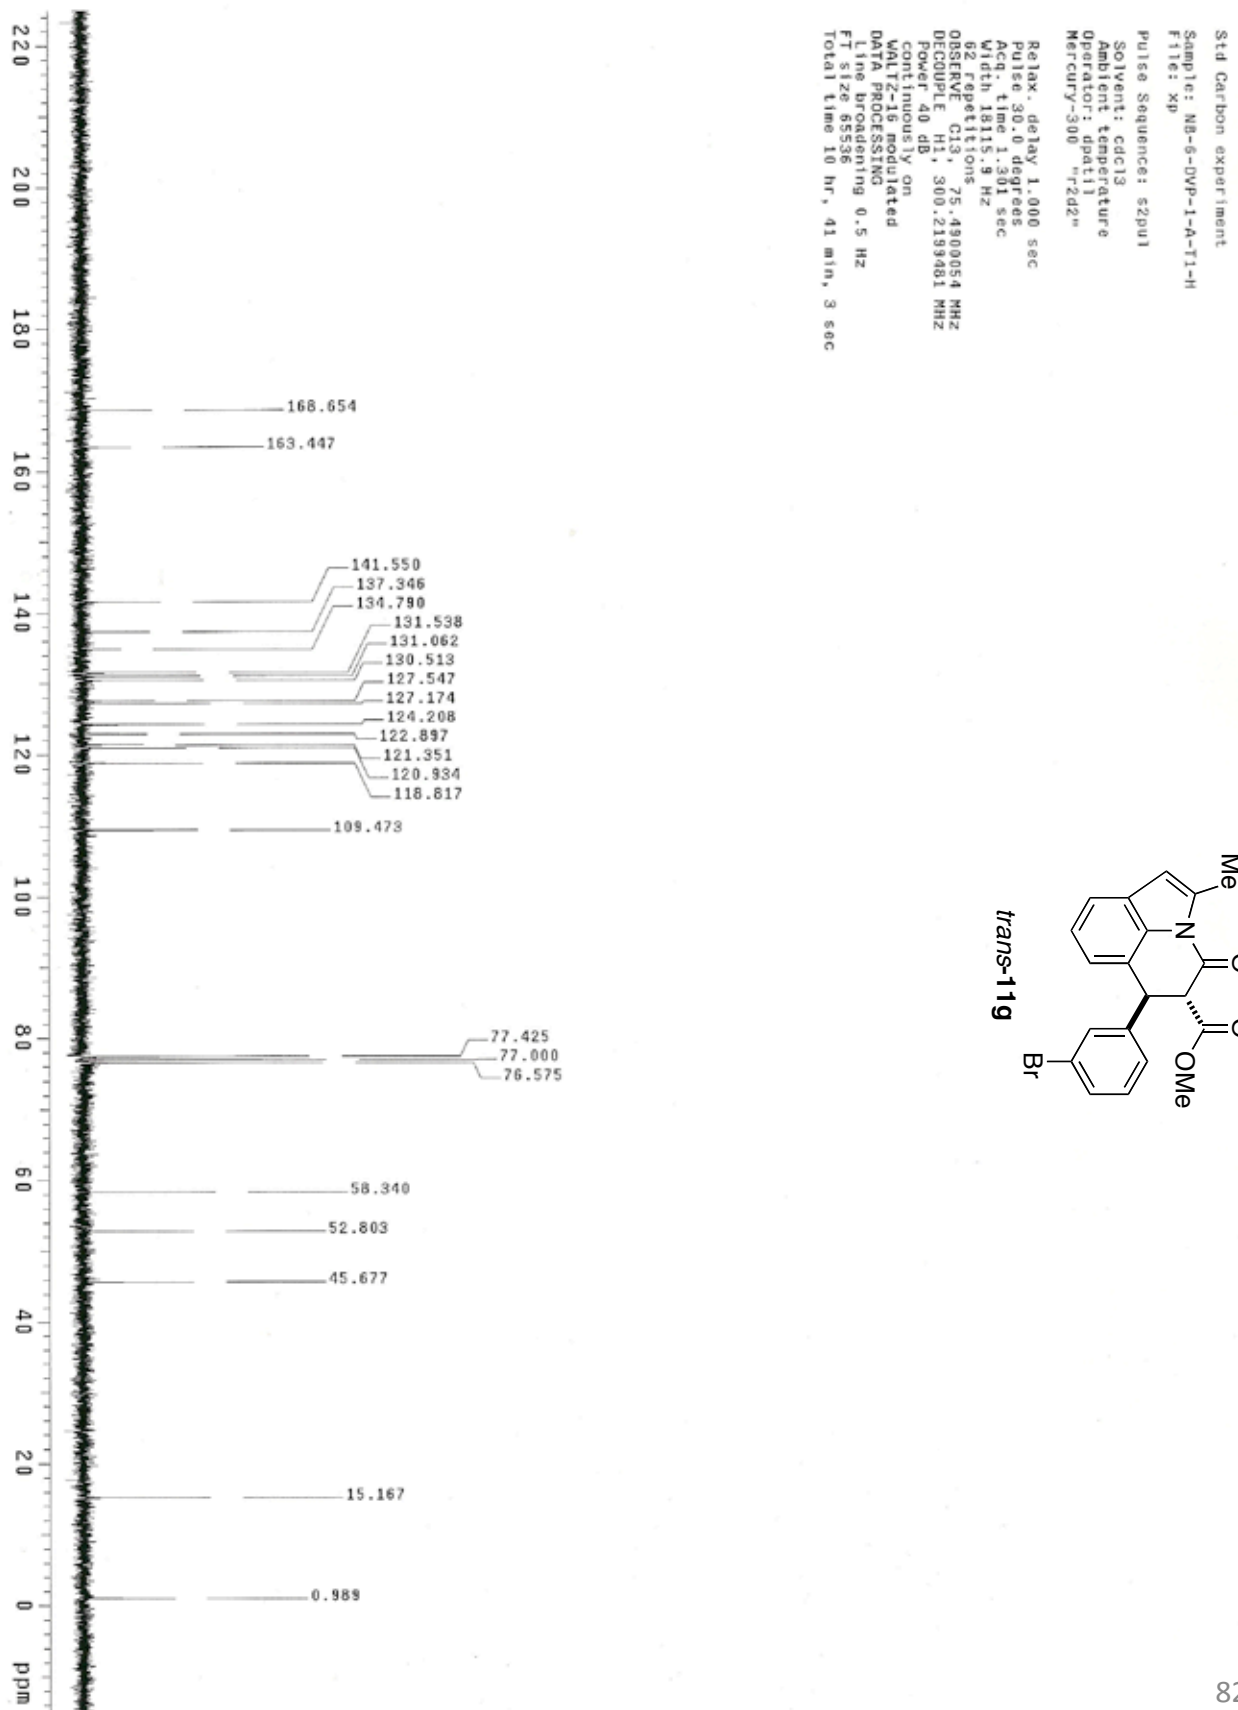

3-bromobenzaldehyde derived !!

new proton  
Sample: NB-6-DVP-1-A-HHH  
File: xp  
Pulse Sequence: s2pu1  
Solvent: cdcl3  
Temp: 40.0 C / 313.1 K  
Operator: dpat11  
Mercury-300 "r2d2"

Relax: delay 1.000 sec  
Pulse: 30.0 degrees  
Acq: time 3.350 sec  
Width: 4803.1 Hz  
Spectrum: 00.2185002 MHz  
OBSERVED F1  
DATA PROCESSING  
File size: 5536  
Total time 1 hr, 35 min, 6 sec

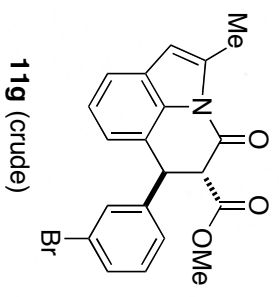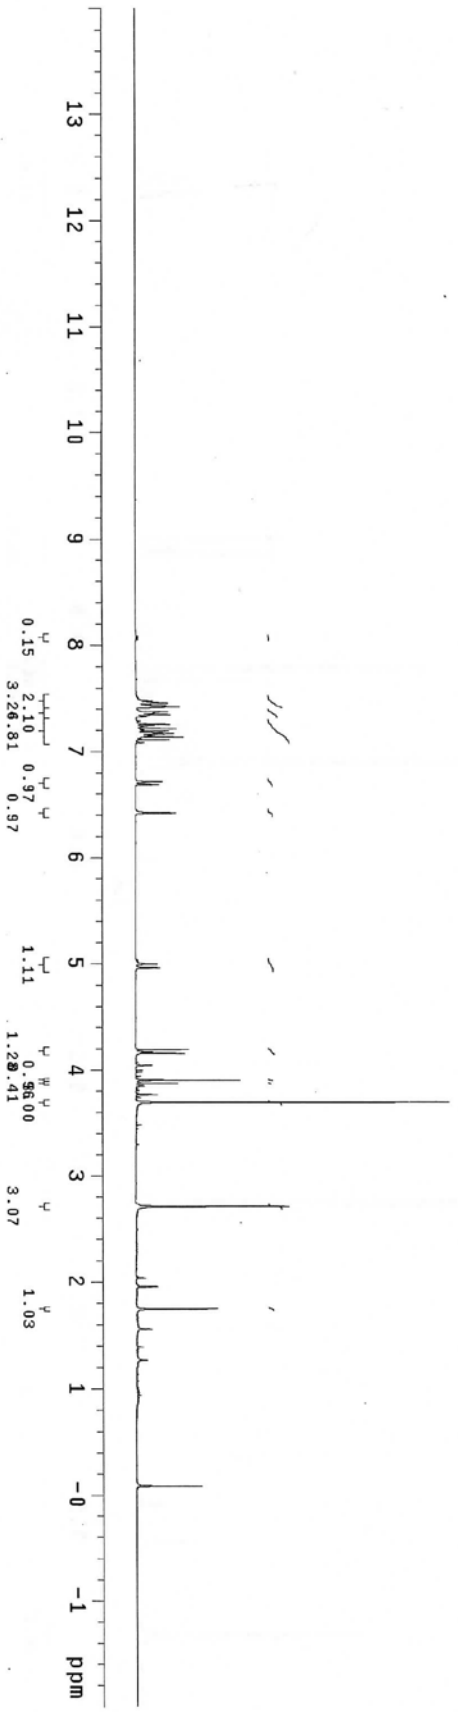

Std Proton parameters  
Sample: NB-6-OVP-2-8-T1-H  
File: xp  
Pulse sequence: zgpg30  
Solvent: cdcl3  
Temp: 21.9 C / 294.1 K  
Operator: opat111  
Nuc1: 13C  
Nuc2: 1H  
Relax. delay: 1.000 sec  
Pulse: 30.0 degrees  
Acq. time: 3.550 sec  
Width: 4803.1 Hz  
28 repetitions  
OBSERVE: H1, 300.2185002 MHz  
DATA PROCESSING  
FT size: 65536  
Total time: 15 hr, 51 min, 3 sec

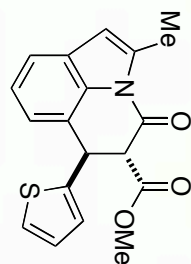

*trans*-11h

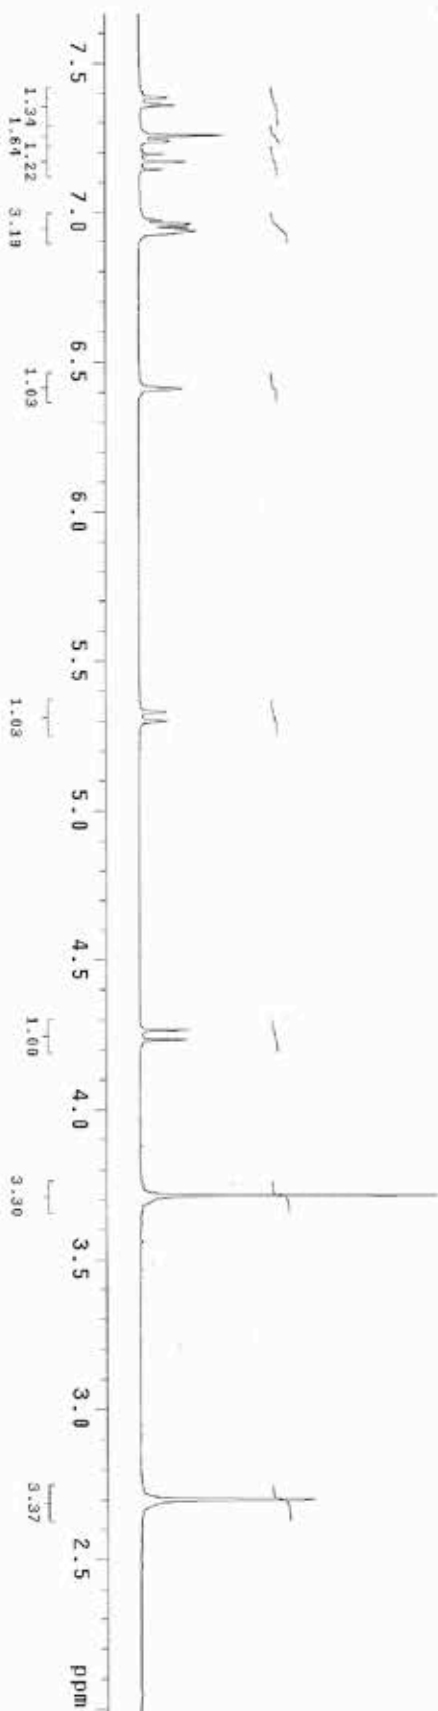

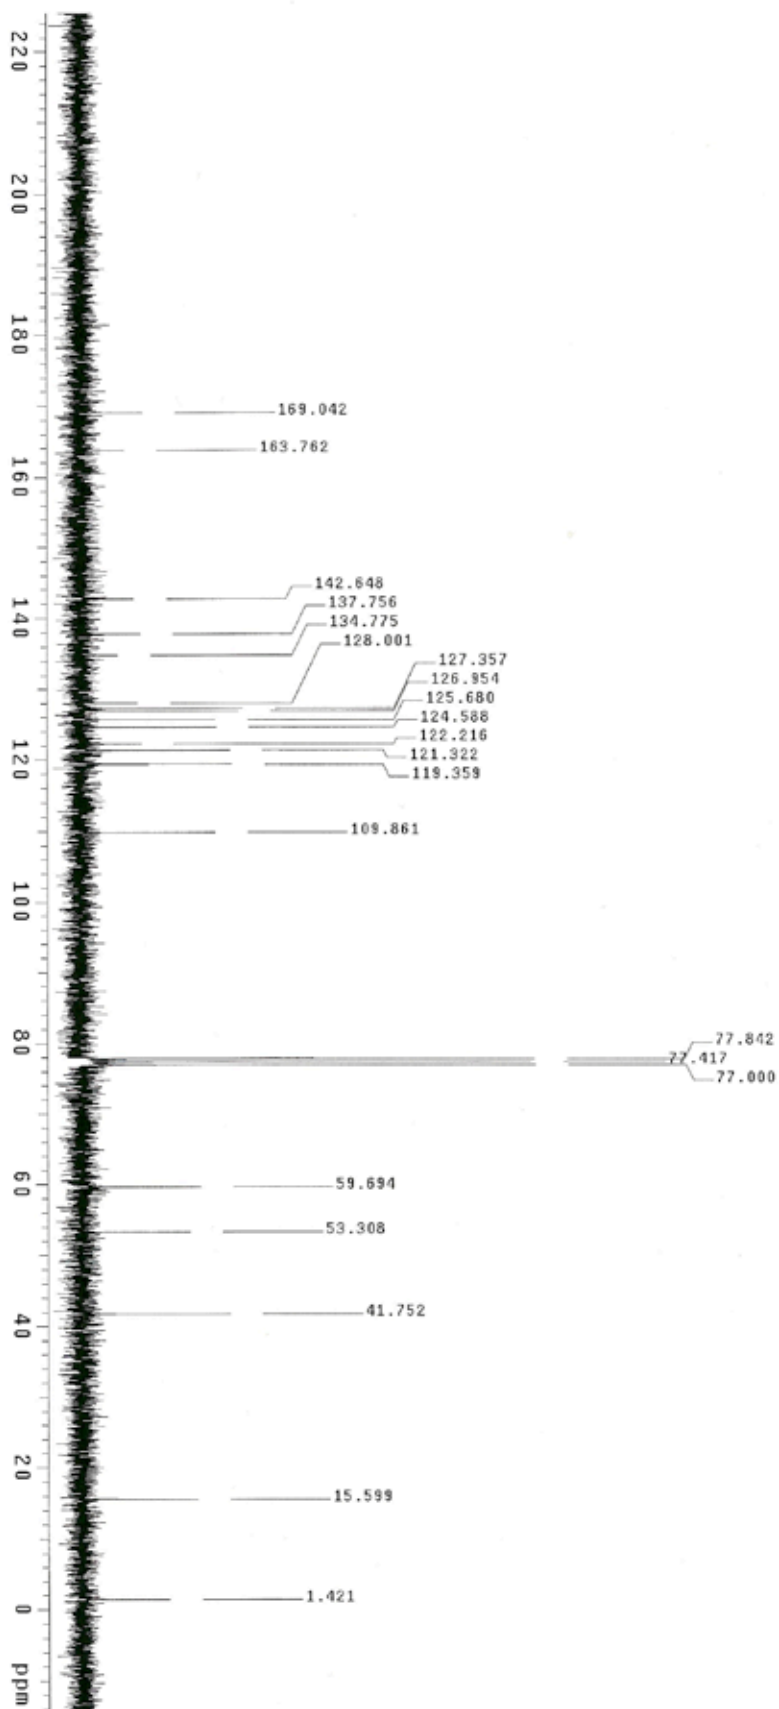

Std Carbon experiment  
Sample: N8-6-DVP-2-B-T1-H  
File: xp  
Pulse Sequence: szpul1  
Solvent: cdc13  
Temp: 21.0 C / 294.1 K  
Operator: jpat11  
Mercury-300 "1282"  
Relax. delay 1.000 sec  
Pulse 30.0 degrees  
Acq. time 1.301 sec  
Width 18115.9 Hz  
156 repetitions  
OBSERVE C13, 75.4898717 MHz  
DECUPLE H1, 300.2199481 MHz  
Power 40 dB  
continuously on  
WALTZ-16 modulated  
DATA PROCESSING  
Line broadening 0.5 Hz  
FI size 63536  
Total time 10 hr, 41 min, 3 sec

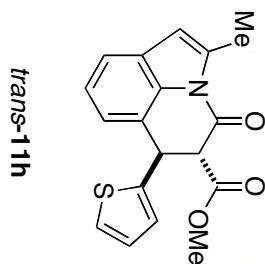

Std Proton parameters  
Sample: NB-6-DVP-10-B-H  
File: xp  
Pulse Sequence: s2pul1  
Solvent: cdcl3  
Ambient temperature  
Operator: s0pat13  
Nucleus: 13C  
Relax. delay: 1.000 sec  
Pulse: 30.0 degrees  
Acq. time: 3.550 sec  
Width: 4803.1 Hz  
66 repetitions  
OBSERVE: H1, 300.2185002 MHz  
DATA PROCESSING  
F1 size: 65536  
Total time: 15 hr, 51 min, 3 sec

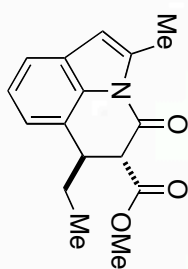

111  
25:1 *trans:cis* diastereomeric mixture

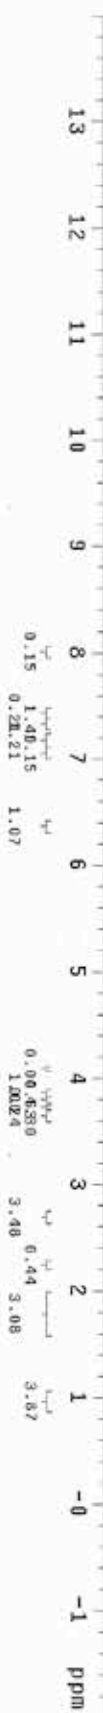

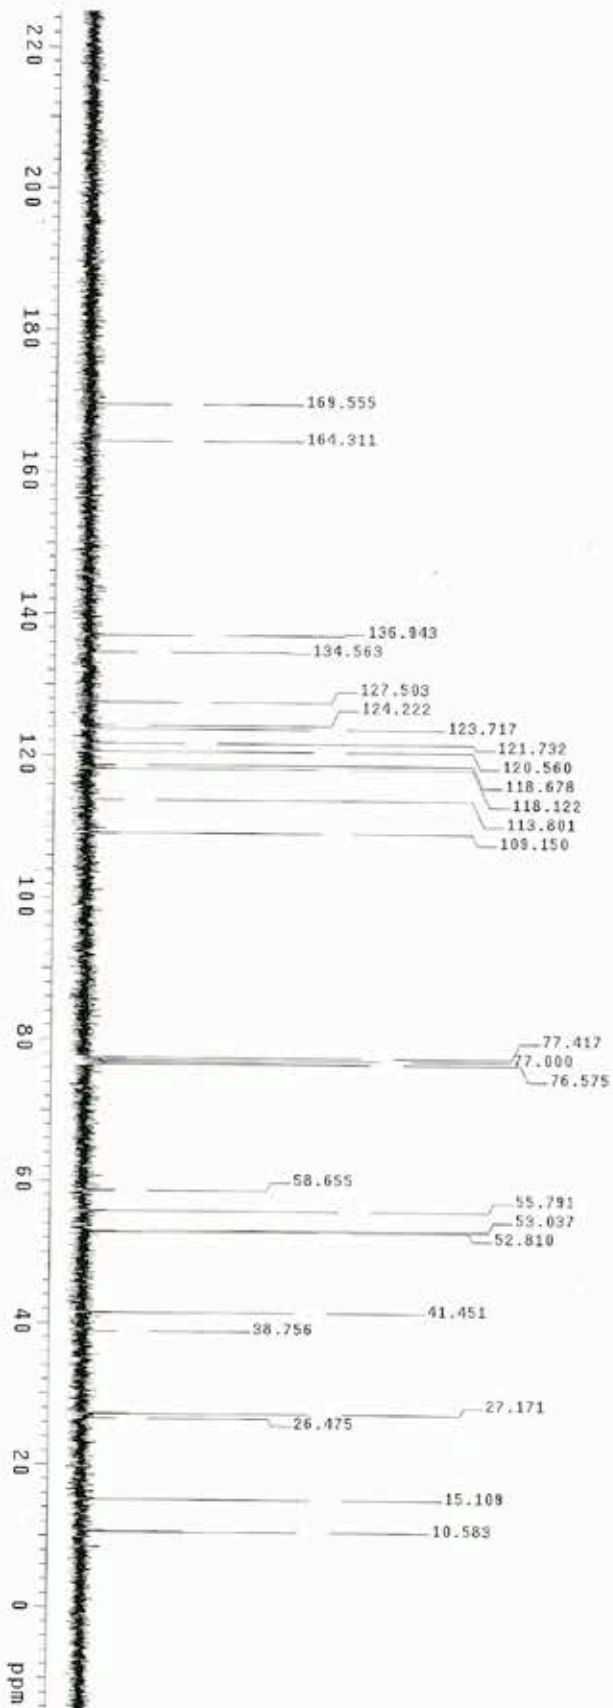

Std Carbon experiment  
Sample: NS-6-DVP-10-B-H  
File: xp  
Pulse Sequence: s2pu1  
Solvent: cdcl3  
Ambient temperature  
Operator: dpal1  
Mercury-300 "f2d2"  
Relax. delay 1.000 sec  
Pulse 30.0 degrees  
Acq. time 1.301 sec  
Width 18115.8 Hz  
112 repetitions  
OBSERVE C13, 75.490065 MHz  
DECUPLE H1, 300.219981 MHz  
Power 40 dB  
Continuously on  
WALTZ-16 modulated  
DATA PROCESSING  
Line broadening 0.5 Hz  
FT size 65536  
Total time 10 hr., 41 min, 3 sec

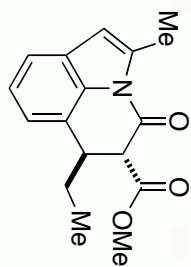

111  
25:1 *trans:cis* diastereomeric mixture

Std Proton parameters  
Sample: N8-6-DVP-3-B-H  
File: xp  
Pulse Sequence: s2pul1  
Solvent: cdcl3  
Ambient temperature  
Operator: jdpak1  
Mercury-300 "4242"  
Relax. delay 1.000 sec  
Pulse 30.0 degrees  
Acq. time 3.550 sec  
Width 4803.1 Hz  
46 repetitions  
OBSERVE H1, 300.2185902 MHz  
DATA PROCESSING  
FT size 65536  
Total time 15 hr, 51 min, 3 sec

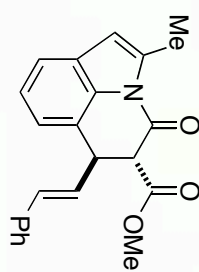

**11**  
20:1 *trans:cis* diastereomeric mixture

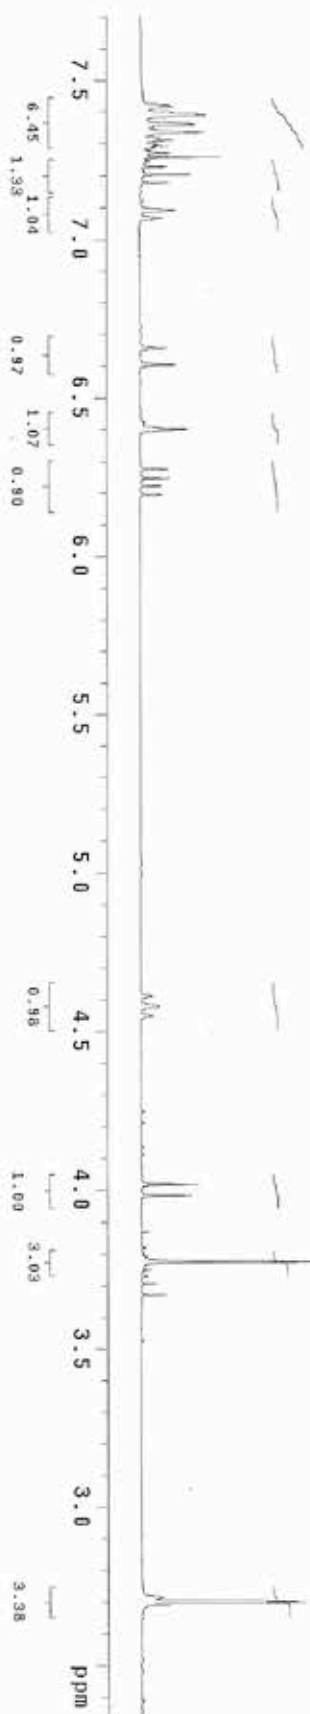



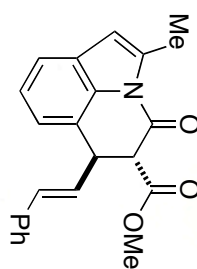

**11**  
20:1 *trans:cis* diastereomeric mixture

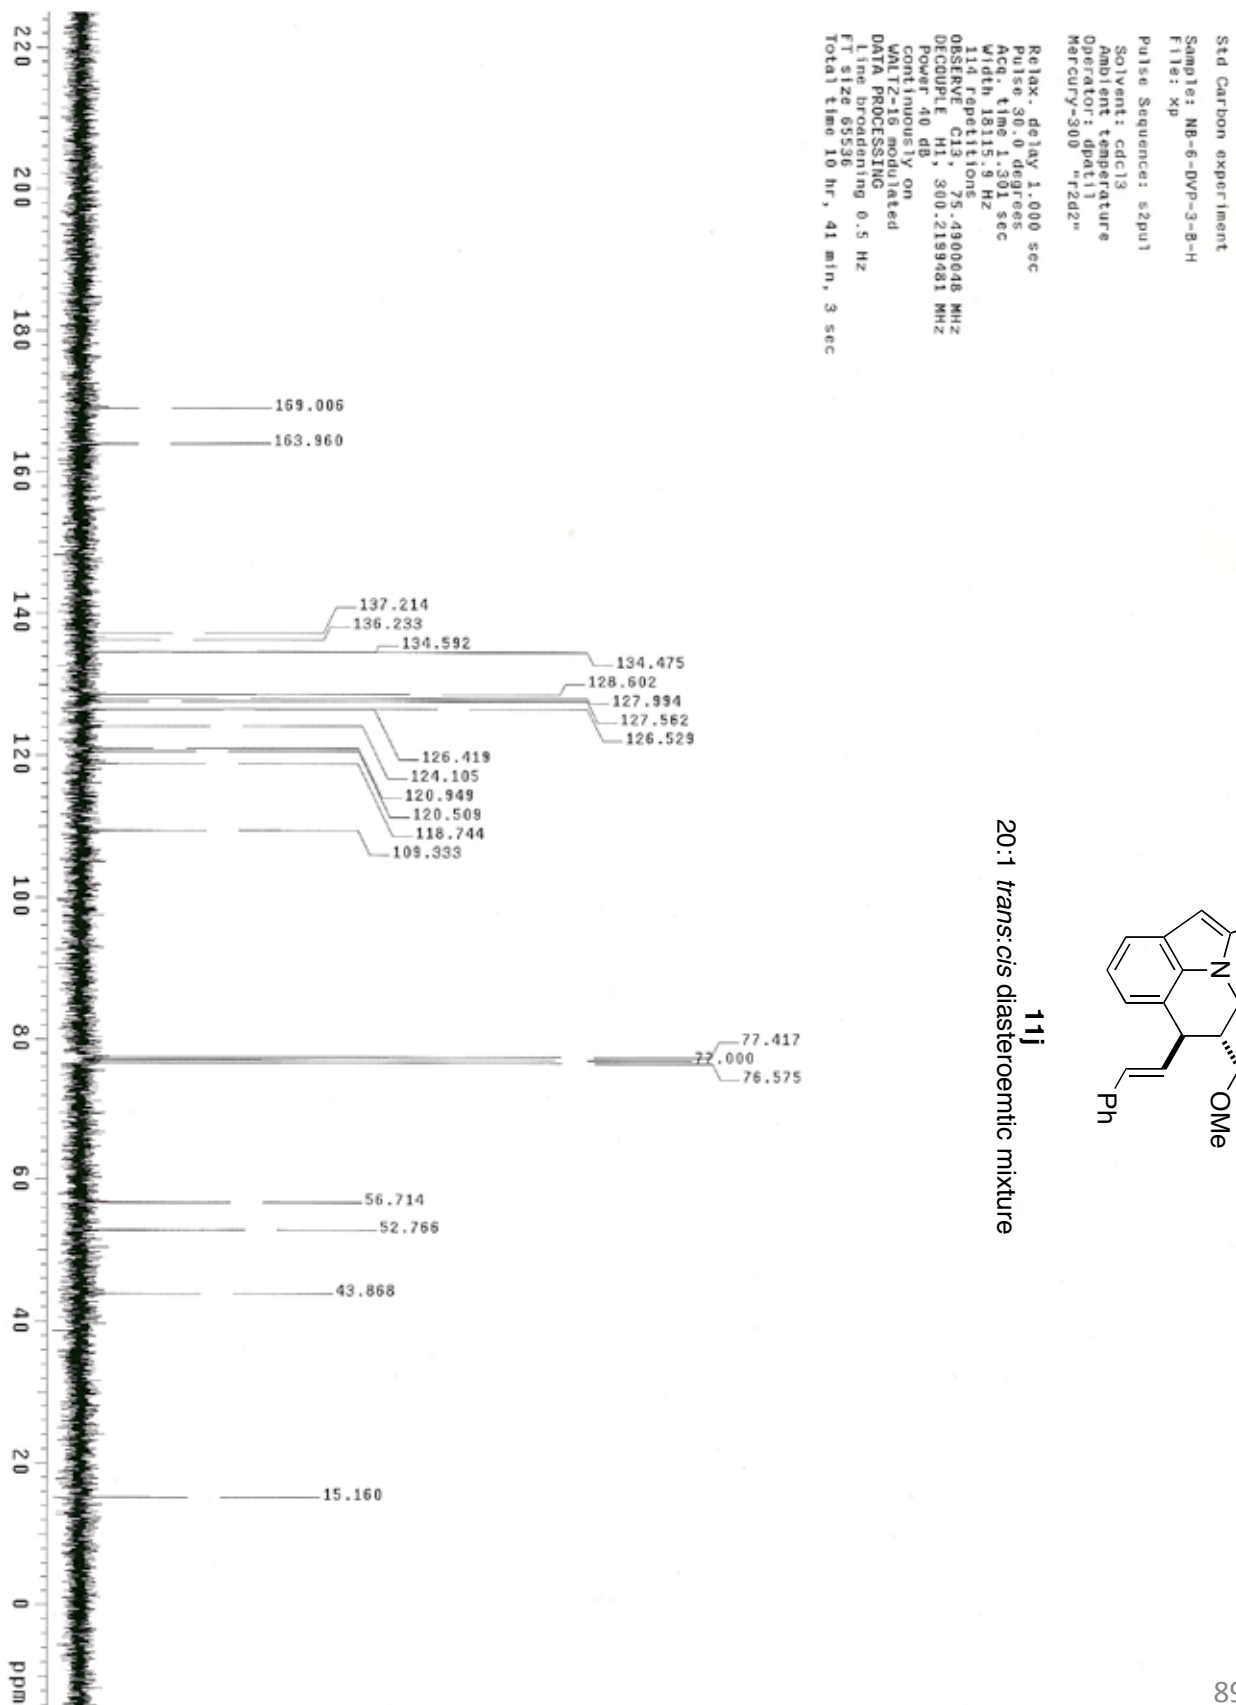



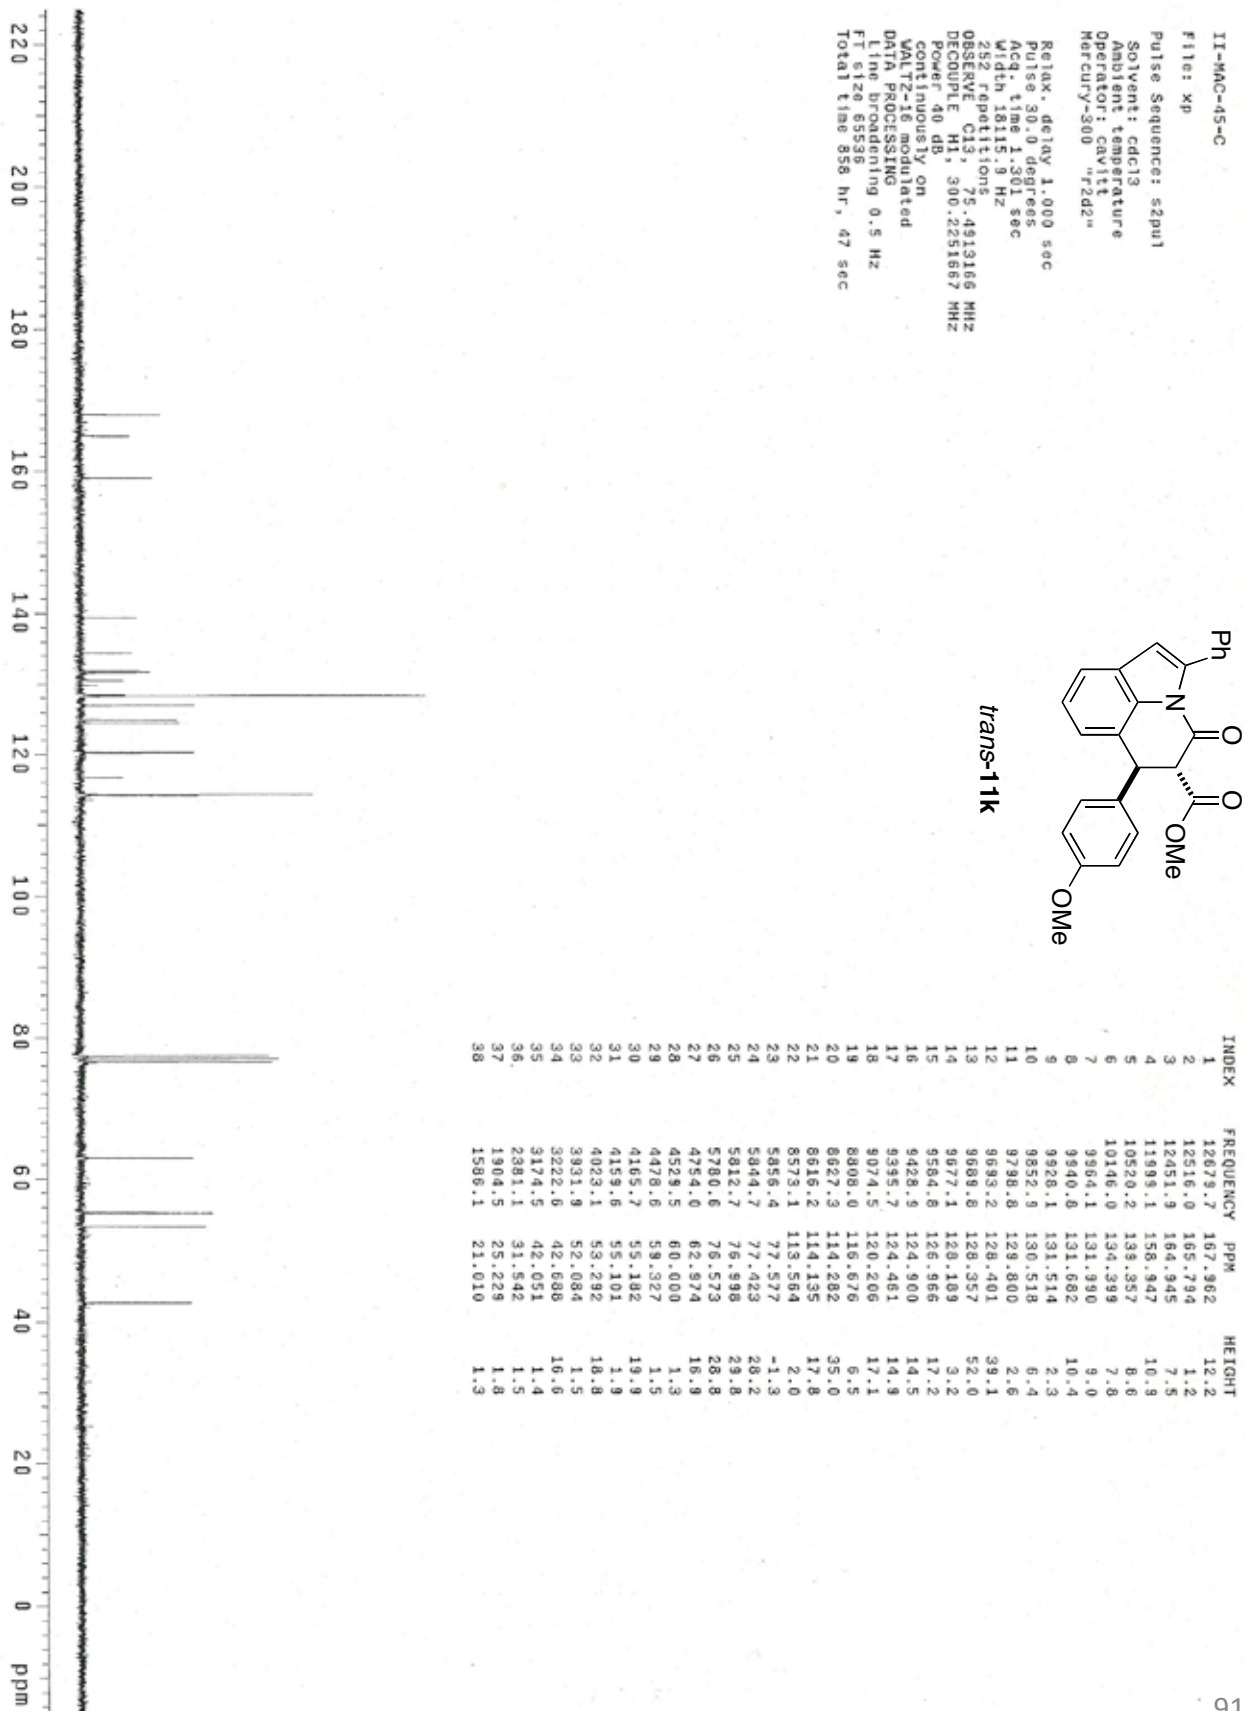

2,3-Me,Me-Cyclized-2-Substituted-Paper  
Marchello

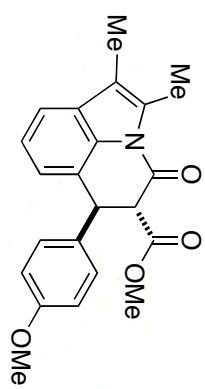

*trans*-111

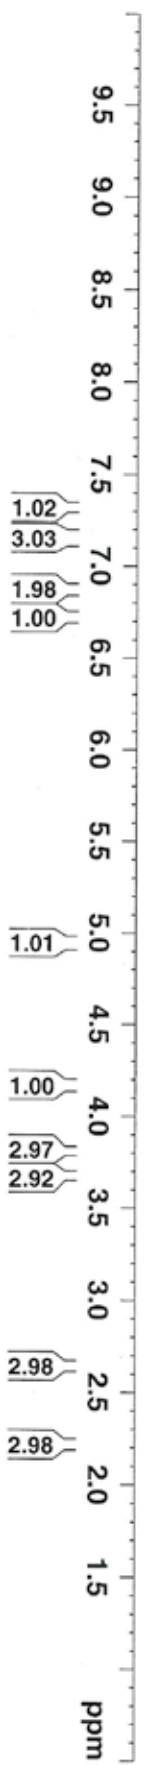

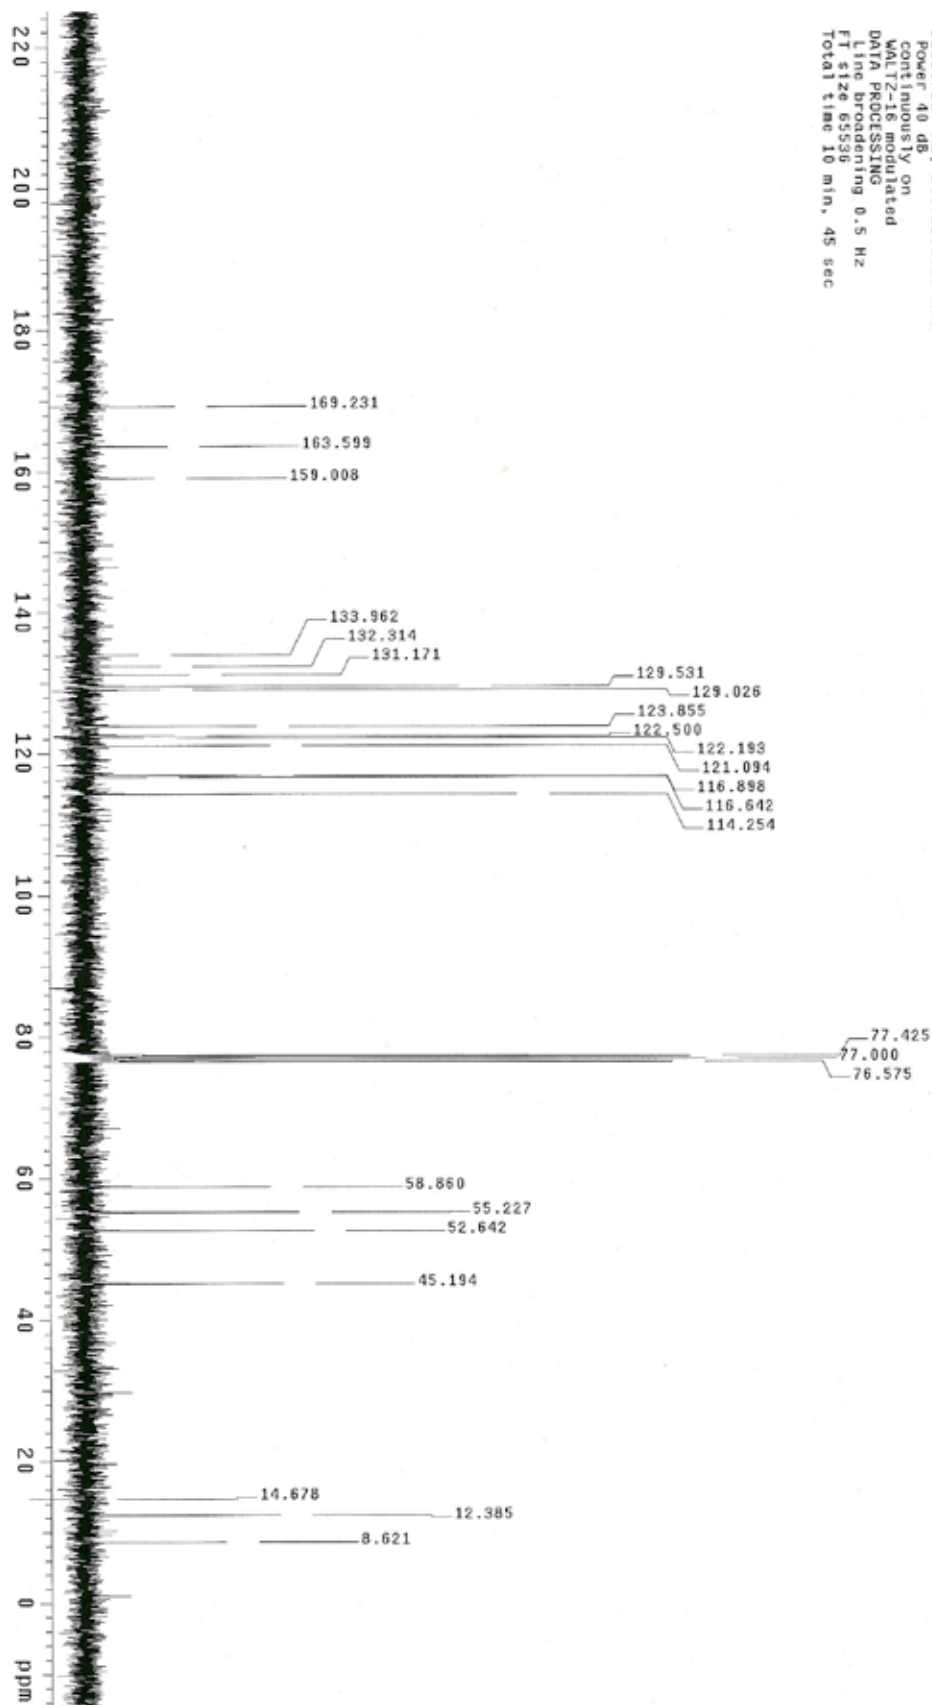

Std Carbon experiment  
Sample: Nu-5-DVP-34-H  
File: xp  
Pulse Sequence: s2pu1  
Solvent: cdcl3  
Ambient temperature  
Operator: dpal11  
Mercury-300 "r2d2"  
Relax. delay 1.000 sec  
Pulse 30.0 degrees  
Acq. time 1.301 sec  
Width 1615.9 Hz  
256 Repetitions  
OBSERVE C13, 75.4919142 MHz  
DECOUPLE H1, 300.2251667 MHz  
Power 40 dB  
Continuously on  
WALTZ-16 modulated  
DATA PROCESSING  
Line broadening 0.5 Hz  
FT size 65536  
Total time 10 min, 45 sec

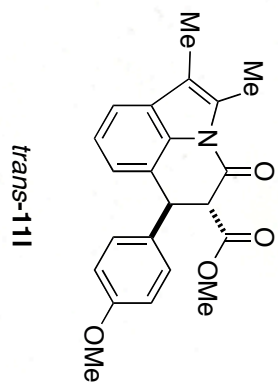

Std Proton parameters  
Sample: **MS-02-12-12**  
File: xp  
Pulse Sequence: s2pu1  
Solvent: cdcl3  
Ambient temperature  
Operator: dpa111  
Mercury-300 "r202"  
Relax. delay 1.000 sec  
Pulse 30.0 degree  
Acq. time 3.550 sec  
Width 4803.1 Hz  
S4 repetitions  
OBSERVE H1, 300.2185002 MHz  
DATA PROCESSING  
FT size 65536  
Total time 15 hr, 51 min, 3 sec

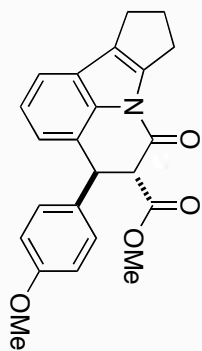

*trans*-11m

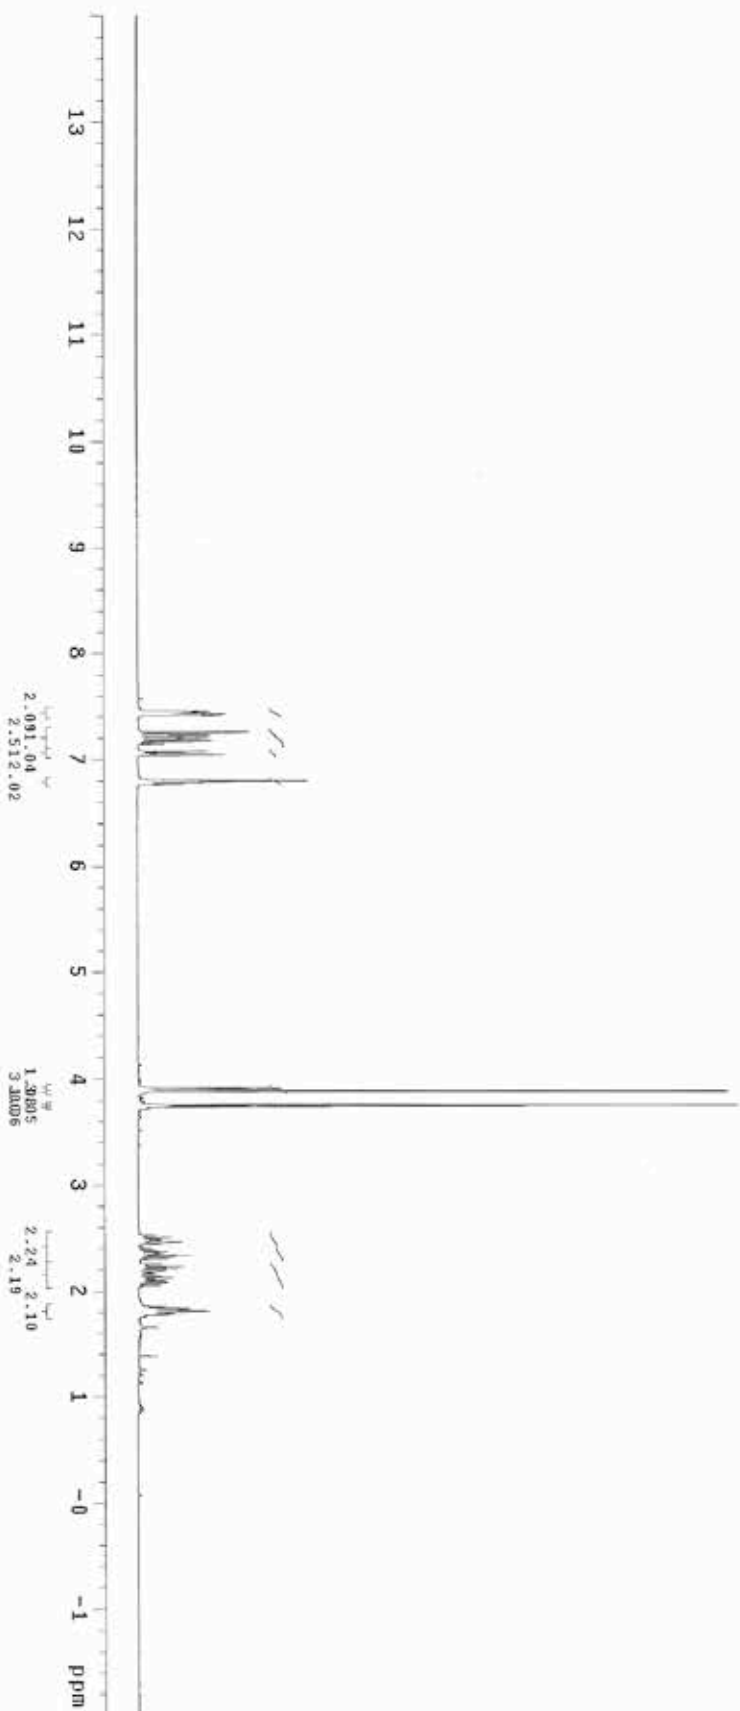

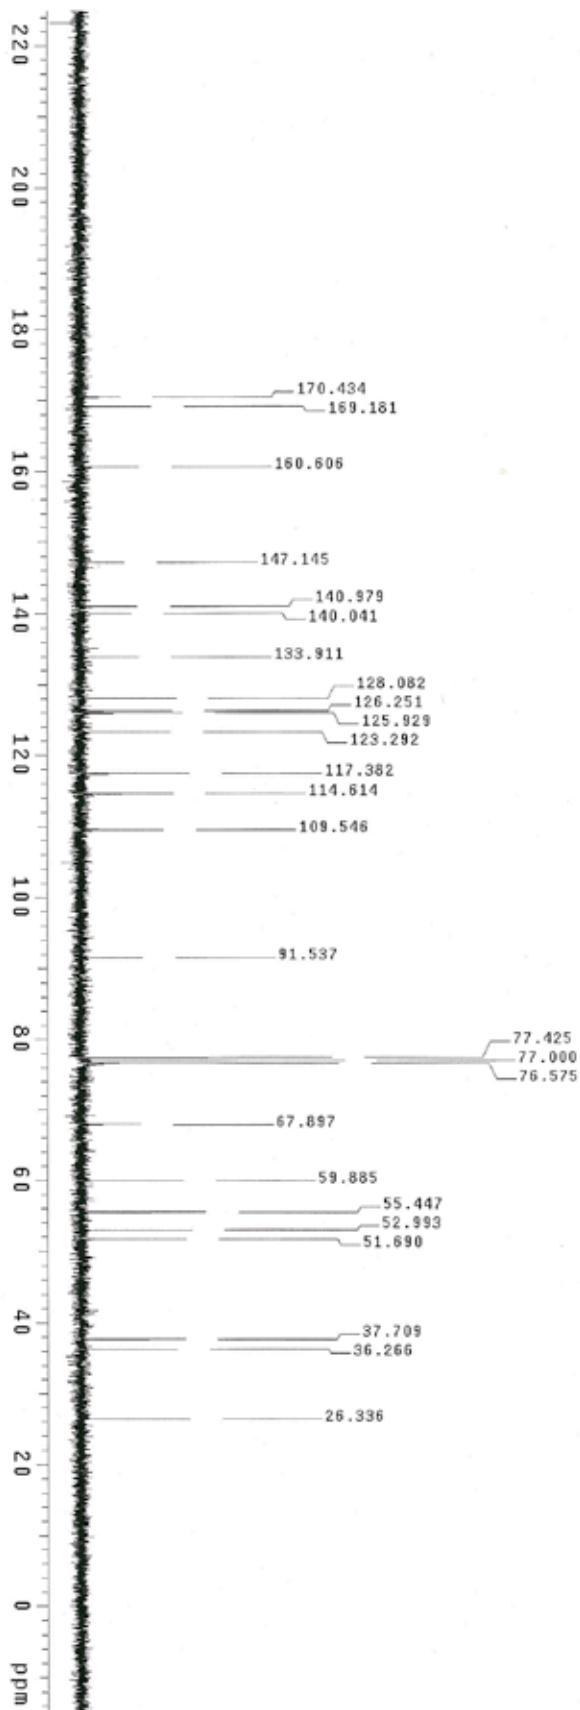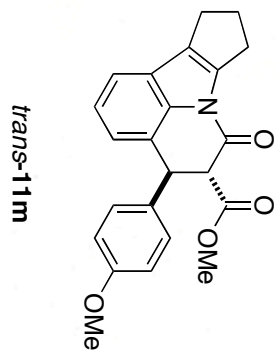

Std Carbon experiment  
Sample: indolecyclopentyl-cyclin-H  
File: xp  
Pulse Sequence: szput  
Solvent: cdcl3  
Ambient temperature  
Operator: opalli  
Mercury-300 "r282"  
Relax. delay 1.000 sec  
Pulse 30.0 degrees  
Acq. time 1.301 sec  
Width 18115.8 Hz  
60 repetitions  
OBSERVE C13, 75.4900048 MHz  
DECUPLE H1, 300.219481 MHz  
Power 40 dB  
continously on  
WALTZ-16 modulated  
DATA PROCESSING  
Line broadening 0.5 Hz  
F1 size 65536  
Total time 10 hr, 41 min, 3 sec

III-MAC-38

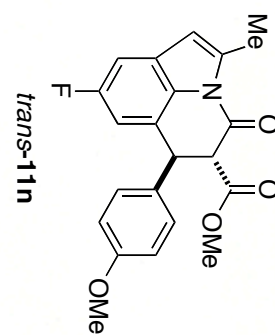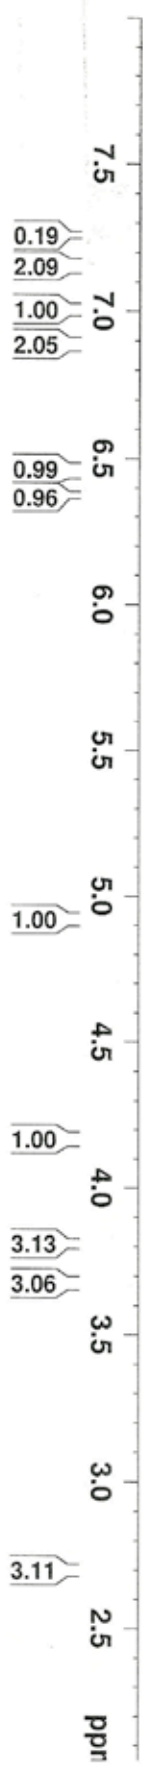



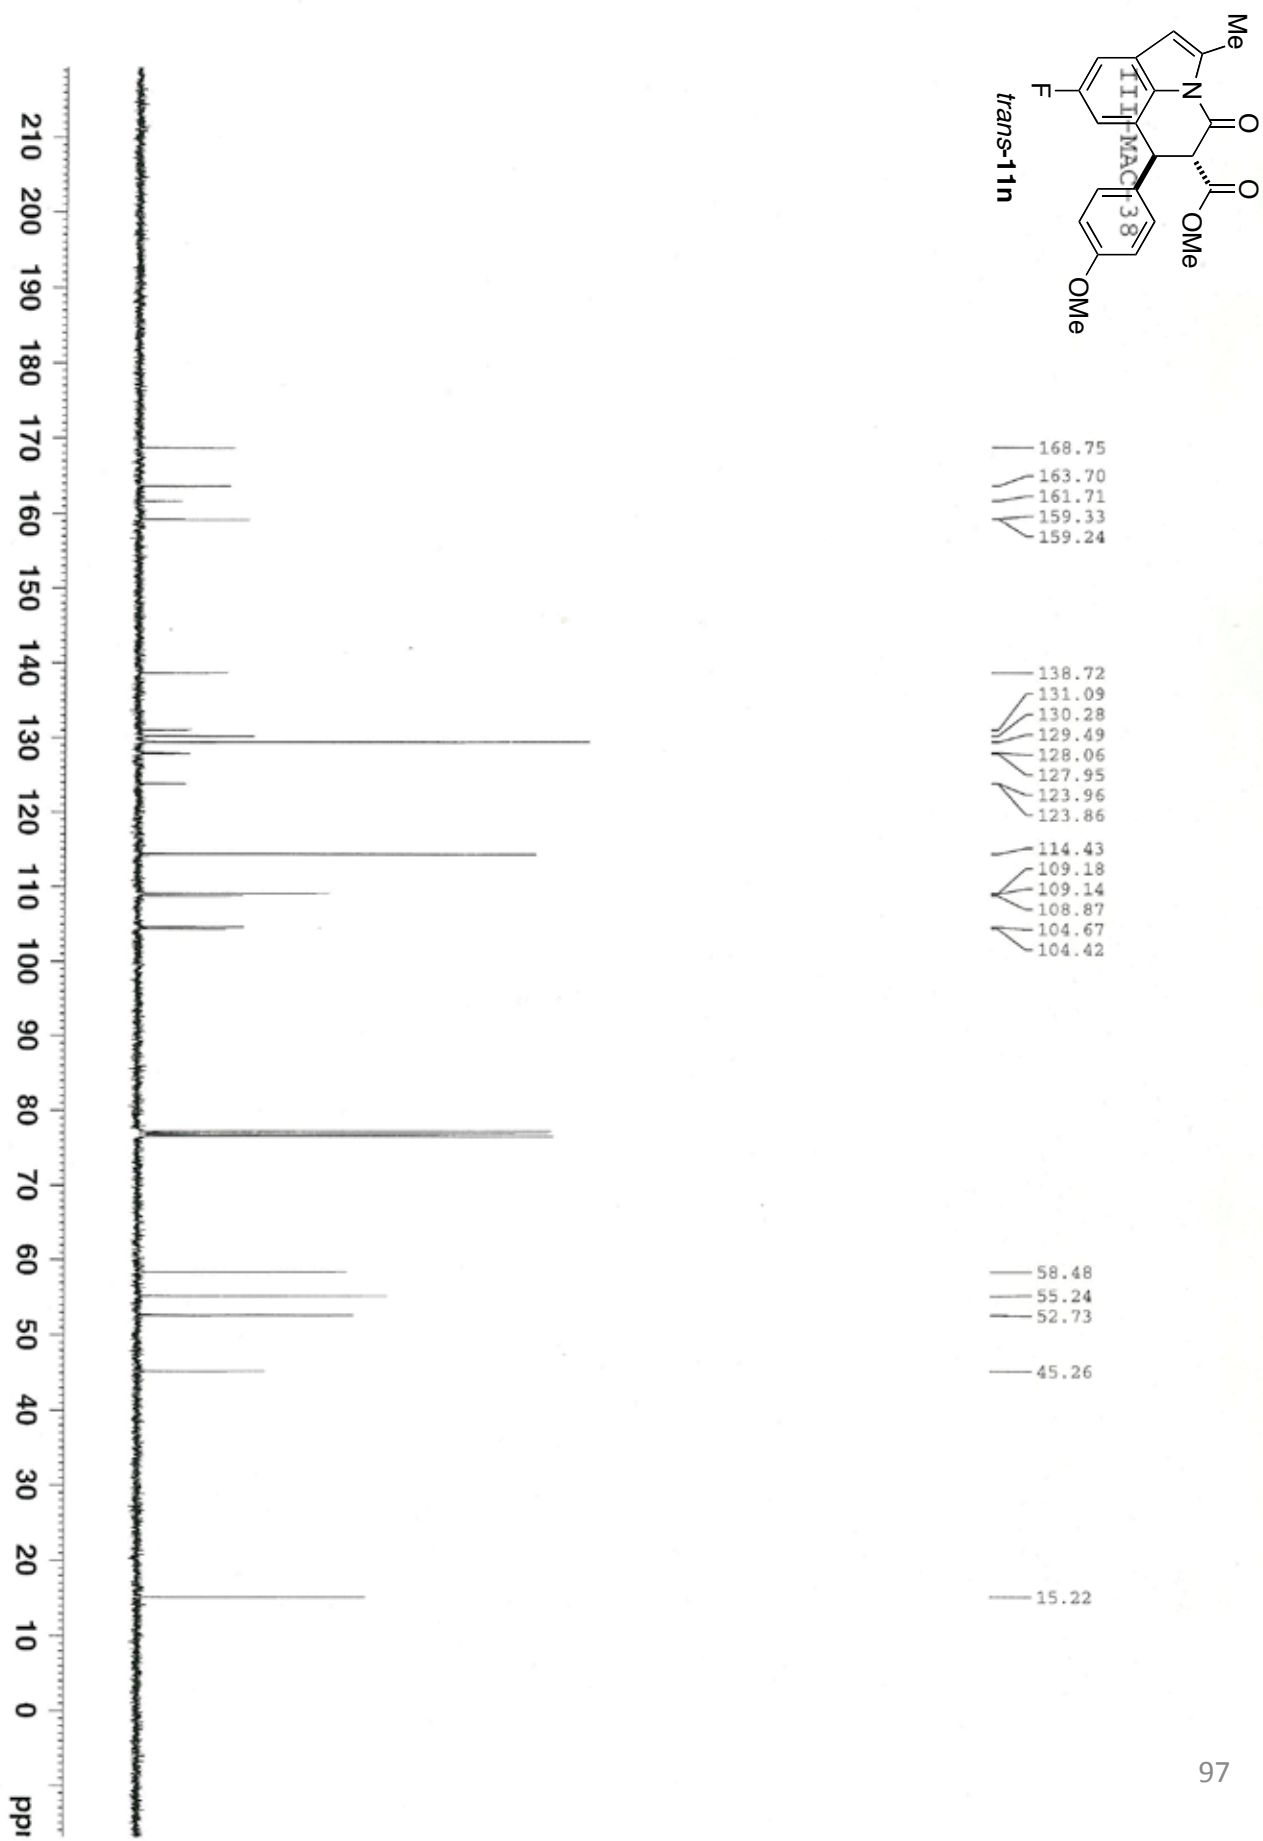

III-MAC-38

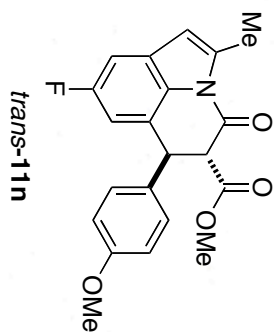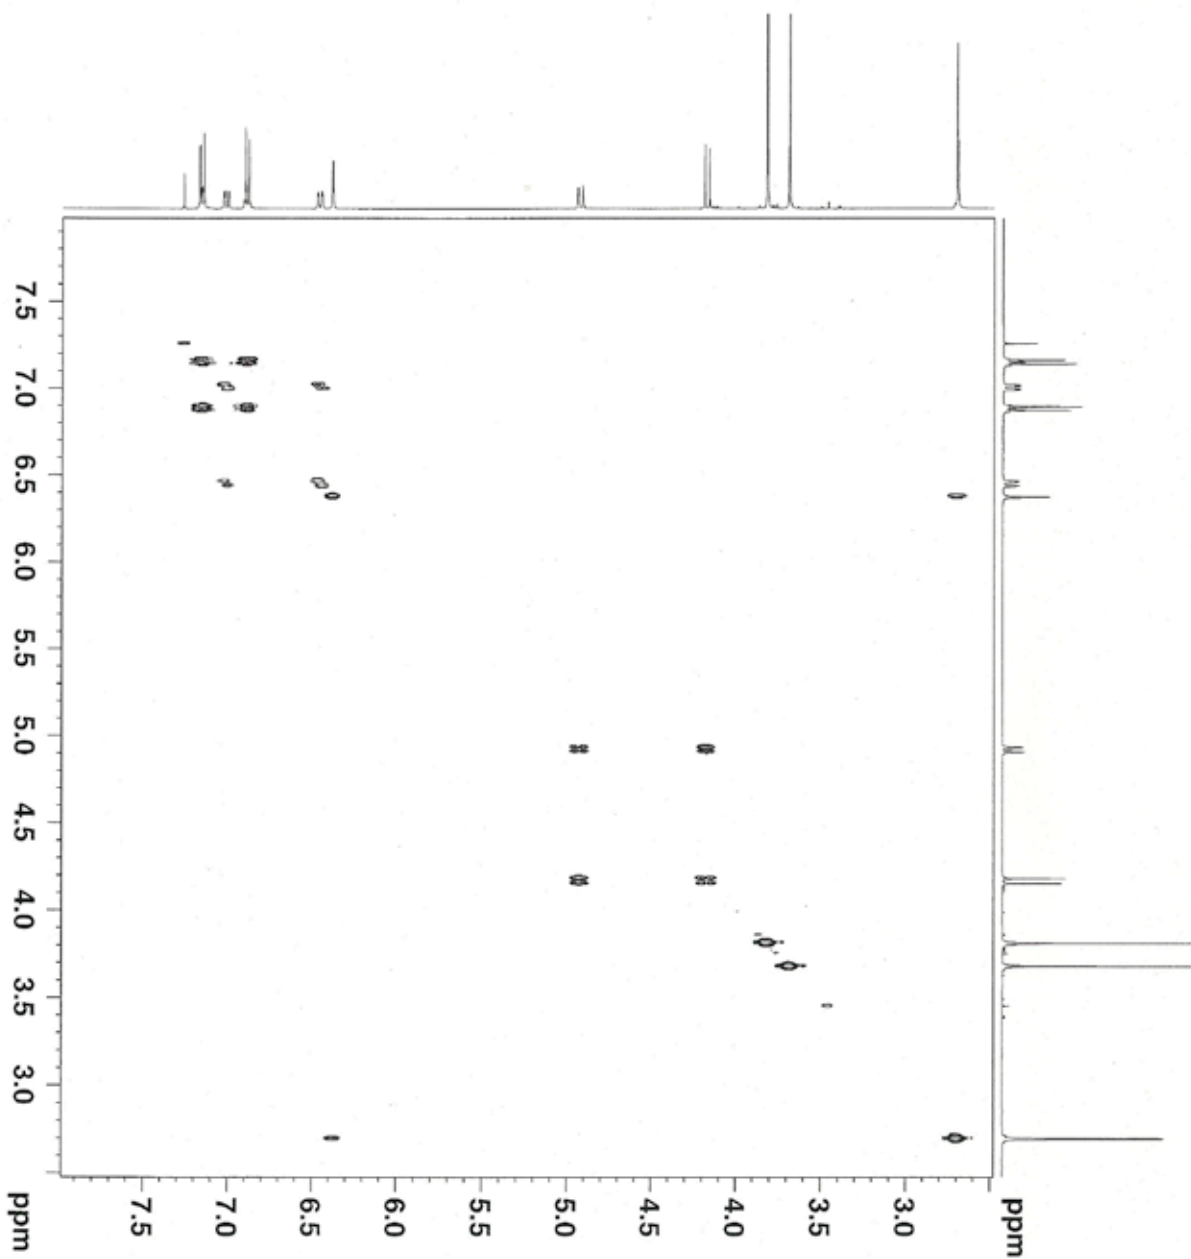

III-MAC-38

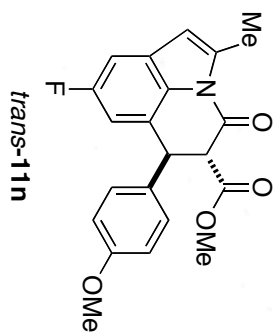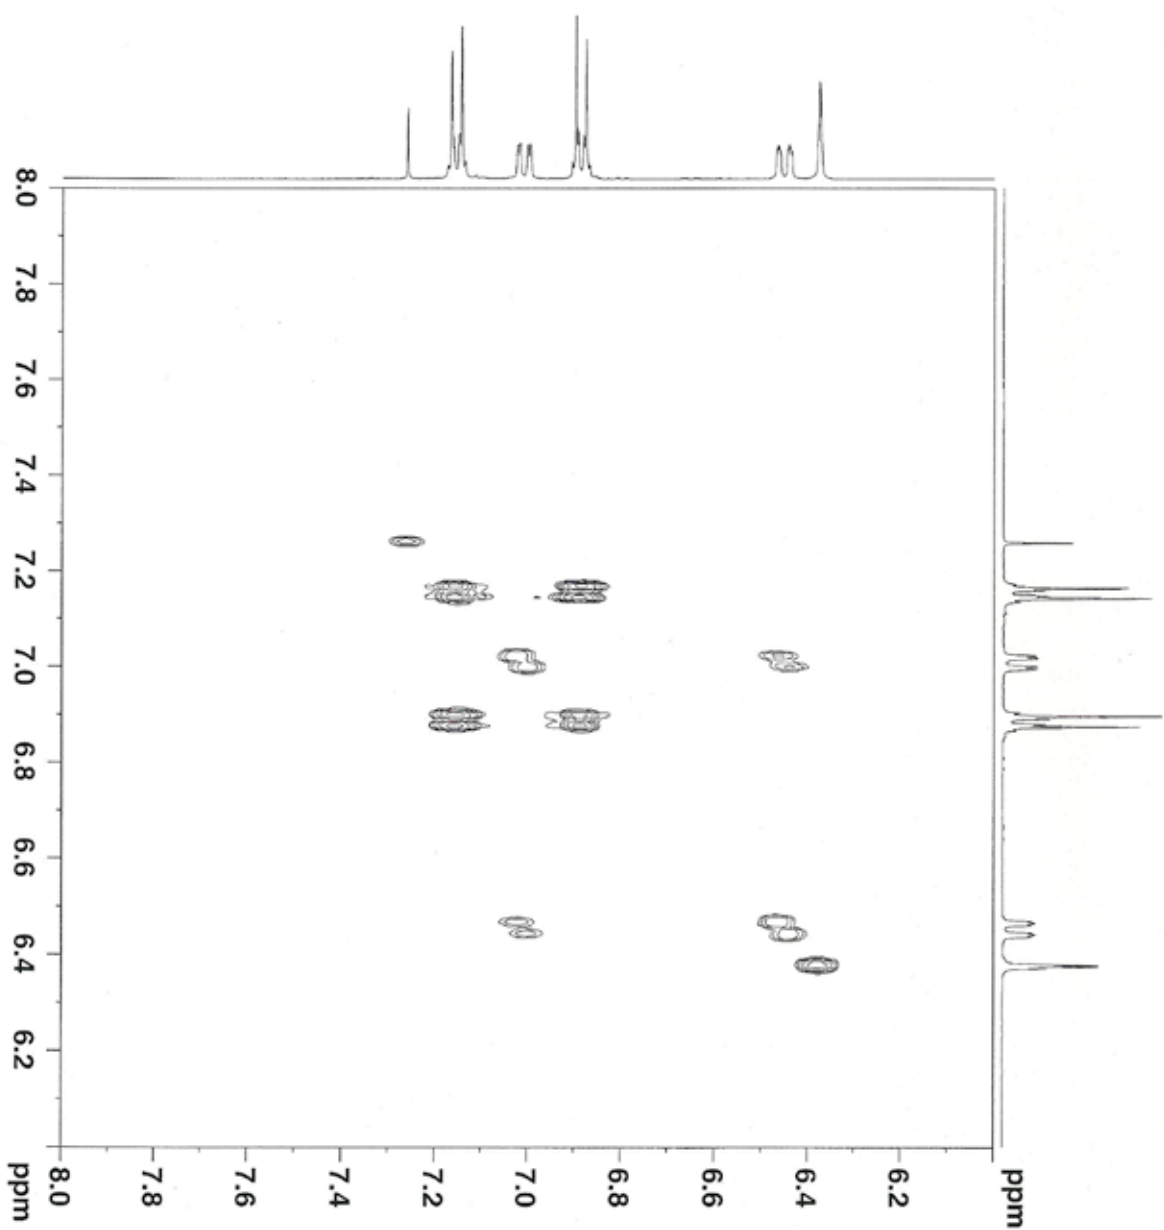

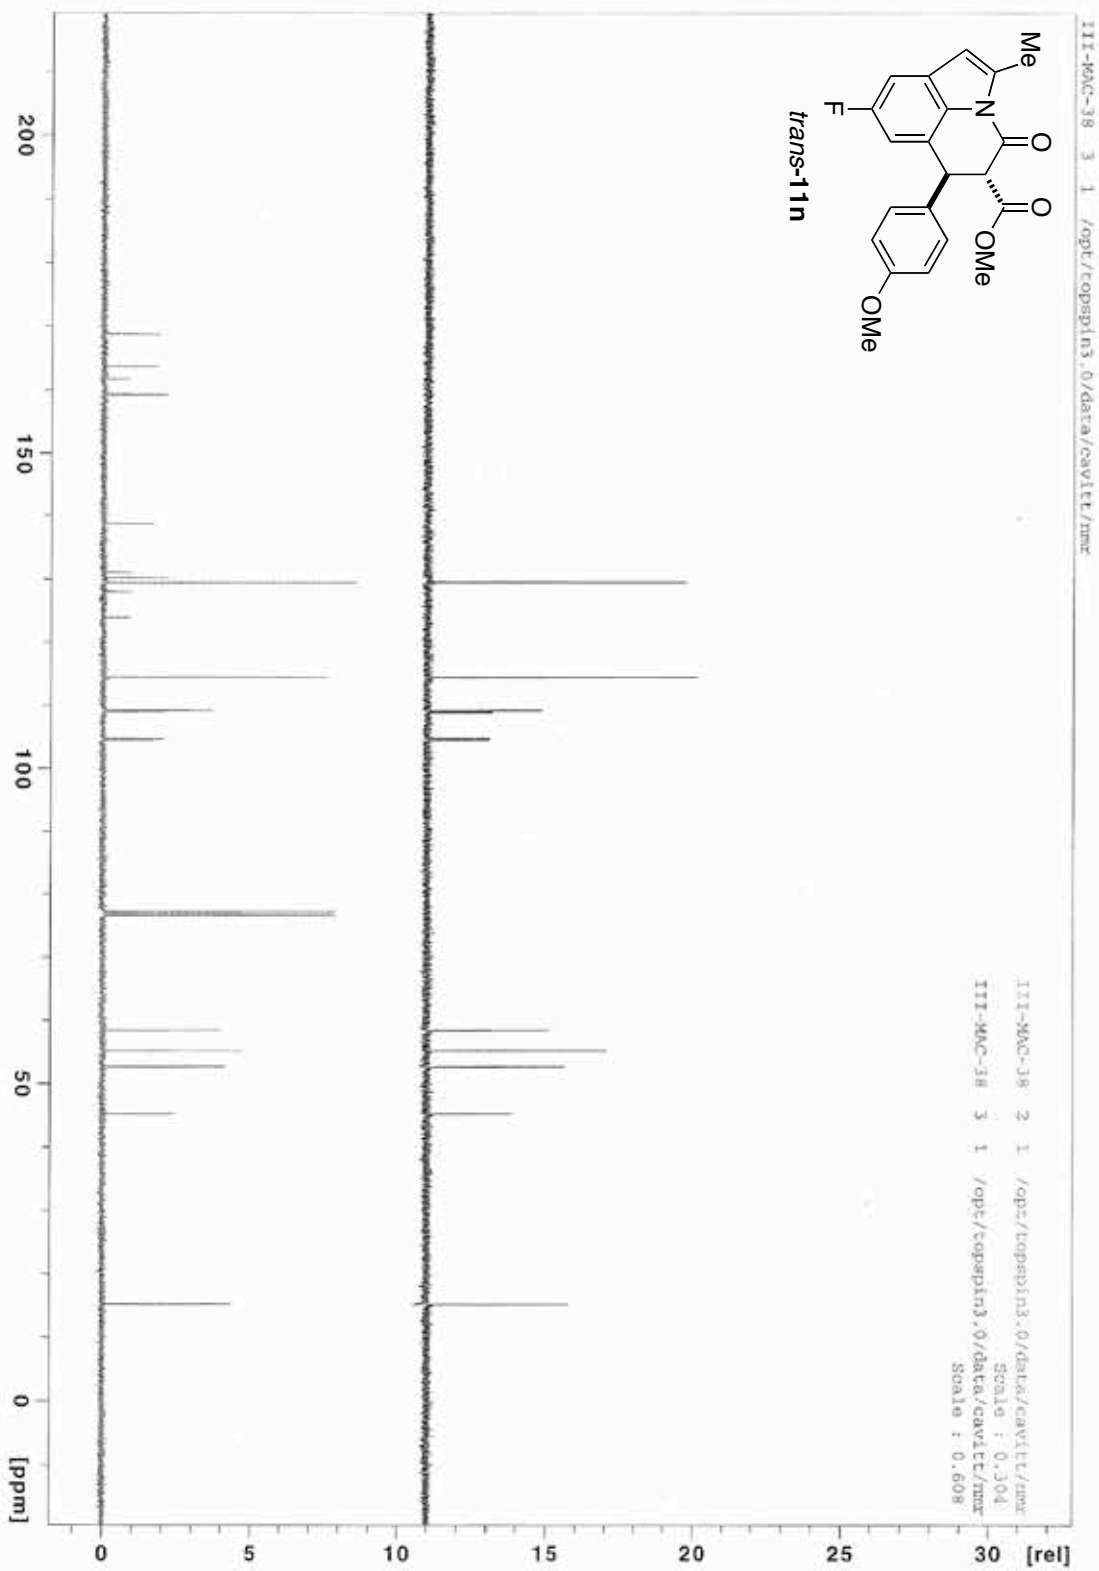

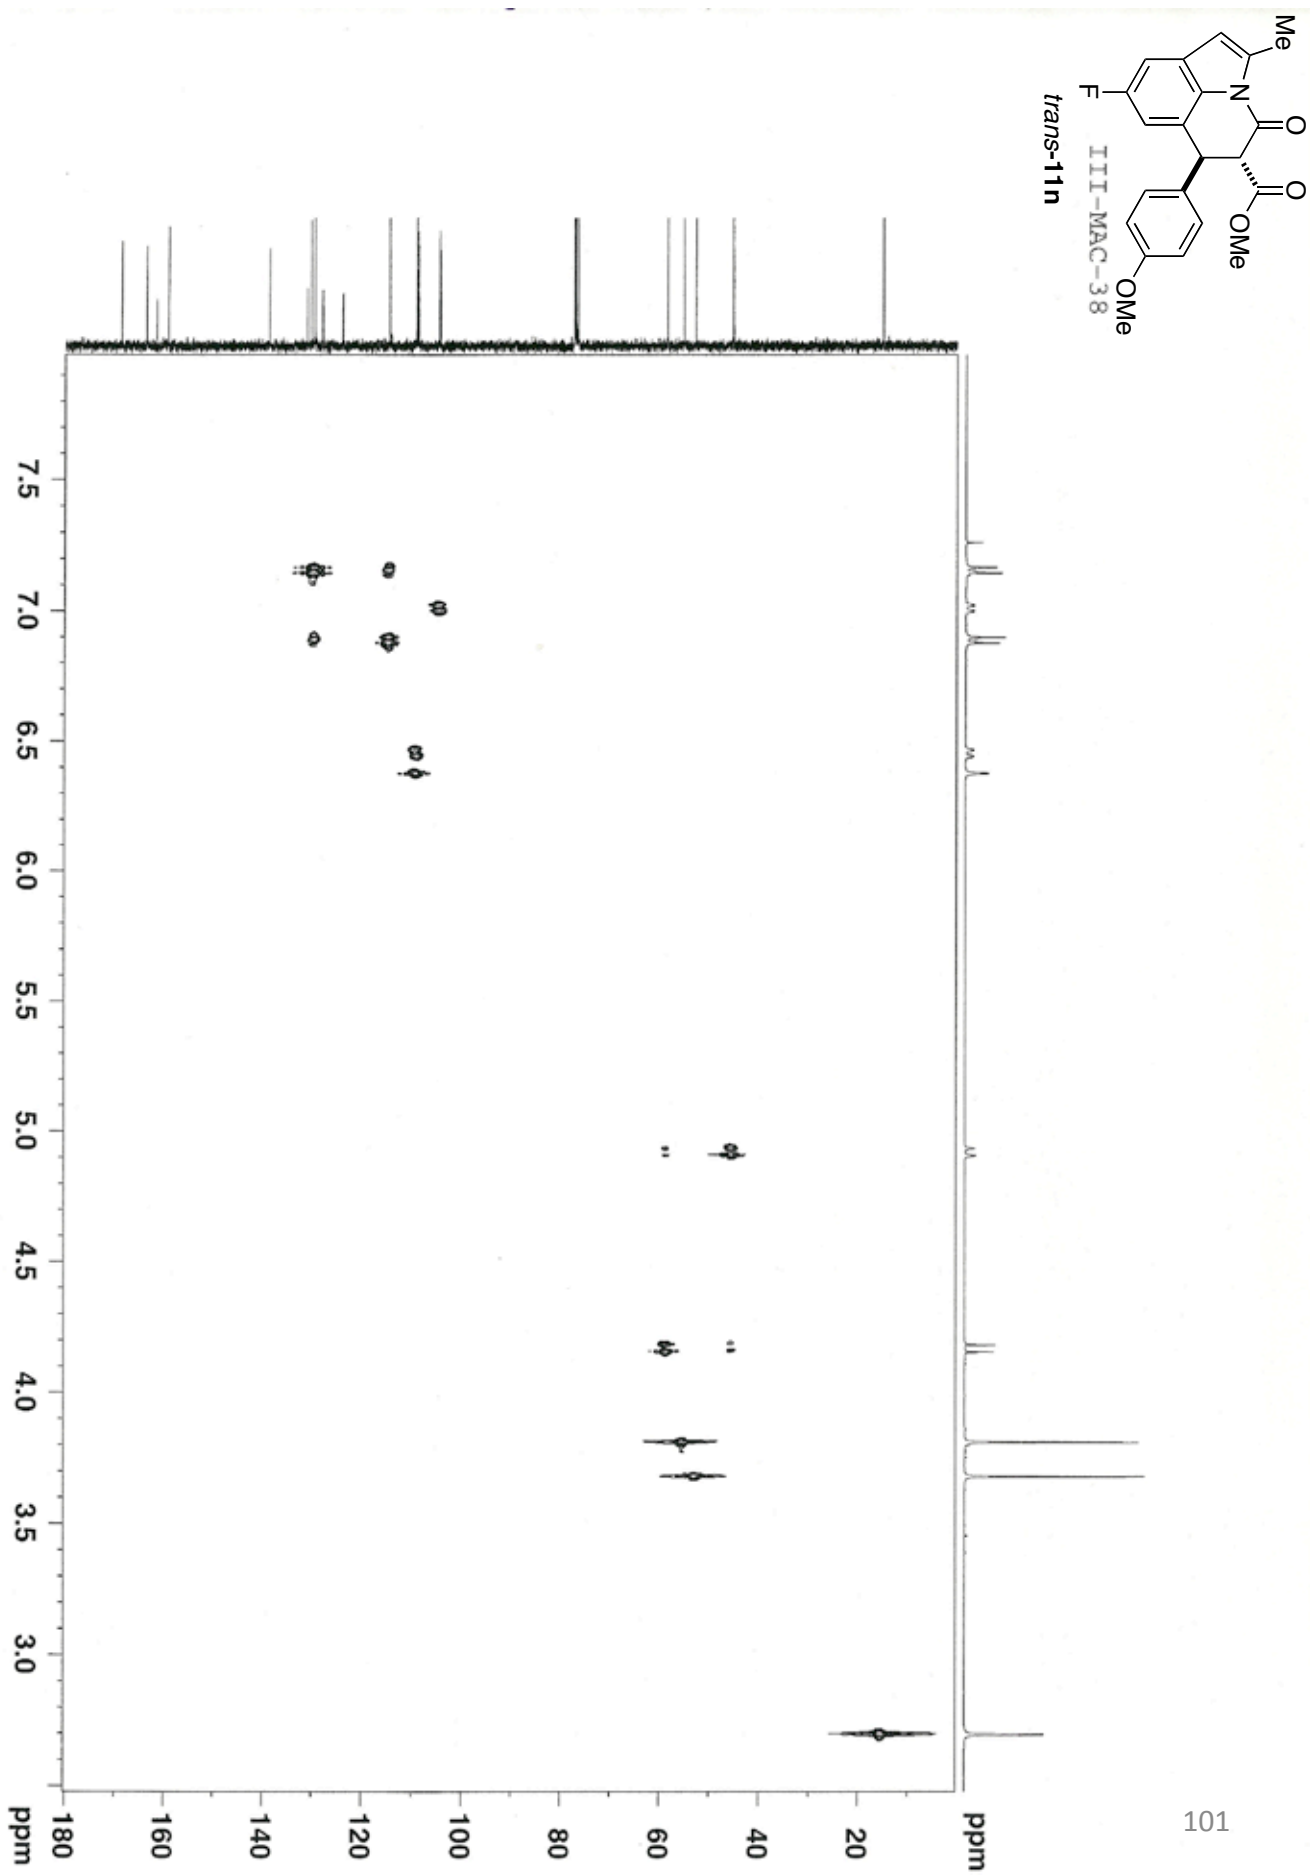

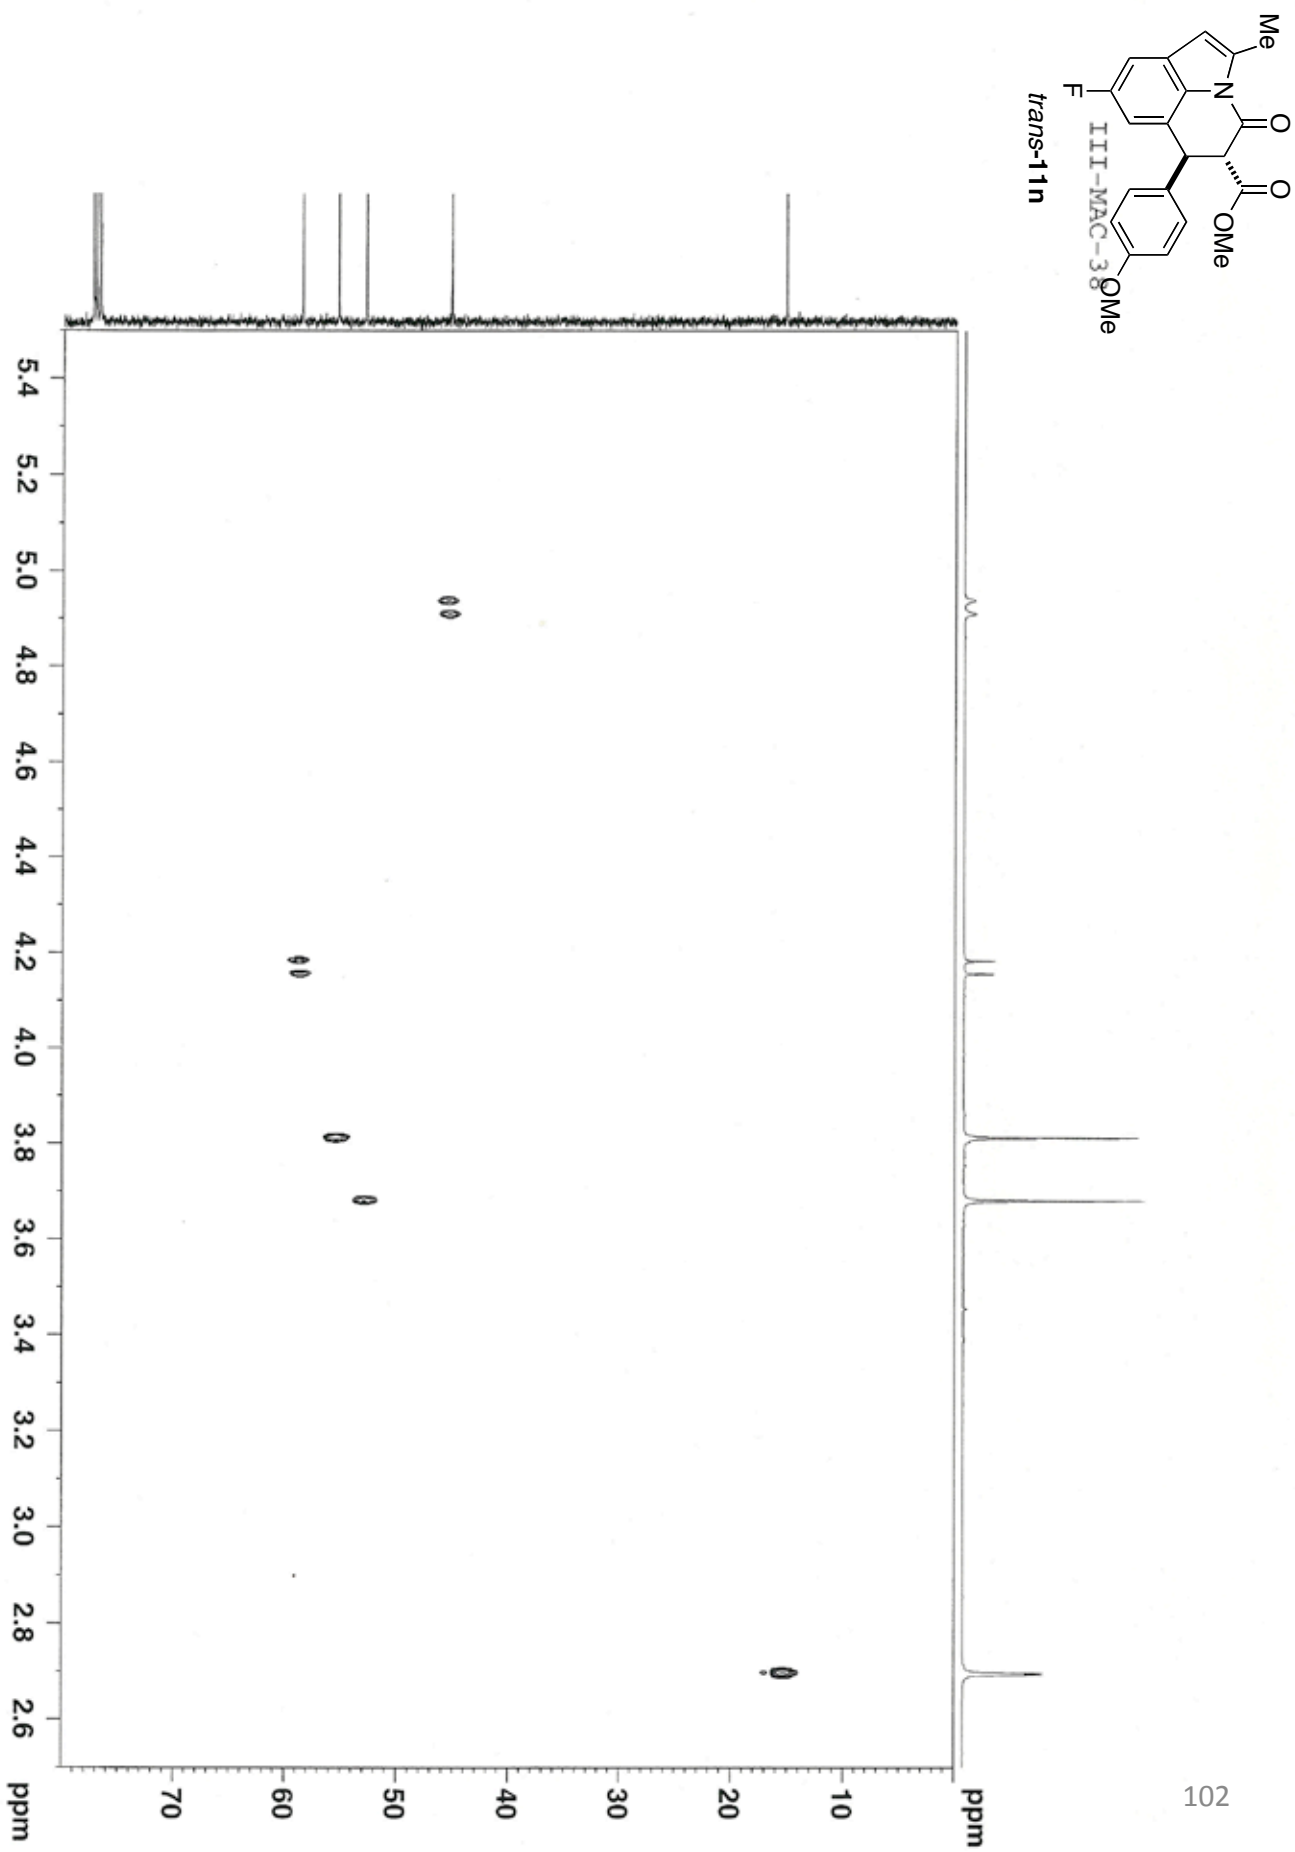

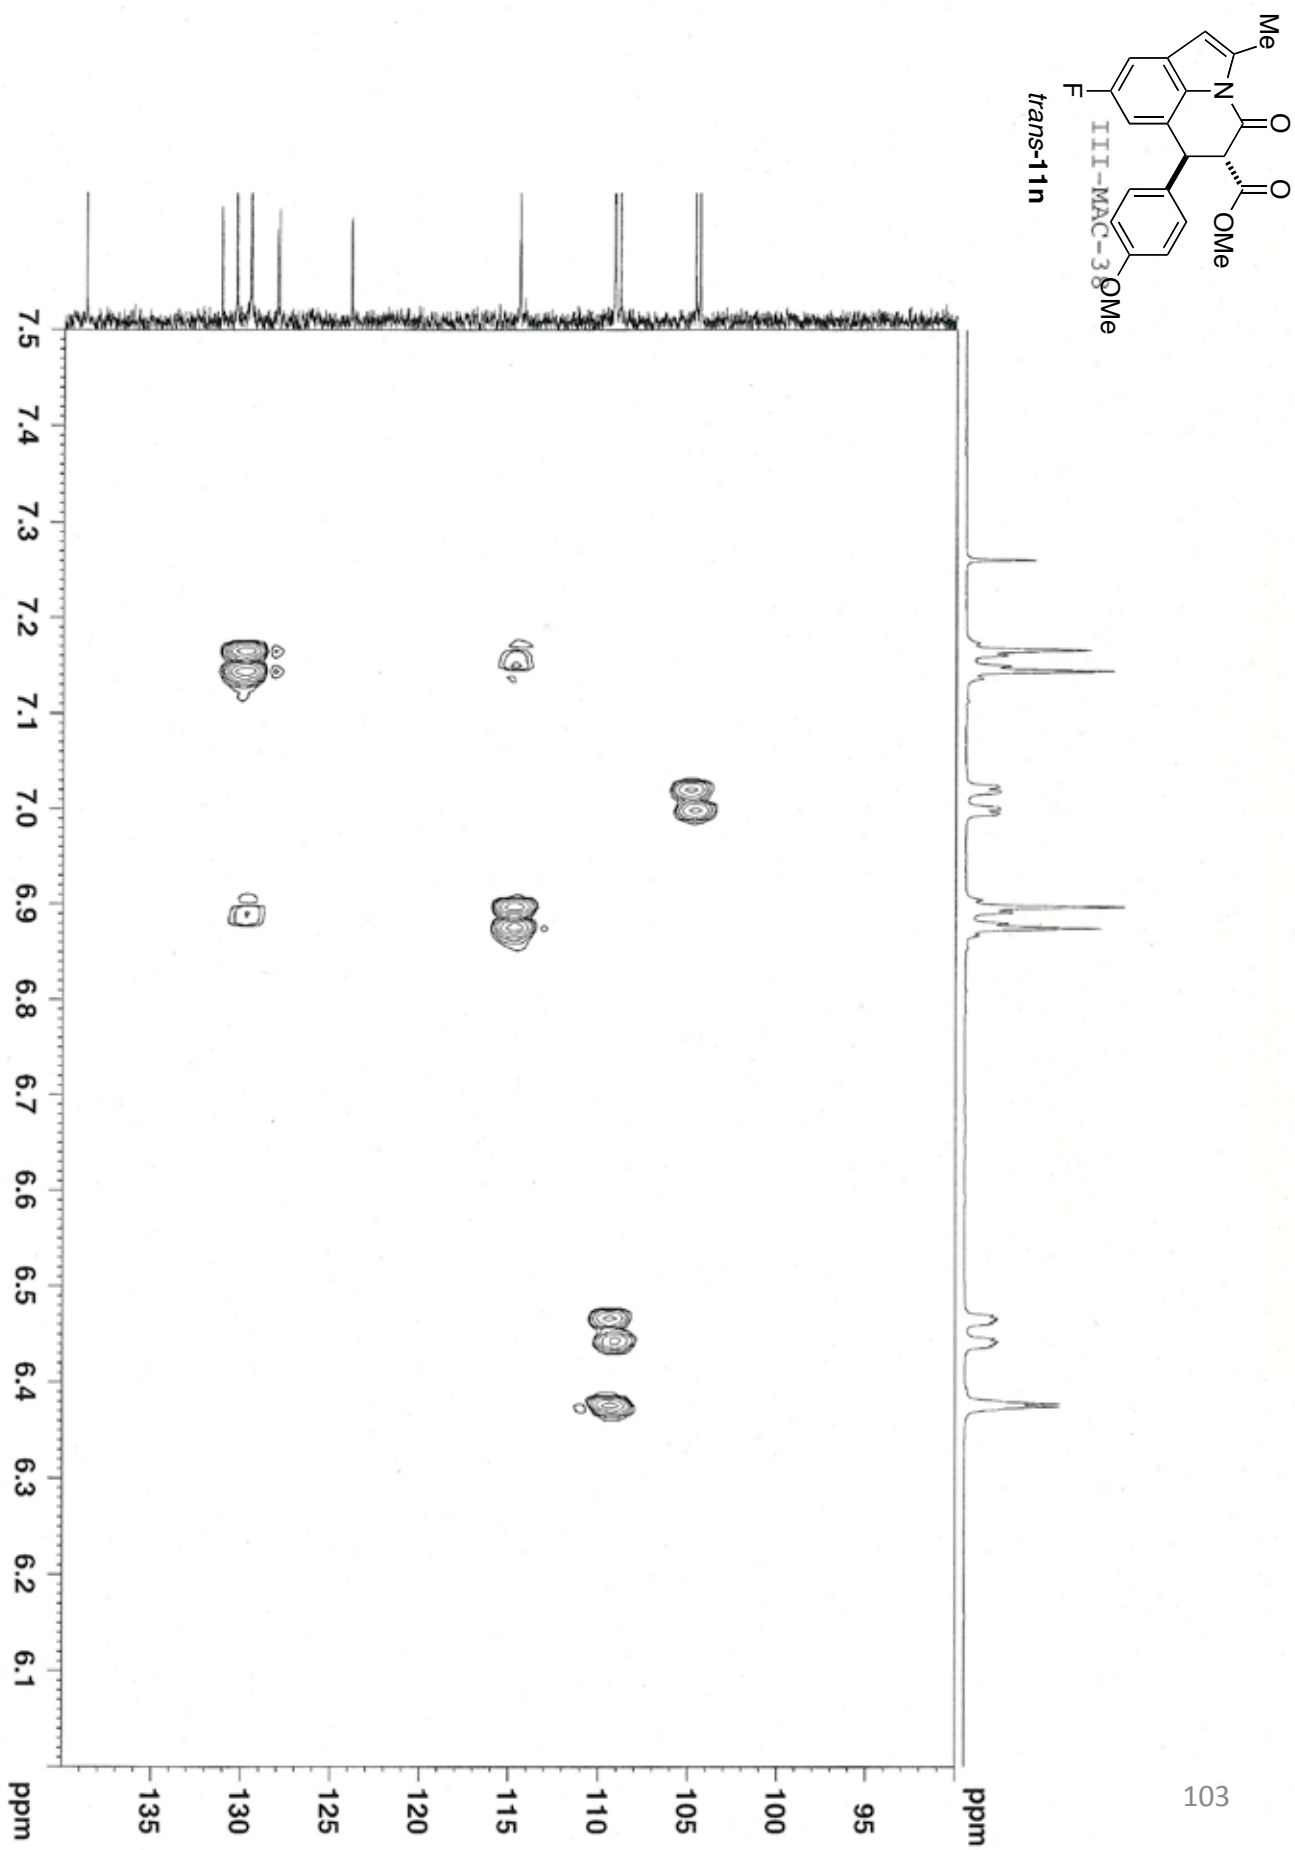

Std Proton parameters  
Sample: NB-5-OVP-195-H  
File: xp  
Pulse Sequence: s2pu1  
Solvent: cdcl3  
Ambient temperature  
Operator: dpatt1  
Mercury-300 "r2d2"  
Relax. delay 1.000 sec  
Pulse 30.0 degrees  
Acq. time 3.550 sec  
Width 4803.1 Hz  
28 repetitions  
OBSERVE H1, 300.2105197 MHz  
DATA PROCESSING  
FT size 65536  
Total time 15 hr, 51 min, 3 sec

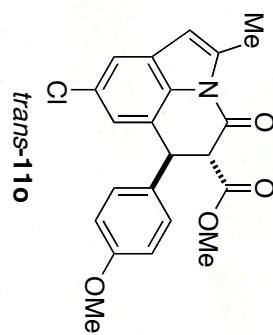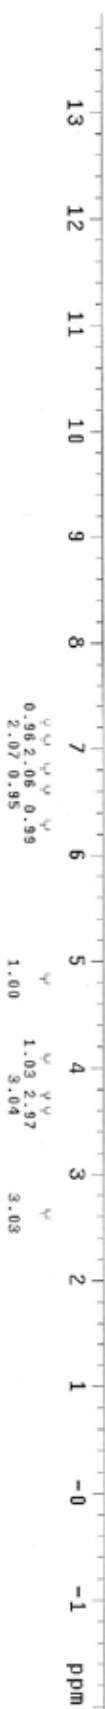



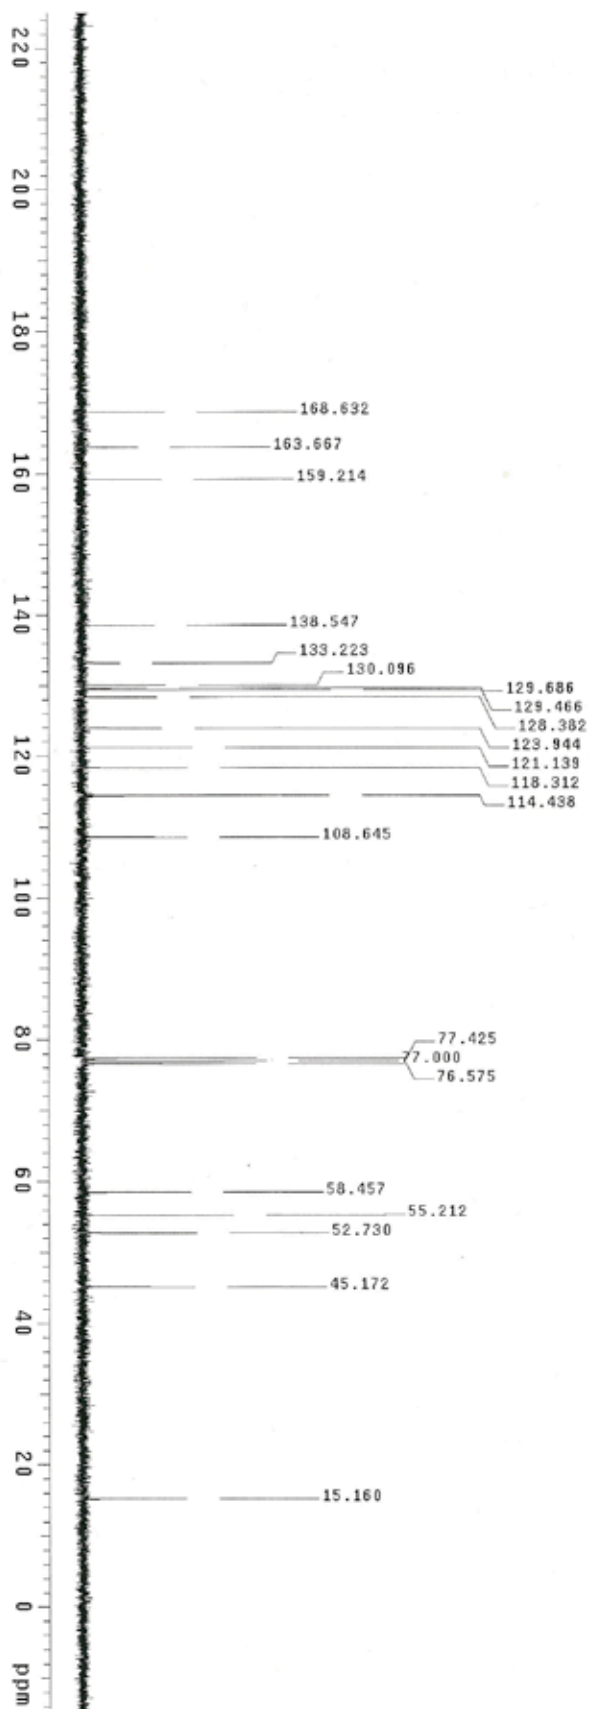

Std Carbon experiment  
Sample: NB-5-DVP-135-H  
File: xp  
Pulse Sequence: s2pu1  
Solvent: cdcl3  
Ambient Temperature  
Operator: dpat11  
Mercury-300 "r2d2"  
Relax. delay 1.000 sec  
Pulse 30.0 degrees  
Acq. time 1.301 sec  
Width 18115.9 Hz  
56 repetitions  
OBSERVE C13, 75.4900059 MHz  
DECUPLE H1, 300.2193481 MHz  
Power 40 dB  
continuously on  
WALTZ-16 modulated  
DATA PROCESSING  
Line broadening 0.5 Hz  
FT size 65536  
Total time 10 hr, 41 min, 3 sec

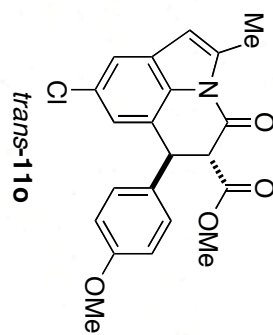

black\_cap #2  
Sample: NB-5-DVP-122-A-H  
File: nomr/france/dpall1/NB-5-DVP-122-A-H.FID  
Pulse Sequence: zgpg30  
Solvent: cdcl3  
Ambient temperature  
Operator: dpall1  
File: NB-5-DVP-122-A-H  
Mercury-300 "p2d2"  
Relax. delay: 1.000 sec  
Pulse: 30.0 degrees  
Acq. time: 3.550 sec  
Width: 4803.1 Hz  
IS REPETITIONS  
ORSEAVE NI: 300.2184994 MHz  
DATA PROCESSING  
FT size 65536  
Total time 1 min, 16 sec

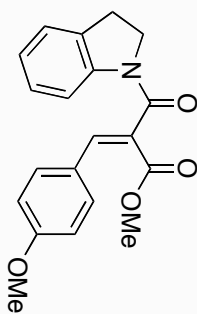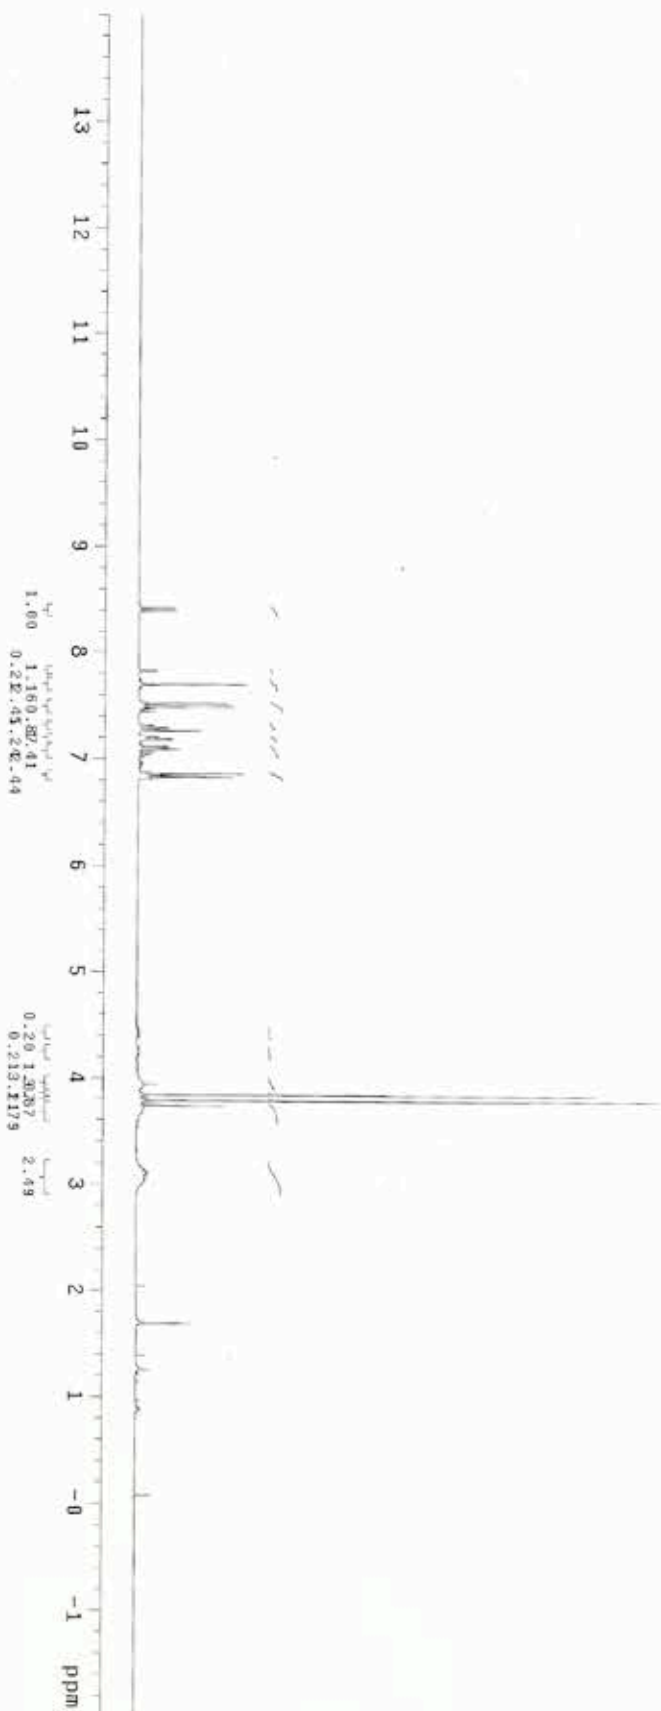

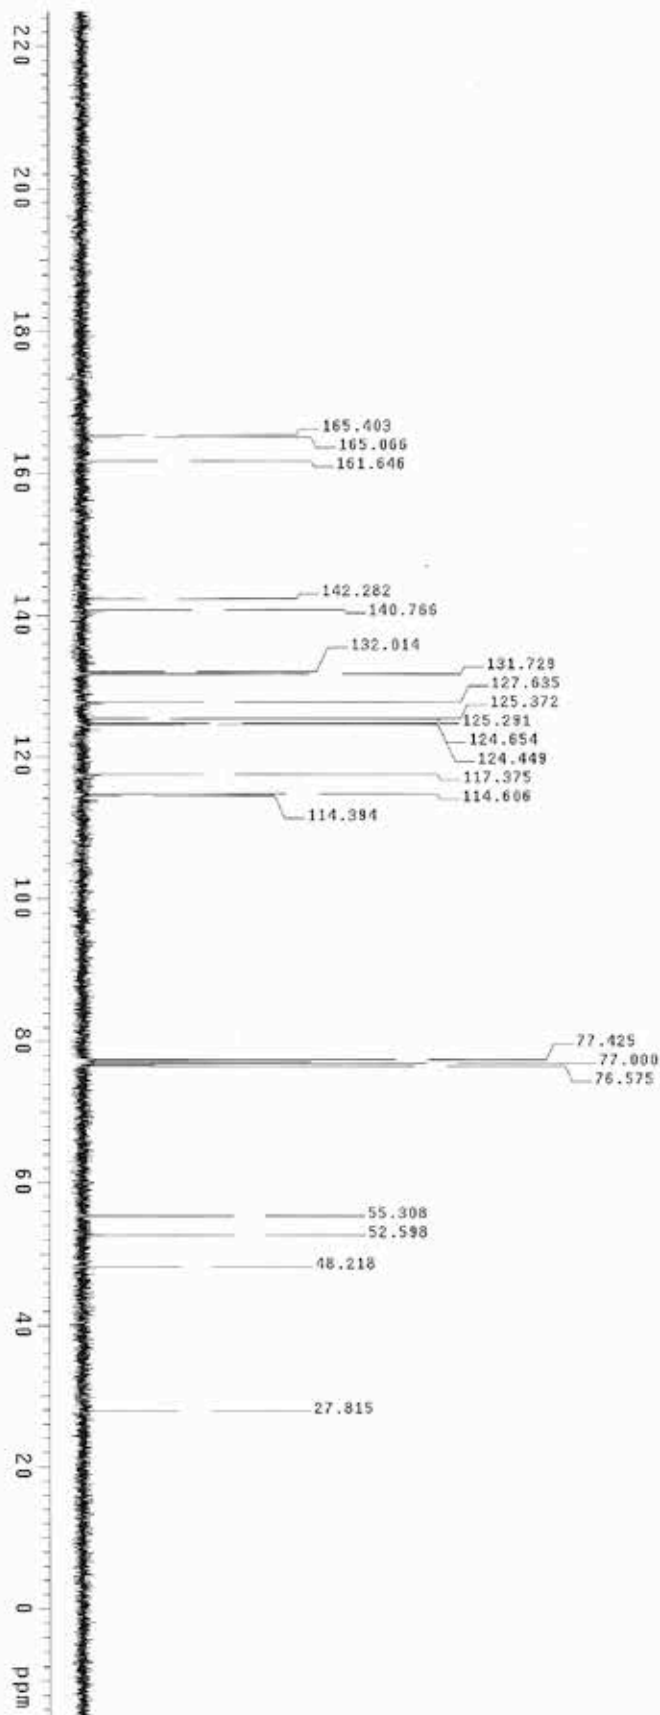

Std Carbon experiment  
Sample: N8-5-DVP-122-B-H  
File: xp  
Pulse Sequence: s2put1  
Solvent: cdcl3  
Ambient temperature  
Operator: dpatt1  
Mercury-300 "12d2"  
Relax. delay 1.000 sec  
Pulse 30.0 degrees  
Acq. time 1.301 sec  
Width 18115.9 Hz  
192 repetitions  
OBSERVE C13, 75.4800054 MHz  
DECUPLE H1, 300.2199461 MHz  
Power 40 dB  
continuously on  
WALTZ-16 modulated  
DATA PROCESSING  
Line broadening 0.5 Hz  
FT size 65536  
Total time 10 min, 45 sec

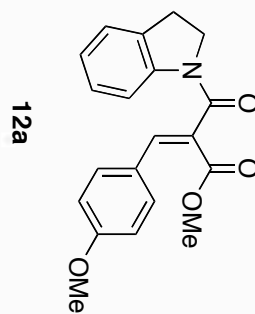

7b  
File: xp  
Pulse Sequence: szpu1  
Solvent: CDCl3  
Ambient temperature  
Operator: cavitt  
Mercury-400RB "amida1a"  
Relax: delay 1.000 sec  
Pulse: 30.0 degrees  
Acq: time 2.659 sec  
Width: 6398.0 Hz  
47 repetitions  
08SERVE.H1, 399.9551931 MHz  
DATA PROCESSING  
FI size 85536  
Total time 7 min, 5 sec

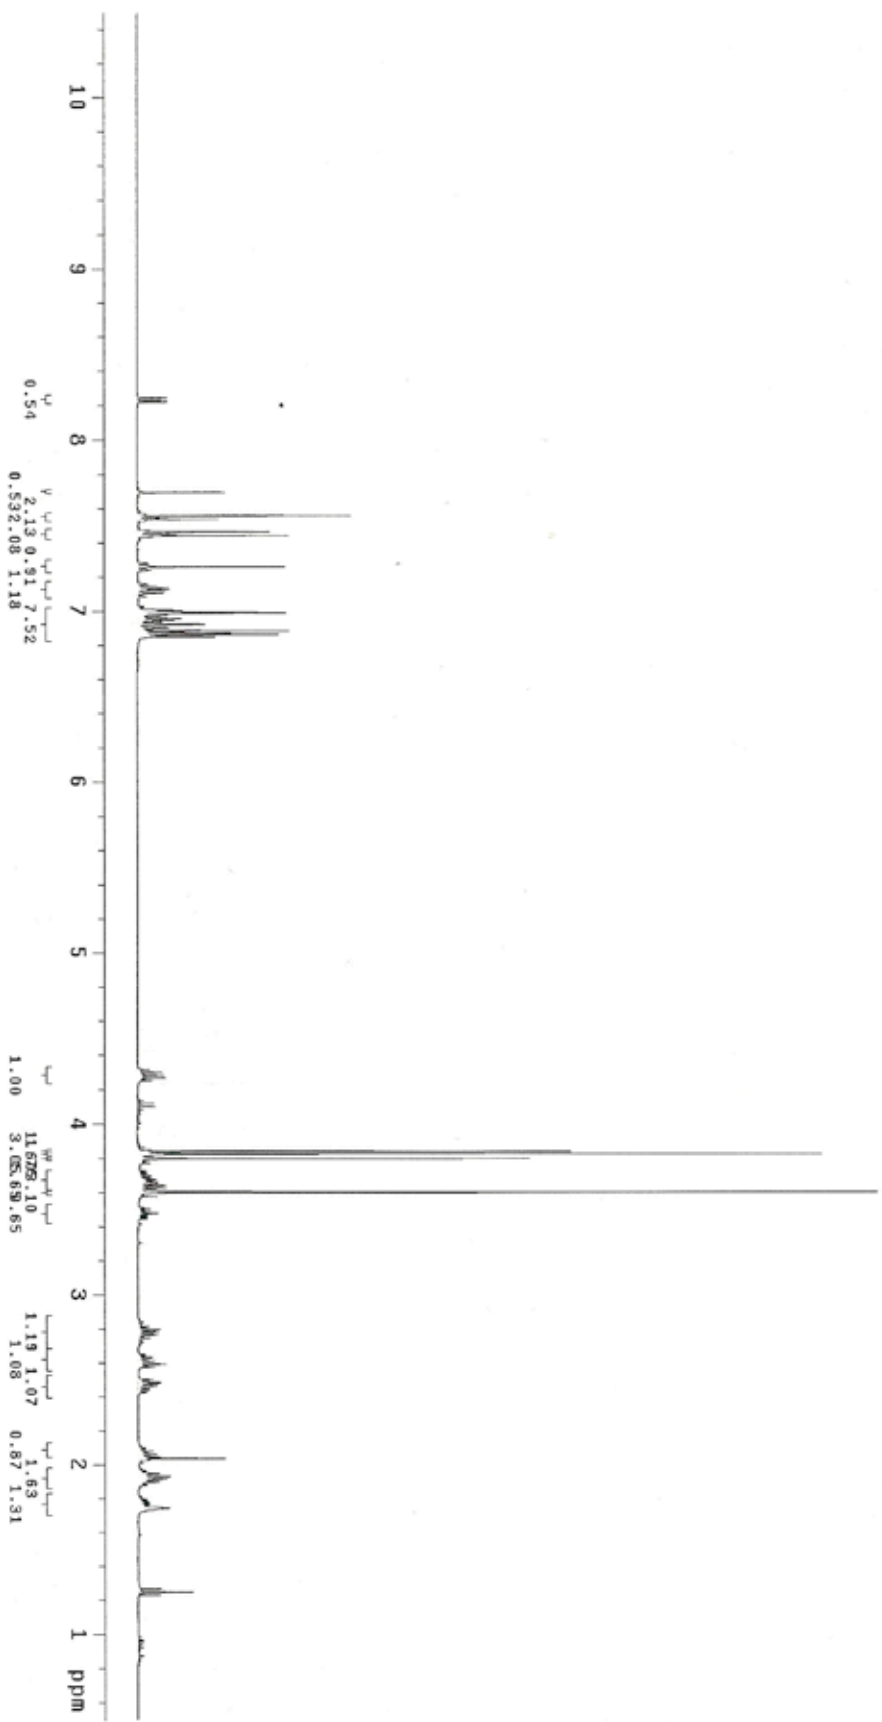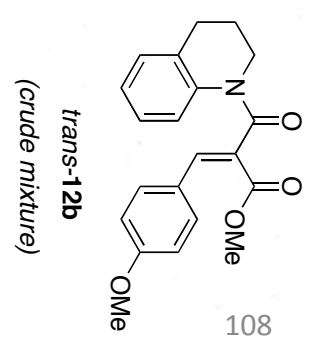

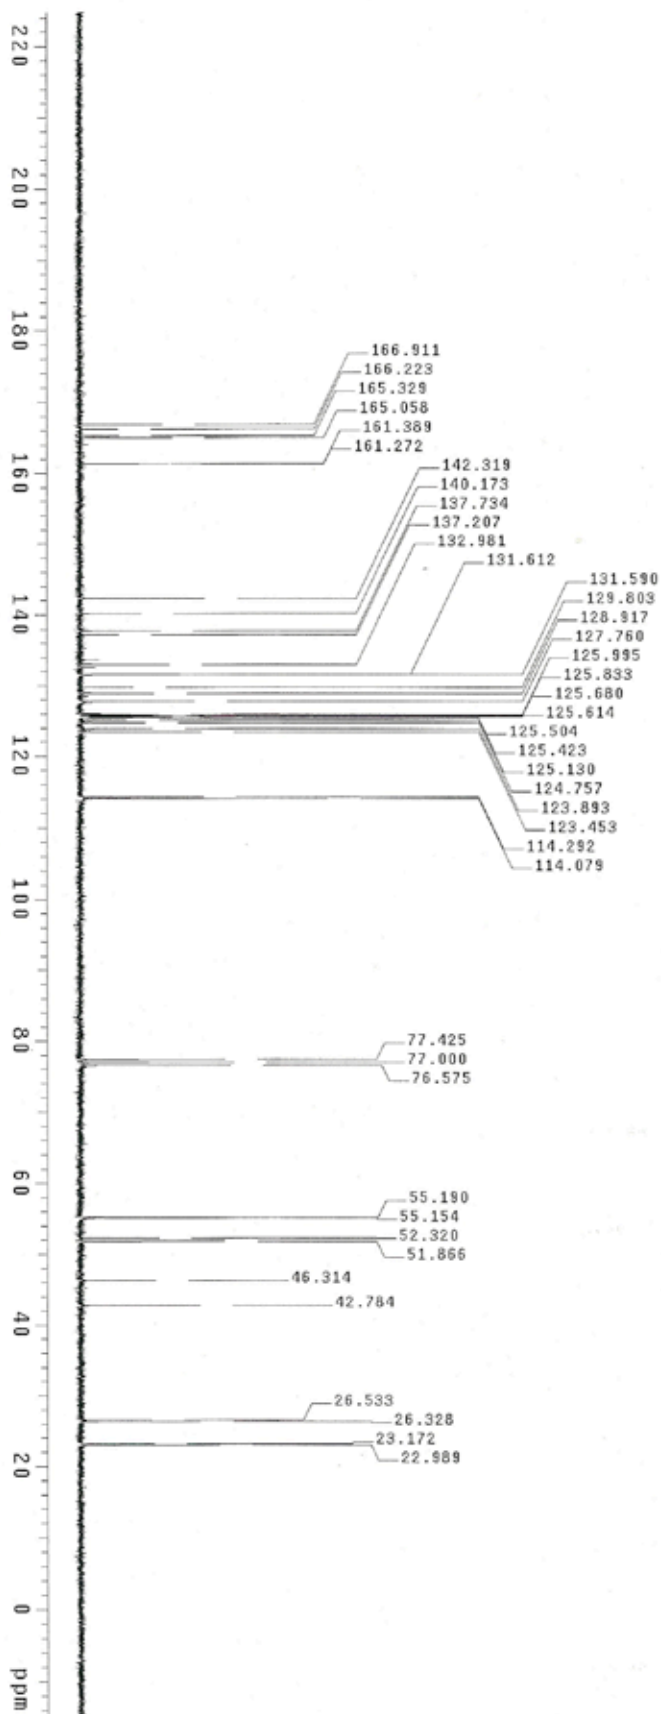

Std Carbon experiment  
Sample: N8-5-DVP-122-B-H  
File: xp  
Pulse Sequence: zgpg30  
Solvent: cdcl3  
Acquisition temperature  
Operator: Dpat1  
Mercury-300 "F202"  
Relax. delay 1.000 sec  
Pulse 30.0 degrees  
Acq. time 1.301 sec  
Width 18115.9 Hz  
128 repetitions  
OBSERVE C13, 75.4900170 MHz  
DECUPLE H1, 300.219481 MHz  
Power 40 dB  
continuously on  
WALTZ-16 modulated  
DATA PROCESSING  
Line broadening 0.5 Hz  
F1 size 65536  
Total time 10 min, 45 sec

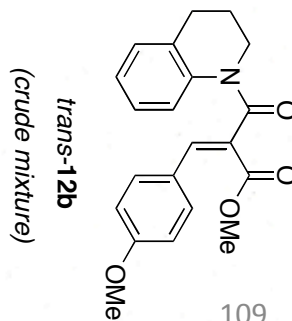

Std Proton parameters  
File: home/france/dpatt1/NO-5-OVP-142-A-HH.fid  
Pulse Sequence: s2pul1  
Solvent: cdcl3  
Ambient temperature  
Operator: dpatt1  
File: NO-5-OVP-142-A-HH  
Mercury-300 v1202  
Relax. delay 1.000 sec  
Pulse 30.0 degrees  
Acq. time 3.550 sec  
Width 4803.1 Hz  
16 repetitions  
OBSERVE H1, 300.2184988 MHz  
DATA PROCESSING  
FT size 65536  
Total time 1 min, 16 sec

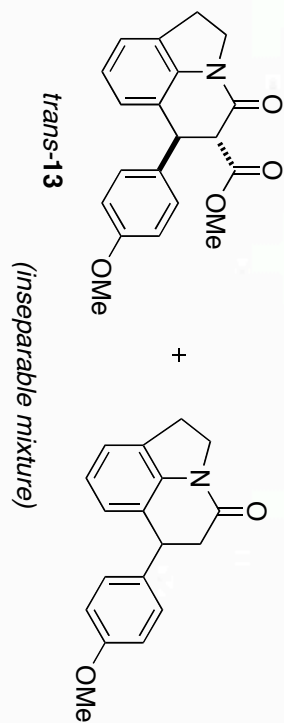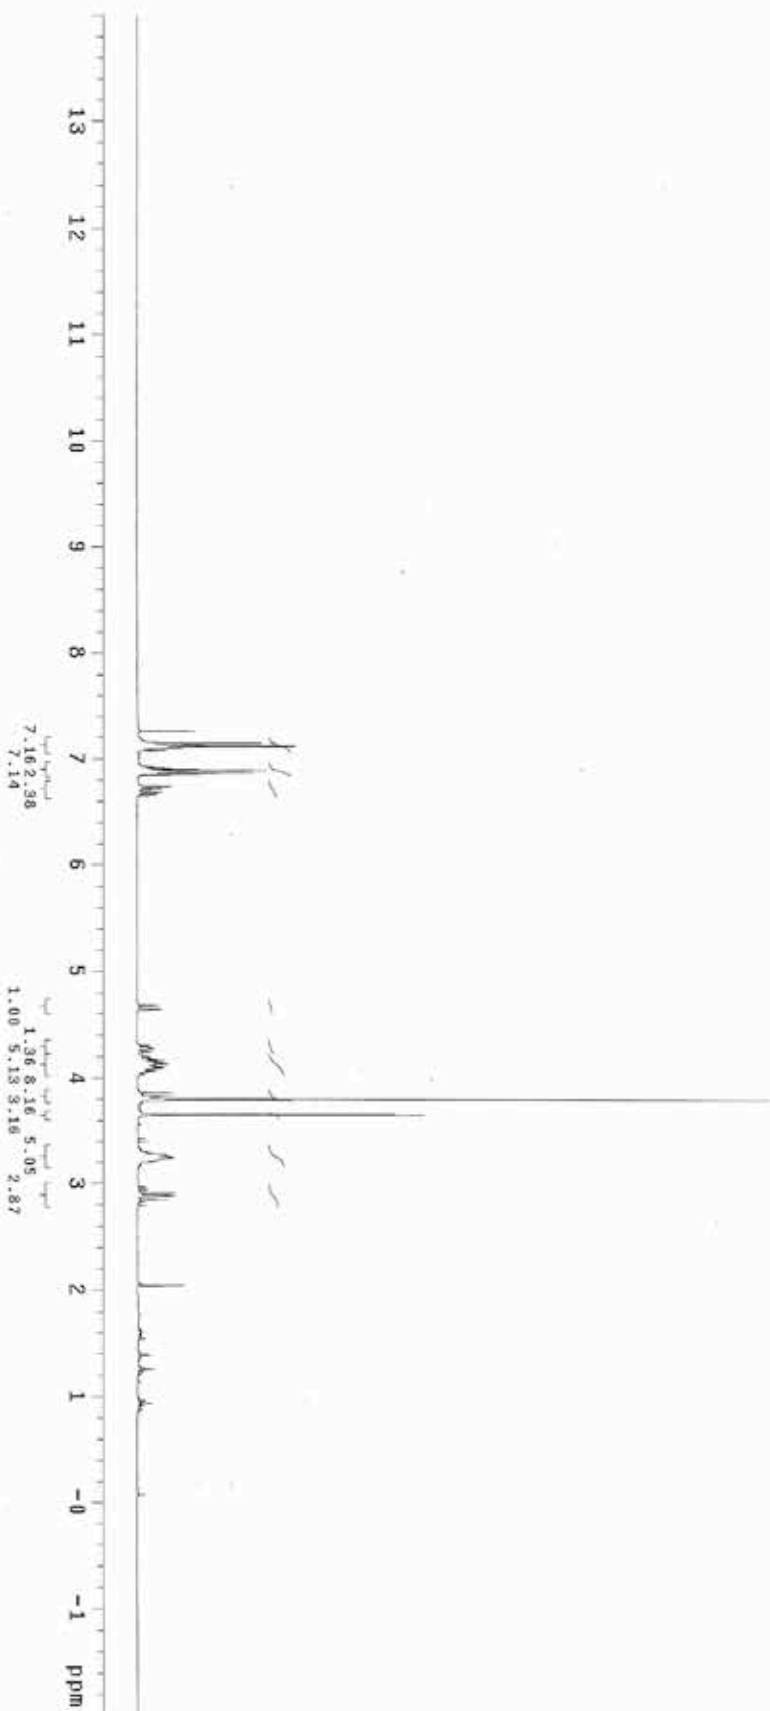

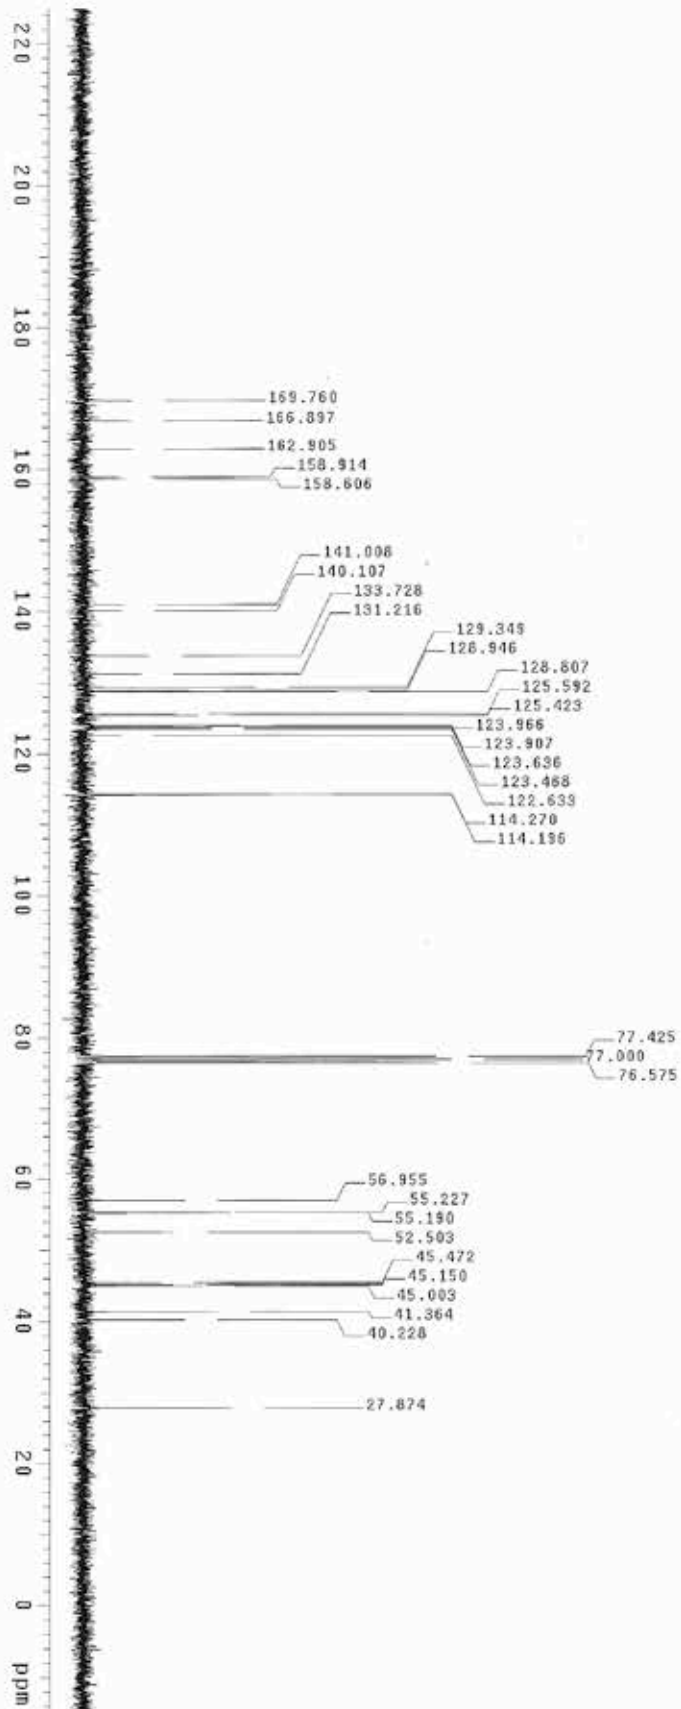

Std Carbon experiment  
Sample: NB-5-DVP-142-A-C  
File: xp  
Pulse Sequence: s2pu1  
Solvent: cdcl3  
Acq. time: 1.501 sec  
Width: 18115.9 Hz  
150 repetitions  
OBSERVE: C13, 75.480059 MHz  
DECUPLE: H1, 300.219481 MHz  
Power: 40 dB  
continuously on  
WALTZ-16 modulated  
DATA PROCESSING  
Line broadening: 0.5 Hz  
F1 size: 65536  
Total time: 10 min, 45 sec

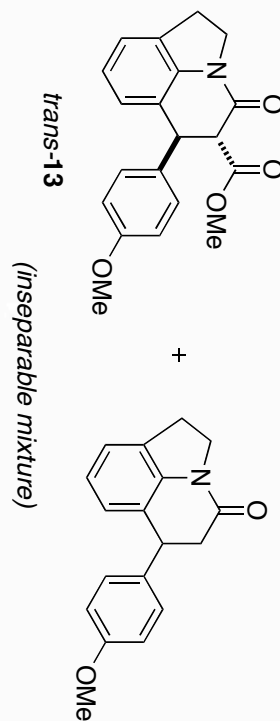

NB-5-DVP-142-B-T2

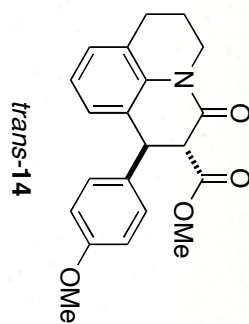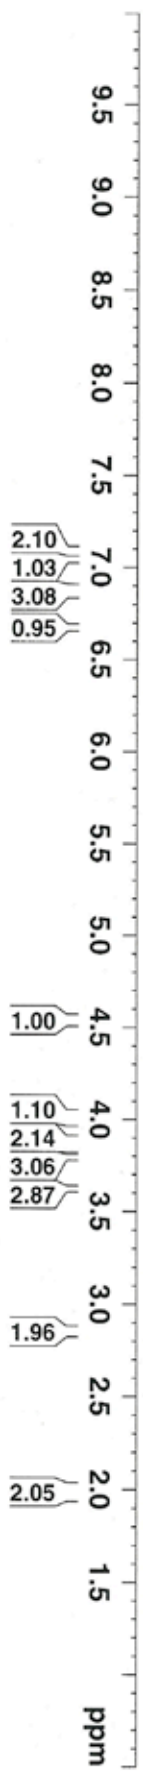



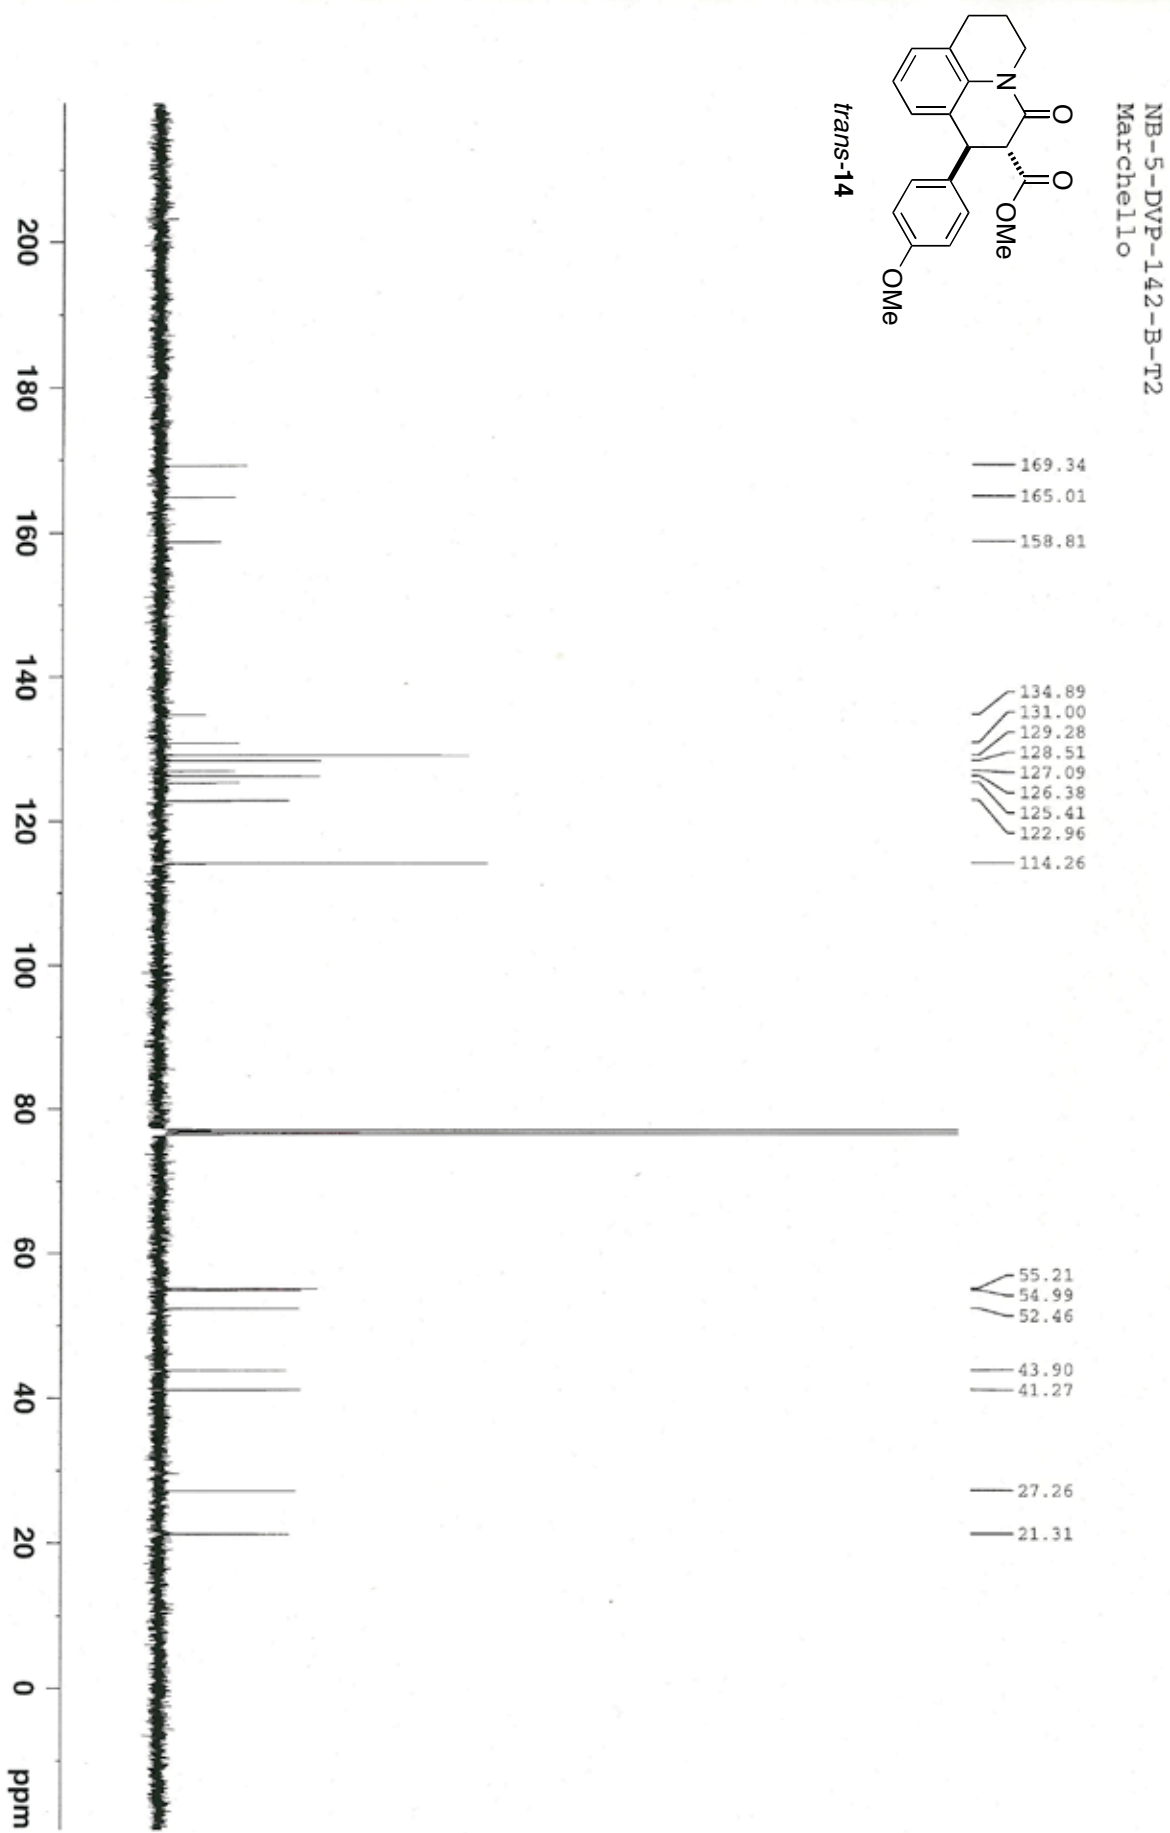

Supplement: c2cc34650h.pdf [file c2cc34650h.pdf]
